# 1 **Labeling proteins within *Drosophila* embryos by** 2 **combining FRET reporters, position-specific genomic** 3 **integration, and GAL4-reponsive expression** <141>

4 Tzyy-Chyn Deng<sup>¶</sup>,<sup>1</sup> Chia-Jung Hsieh<sup>¶</sup>,<sup>1</sup> Michael De Freitas,<sup>1</sup> Maria Boulina,<sup>1</sup> Nima  
5 Sharifai,<sup>1</sup> Hasitha Samarajeewa,<sup>1</sup> Tatsumi Yanaba,<sup>1</sup> James D. Baker,<sup>1</sup> Michael D. Kim,<sup>1</sup>  
6 Susan Zusman,<sup>2</sup> Kenneth H. Wan,<sup>3</sup> Charles Yu,<sup>3</sup> Susan E. Celniker<sup>3</sup> and Akira Chiba<sup>1</sup>

7 <sup>1</sup>Department of Biology, University of Miami, Coral Gables, Florida 33146, USA, <sup>2</sup>Genetic Services Inc., Sudbury, MA 01776, USA,  
8 <sup>3</sup>Department of Genome Dynamics, Lawrence Berkeley National Laboratory, Berkeley, CA 94720, USA

9 ¶ Contributed equally to this project.

10 **Protein interaction network (PIN) or interactome has been mapped vigorously for**  
11 **the entire genome. We recognize, nonetheless, that such a map could illuminate**  
12 **profound insights had its context been revealed. We describe a scalable protein**  
13 **labeling method that could re-supply natural context back to the map of protein**  
14 **interactome. Genetically encoded fluorescent proteins, position-specific genomic**  
15 **integration and GAL4-responsive expression control enable labeling proteins A,**  
16 **B and C each with a either an eGFP, mCherry or NirFP in specified cells of**  
17 **optically transparent animals such as *Drosophila* embryos. While following**  
18 **multiple proteins through development and behavior, these labels offer separable**  
19 **pairs of Förster resonance energy transfer between proteins A and B and**  
20 **proteins B and C. We test and observe FRET interactions between specific**  
21 **protein pairs controlling cytoskeleton, nuclear signaling and cell polarity. By**  
22 **using our protein labeling method, it will be possible to map protein interaction**  
23 **network *in situ* — isPIN.** <150>

24 (with 4 Tables and 6 Figures)

25 **Key words:** eGFP, mCherry, NirFP, FRET

26 **Contributions:** CH, TD, SC and AC conceived the project. CY, KW and SC designed and made the eGFP and mCherry expression  
27 vectors and expression clones. TD, MB and NS made NirFP expression clones. SZ and TD made transgene lines. TD and CH  
28 established stocks. CH, MD, TD, NS and HS performed microscopy, and TY, JD and MK assisted. AC with inputs from other co-  
29 authors wrote the paper.

30 **Acknowledgements:** We thank TK Harris and Rajeev Probhakar for structural biology of GFP, Konstantin Lukyanov for chemistry  
31 of NirFP, Edward Giniger, Francisco Raymo, and Peter Larsson for discussions on FRET-based protein imaging, Grace Zhai for  
32 discussion on *Drosophila*, Laura Bianchi and Kevin Collins for discussion on *C. elegans*, Julia Dallman and Sandra Rieger for  
33 discussion on zebra fish, and Vance Lemmon, Patelis Tsoulfas and Tom Lisse for discussion on mice.

34 Supported in part by research awards RC2-NS069488 from American Recovery and Reinvestment Act and National Institutes of  
35 Health and MH079432 from National Institutes of Health to AC, and research award P41HG3487 from National Human Genome  
36 Research Institute to SC, and performed under U.S. Department of Energy Contracts DE-AC0376SF00098 and DE-AC02-  
37 05CH11231.

38

## 1 INTRODUCTION

2 Protein interaction network (PIN) or interactome has been mapped vigorously for the entire  
3 genome of *Drosophila* (Giot et al., 2003; Guruharsha et al., 2011) and human (Hein et al., 2015;  
4 Rolland et al., 2014). We recognize, nonetheless, that such a map could illuminate profound  
5 insights had its context been revealed. Since 1994, GFP (green fluorescent protein) (Chalfie et  
6 al., 1994) and other genetically encoded fluorescent proteins (Tsien, 1998) have labeled  
7 numerous proteins. They are useful in exposing inherent distribution biases of proteins within  
8 cells of diverse animals (Lukyanov, 2011), as well as serving as an immunological tag for  
9 purification of additional proteins capable of co-complexing (Guruharsha et al., 2011; Hein et al.,  
10 2015). In addition to these applications, valuable information regarding the way proteins interact  
11 *in vivo* can be collected using labeled proteins. Proximity attained by a pair of proteins that are  
12 labeled with spectrally overlapping fluorophores induces Förster resonance energy transfer  
13 (FRET), *i.e.*, transfer of energy at near field from a fluorescence donor to a fluorescence  
14 acceptor (Förster, 1948). Therefore, occurrence of FRET as described best through quantum  
15 physics (Lakowicz, 2006) serves as a visual proxy for when and where proteins of interest  
16 interact with one another (Clegg, 2010). The idea of proximity-based scrutiny of interacting  
17 proteins (Sharifai et al., 2014) is not new, as the use of two-domain protein GAL4 transcription  
18 factor of yeast (Fields and Song, 1989) has expanded successfully to non-yeast proteins (Giot  
19 et al., 2003; Rolland et al., 2014). In contrast to yeast two-hybrid assays that sensitively  
20 demonstrate proteins' binding compatibility, we maintain the native environment of the proteins  
21 we assess although, similarly to these assays, for a pair at a time. Our optimization aims for  
22 both the quality design in labeling proteins and the tight control in expressing labeled proteins.  
23 By using our protein labeling method (see **Table1**), it will be possible to re-supply natural  
24 context back to the map of protein interactome.

## 25 RESULTS

26 To label individual proteins, we chose genetically encoded fluorescent proteins eGFP  
27 (Bierhuizen et al., 1997), mCherry (Shaner et al., 2004) and NirFP (Shcherbo et al., 2010)  
28 (**FIG1**). These labels serve as versatile imaging tools to study proteins within live animals. First,  
29 each of these fluorophores has structural resemblance to a “cage”. This cage-like configuration  
30 is likely the strongest natural means for protecting a set of fluorescing atoms from surrounding  
31 stress. More specifically, the extremely rare  $\beta$  sheet barrels constituting these proteins are  
32 proposed to solidly safeguard a small  $\alpha$  helix, T65-Y66-G67 in eGFP for instance, capable of  
33 exhibiting fluorescent properties (Ormo et al., 1996). Another well-known example of  $\beta$  sheet  
34 barrels protecting delicate internal structures occurs among channel proteins, such as in a  
35 tetrameric potassium channel (Zhou et al., 2001), that regulate ion selectivity of the cell surface.  
36 Second, each of these fluorescent labels is physically linked to a protein of interest through a  
37 “loop.” Unlike synthetic chemicals that need conjugation through much weaker non-covalent  
38 bonds, this robustly covalent yet non-structural linkage achieves two consequences: (1) a short  
39 and constant distance between the label and the protein that is labeled, and (2) randomization  
40 of dipole orientation known as  $\kappa^2$  of the label with respect to the protein it labels. Unlike synthetic  
41 fluorescent dyes (Pertz et al., 2006) or fluorescence-absorbing metal atoms (Koch and Larsson,  
42 2005), neither eGFP, mCherry, nor NirFP requires pre-imaging dissection or incubation of  
43 animals after attaining full maturation, typically within 2-4 hours. As mentioned elsewhere  
44 (Chong et al., 2015; Hudson et al., 2008; Sarov et al., 2012; Trinh le et al., 2011; Venken et al.,  
45 2011), these and other genetically encoded fluorescent proteins are extremely valuable for time  
46 lapse imaging of proteins during development and behavior of animals. eGFP, mCherry and  
47 NirFP are derived from jellyfish *Aequoria* and sea anemone, *Discosoma* and *Entacmaea*,

1 respectively. Unlike their natural forms, however, custom-tuned eGFP and mCherry are each  
2 monomeric and do not dimerize by themselves. Also important, these two and NirFP do not bind  
3 one another directly when co-expressed in model organisms such as *Drosophila* (our  
4 observation). This is satisfactory because during imaging, both eGFP and mCherry are required  
5 to serve as a FRET donor. Any inherent affinity, whether previously known or unknown,  
6 between labeled proteins needs to be the sole reason for inducing FRET. Absorption and  
7 emission spectra of these fluorescent labels are distinct from each other. Notably, the eGFP-  
8 mCherry-NirFP trio offers two excellent yet separable FRET pairs: eGFP-to-mCherry with a  
9 Förster distance of 5.2 nm and mCherry-to-NirFP with a Förster distance of 4.4 nm. Multiplexing  
10 FRET capabilities using this trio may therefore serve as the basis for exposing the logic  
11 governing and/or the extent delimiting proteins interacting with each other (not shown). Although  
12 we are not aware of any systematic test on the functional neutrality of protein labeling, we  
13 believe that genetic knockouts of any specific proteins, if attempted, may be rescued by using  
14 fluorescently labeled but otherwise wild type forms of proteins. In fact, the very first use of GFP  
15 in fruit flies reported that genetic knockout of a certain nuclear protein could be rescued by  
16 expressing a GFP-fused wild-type form (Wang and Hazelrigg, 1994). More recently, Cdc42  
17 protein, required for initiating the dendrites in neurons (Kamiyama and Chiba, 2009), was shown  
18 to rescue animals lacking a *cdc42* gene, regardless of whether the wild type transgene was  
19 fused to eGFP or not (our observation). We did not adopt split GFP as in the GRASP method  
20 (Feinberg et al., 2008) or sequential two-step GFP formation as in the GFP11 knock-in method  
21 (Kamiyama et al., 2016) because these strategies do not distinguish transient from permanent  
22 interactions. It should be further noted that these fluorescent proteins cannot readily fuse to  
23 DNA or RNA covalently, thus limiting their potential usage for exposing binding specificity of  
24 certain transcription factors or other DNA-binding/RNA-binding proteins toward particular  
25 nucleotide sequences through FRET.

26 We developed expression vectors, pUAS-C-eGFP-BD-attB, pUAS-C-mCherry-BD-attB, pUAS-  
27 N-eGFP-BD-attB and pUAS-N-mCherry-BD-attB for generating fluorescently tagged proteins of  
28 interest (POIs) (**FIG2**). First, we transferred protein open reading frames (ORFs) to the  
29 expression vectors using the Cre-Lox recombination cloning system, similar to the strategy used  
30 to make FLAG-HA constructs for tandem-affinity purification conducted previously (Guruharsha  
31 et al., 2011). The use of 100% sequence-validated XO and XS clone sets (Yu et al., 2011)  
32 prevents any unknown or non-intentional modification of the proteins being analysed. For 286  
33 selected genes we used 283 BO clones to produce carboxyl terminal fusions from the XO clone  
34 set and 264 BS clones to produce amino terminal fusions from the XS clone set. We generated  
35 953 expression clones in total: 236 UGS (eGFP amino tag), 245 URS (mCherry amino tag), 228  
36 UGO (eGFP carboxyl tag) and 244 URO (mCherry carboxyl tag). Second, the *attP* sequence  
37 added to each expression vector is required for targeted integration of transgenes into specific  
38 landing sites in the *Drosophila* genome. We used phiC31 integrase, as originally characterized  
39 in retroviruses (Groth et al., 2004). The landing sites selected, *attP40* and *vk01* on chromosome  
40 2 and *attP2* on chromosome 3, have high integration rates and are also known to induce  
41 sufficiently high rates of expression as GAL4-responsive transgenes (Markstein et al., 2008;  
42 Venken et al., 2006a). It is also straightforward to introduce two transgenes onto one  
43 chromosome as a double transgene stock though intentional homologous recombination. Third,  
44 a tandem *UAS* sequence added to the vectors allows for expressing transgenes under the  
45 control of yeast GAL4 transcription factor (Brand and Perrimon, 1993). This enhancer hijacking  
46 in a foreign host genome, *i.e.*, *Drosophila* in our case, offers total control over the time and  
47 place for co-expressing up to three transgenes all at a constant dosage.

48 Using this position-specific integration in the *Drosophila* genome, various single transgene,  
49 double transgene, and triple transgene stocks can be created (**FIG3a-c**). Homologous

1 recombination occurs in the female germ line and, therefore, the use of balancer chromosomes  
2 during standard genetic crosses suppresses unwanted recombination of two transgenes in a  
3 single chromosome, *e.g.*, chromosome *ii*. As illustrated schematically, intentional uses of  
4 balancers afford stress-free combination of multiple transgenes, with all undergoing expression  
5 at constant dosage. Incidentally, a single genetic dosage is sufficient for detecting fluorescence  
6 from all labeled proteins, as well as detecting FRET quantitatively. The low-dosage expression  
7 also minimizes photo-toxicity during repeated and/or time-lapse imaging. The genotype of  
8 typical experimental animals has three GAL4-responsive transgenes for co-expressing proteins  
9 *A*, *B* and *C* labeled with eGFP, mCherry and NirFP, respectively, allowing for visualization of co-  
10 localizing POIs (**FIG3d**). Similarly, when a protein couple is present, the two may exhibit specific  
11 affinity with each other and can be directly demonstrated through FRET (**FIG3e**). Nevertheless,  
12 all FRET quantifications are to be compared to “*blank*” controls in which the fluorescently  
13 labeled POI is co-expressed with un-fused (cytoplasmic) fluorescent labels.

14 A label may be added to either the amino or carboxyl terminus of any POI, offering independent  
15 ways to visualize the same protein in the same microenvironment (**FIG4a**). The same protein  
16 may be labeled by any of the three colors (**FIG4b**). In our experience, choice in the label  
17 position or label color has not altered the intensity or distribution pattern of fluorescence,  
18 supporting their interchangeability as labels. The GAL4 driver may be ubiquitously expressed  
19 (*e.g.*, *tub-GAL4* drives expression in all cells throughout development), specific to a whole tissue  
20 (*e.g.*, *elav-GAL4* drives expression in all neuronal but not glia cells) or to a single cell (*e.g.*, *eve*-  
21 *GAL4* drives expression in aCC motoneurons in addition to frequent pCC interneurons and RP2  
22 motoneurons in all 14 segments of the ventral nerve cord) (**FIG4c**). In neuroscience, the  
23 question of presynaptic versus postsynaptic components of synapses is important as discussed  
24 on long-term potentiation, for example (Sanes and Lichtman, 1999). Being able to limit  
25 expression to either the presynaptic neurons, postsynaptic neurons or target cells would be  
26 valuable. In a general sense, biology of multi-compartmental cells can be scrutinized in ways  
27 not easily possible with endogenous or other non-GAL4 controls. The three fluorescent colors  
28 may label three different proteins *A*, *B* and *C* in the same cell or cell type defined by a particular  
29 GAL4 driver (**FIG5**). There, proteins may be observed in patterns that are unique to each tissue  
30 and/or a single cell within a given animal. Co-expression is necessary but not predictive of their  
31 interaction, nevertheless. In fact, patterns of expression for each protein as well as those of co-  
32 expression may not correlate at all to when and where FRET occurs (**FIG6**). Therefore, the true  
33 protein interactomic map awaits future characterization through direct imaging of fluorescently  
34 labeled proteins within animals, *i.e.*, the natural context.

## 35 DISCUSSION

36 The labeling method described in this paper employs the exogenous GAL4 system. Potential  
37 drawbacks of this, or any other methods not using the endogenous expression control, are two-  
38 fold. First, the timing and dosage of expression can be inappropriate for assessing the function  
39 of the protein of interest. The endogenous expression patterns are often available through  
40 mRNA *in situ* hybridization and/or antibody staining of their gene products. In theory, one can  
41 focus only on sites and times that are justifiable. Even so, any difference between the native  
42 endogenous expression and controlled exogenous expression can be a cause of concerns.  
43 Second, the endogenous gene expression remains untouched. Consequently, labeled protein *A*  
44 would potentially interact with both exogenously expressed and endogenously present labeled  
45 protein *B* and un-labeled protein *B*, respectively. When looking for evidence of FRET, there is  
46 always a possibility of under-estimating the true interaction probability between proteins *A* and  
47 *B*. (*Note*: Protein trapping, that in theory circumvent issues arising from endogenous versus

1 exogenous expression controls, has been designed for the *Drosophila* studies using green and  
2 red fluorescent proteins (Quinones-Coello et al., 2007; Venken et al., 2011); but the method  
3 described in this paper integrates notable advantages — see below.)

4 Our method incorporates several useful design concepts (see **Table 1**). In particular, the use of  
5 genetically encoded fluorescent proteins guarantees a one-to-one relationship between the  
6 label and the labeled. Also, their sturdy yet flexible linkers are thought to drastically simplify  
7 FRET computation. In addition, the GAL4 expression system, despite the discussion above,  
8 offers an unparalleled control over the time and place of expression, as well as maintaining it at  
9 a constantly low dosage. Furthermore, with position-specific transgene integration, the variability  
10 of transgene expression levels — a major source of complication in many genetic experiments  
11 — becomes minimal if not a non-issue in practice. As an added advantage, it is relatively  
12 straightforward to combine multiple labeled proteins through a series of genetic crosses. An  
13 additional detail not to be overlooked is that with an ever-expanding list of available GAL4  
14 drivers (Jenett et al., 2012), the access to single cells becomes increasingly feasible. This would  
15 grant a significant advantage to neuroscience where axons, dendrites and synapses of the  
16 same cell can manifest distinct properties. Altogether, co-localization of three proteins *A*, *B* and  
17 *C*, as well as possible interaction between *A* and *B*, independent of the interaction between *B*  
18 and *C*, may all be documented. Finally, principles from most of these genetic engineering tools  
19 may be applicable to other metazoan model organisms such as nematodes, zebra fish and  
20 small mammals. Whether or not the concepts used in design of labeling or expression control  
21 may vary in detail, proteins that are labeled fluorescently in diverse animal systems will open a  
22 way to map freely interacting proteins within their natural context.

## 23 METHODS

24 *Acceptor Vector construction.* To generate the C-terminus tagged vectors, the pUAST  
25 expression vector (Brand and Perrimon, 1993) was cut with NotI and XbaI. The pUAST-C-TAP-  
26 BD expression vector (Stapleton) was cut with NotI and XbaI to release a 256 bp fragment  
27 containing loxP, chloramphenicol promoter and splice acceptor sequences. This 256 bp C-  
28 terminus BD cassette was inserted into the linearized pUAST vector by overnight ligation. The  
29 resulting C-terminus BD-adapted pUAST vector was linearized again by cutting it with XbaI. To  
30 generate the N-terminus tagged vectors, the pUAST expression vector was cut with EcoRI and  
31 XhoI. The pUAST-N-TAP-BD expression vector was cut with EcoRI and XhoI to release a 167  
32 bp fragment containing loxP and chloramphenicol promoter sequences. This 167 bp C-terminus  
33 BD cassette was inserted into the linearized pUAST vector by overnight ligation. The resulting  
34 N-terminus BD-adapted pUAST vector was linearized again by cutting it with EcoRI. The CDS of  
35 the EGFP and mCherry fluorescent tags were obtained by PCR from the pEGFP-C1 (Clontech)  
36 and pRSET-B-mCherry (Invitrogen) vectors, respectively. C-terminus fluorescent tags were  
37 amplified using XbaI-tailed PCR primers, while N-terminus tags were amplified using EcoRI-  
38 tailed PCR primers (see below). The resulting PCR products were agarose gel-purified and cut  
39 with either XbaI (C-terminus tag) or EcoRI (N-terminus tag). Following ethanol precipitation, the  
40 XbaI digested C-terminus fluorescent tags were inserted into the XbaI linearized BD-adapted  
41 pUAST vector by overnight ligation. The EcoRI digested N-terminus tags were inserted into the  
42 EcoRI linearized BD-adapted pUAST vector by overnight ligation. The resulting C- or N-  
43 terminus fluorescent-tagged and BD-adapted pUAST vectors are cut with BamHI to release the  
44 portion of the vector containing the 5x UAS promoter, hsp70, BD cassette, fluorescent tag and  
45 SV40 terminator sequences. Agarose gel-purify the BamHI digested fragments. We linearized  
46 the pBDP vector by cutting it with BamHI and ethanol precipitated the digested product. We  
47 inserted the purified C- or N-terminus fluorescent-tagged and BD-adapted BamHI fragments

1 from the pUAST vectors into the linearized pBDP vector by overnight ligation. The resulting  
2 vectors are pUAS-C-EGFP-BD-attB, pUAS-C-mCherry-BD-attB, pUAS-N-EGFP-BD-attB and  
3 pUAS-N-mCherry-BD-attB. (Note: Expression vectors were designed similarly for labeling POI  
4 with NirFP but are yet unavailable at the DGRC.)

5 *Sequences: 256bp C-terminus BD cassette: 5'-*  
6 *GGCCGCATAACTTCGTATAGCATACATTATACGAAGTTATAGATCCAATATTATTGAAGCAT*  
7 *TTATCAGGGTTATTGTCTCATGAGCGGATACATATTTGAATGTATTTAGAAAAATAAACAAAT*  
8 *AGGGGTTCCGCGCACATTTCCCCGAAAAGTGCCACCTGACGTGGATCTCGAGCTCAAGCT*  
9 *TCGAATTCAGGGTTTCCTTGACAATATCATACTTATCCTGTCCCTTTTTTTTCCACAGCTACC*  
10 *GGTCGCGT-3' 167bp N-terminus BD cassette: 5'-*  
11 *AATTCATAACTTCGTATAGCATACATTATACGAAGTTATAGATCCAATATTATTGAAGCATTT*  
12 *ATCAGGGTTATTGTCTCATGAGCGGATACATATTTGAATGTATTTAGAAAAATAAACAAATA*  
13 *GGGGTTCCGCGCACATTTCCCCGAAAAGTGCCACCTGACGTC-3' XbaI-tailed PCR primers:*  
14 *C-mCherry-FWD 5'-cccctctagaGTGAGCAAGGGCGAGGAGGATAACATG-3' C-mCherry-REV*  
15 *5'-ggggctctagaTTACTTGTACAGCTCGTCCATGCCGC-3' C-EGFP-FWD 5'-*  
16 *cccctctagaGTGAGCAAGGGCGAGGAGCTGTTC-3' C-EGFP-REV 5'-*  
17 *ggggctctagaTTACTTGTACAGCTCGTCCATGCCGAG-3' EcoRI-tailed PCR primers: mCherry-N-*  
18 *FWD 5'-ccccgaattcacaccATGGTGAGCAAGGGCGAGGAGGAT-3' mCherry-N-REV 5'-*  
19 *ggggaattcccCTTGTACAGCTCGTCCATGCCGCC-3' EGFP-N-FWD 5'-*  
20 *ccccgaattcacaccATGGTGAGCAAGGGCGAGGAGCTG-3' EGFP-N-REV 5'-*  
21 *ggggaattcccCTTGTACAGCTCGTCCATGCCGAG-3'*

22 *Expression Clone sets:* We transferred ORFs from the BDGP *Drosophila melanogaster* XO and  
23 XS expression-ready clone sets to the pUAS-C-EGFP-BD-attB, pUAS-C-mCherry-BD-attB,  
24 pUAS-N-EGFP-BD-attB and pUAS-N-mCherry-BD-attB acceptor vectors (Yu et al., 2011). For  
25 recombination reactions, 200 ng of expression-ready Donor clone and acceptor Vector were  
26 recombined in a final volume of 10  $\mu$ l for 15 minutes at 25 °C in a thermal cycler in the presence  
27 of Cre recombinase (0.2 units) and recombinase buffer supplemented with BSA (0.1 mg/ml)  
28 (Clontech #631614) according to Clontech manual PT3460-1 (now part of Takara Bio). Cre  
29 recombinase was inactivated by incubating the reaction at 70 °C for 10 minutes. From this  
30 reaction, 5  $\mu$ l was transformed into chemically competent TAM-1 cells in a 96-well plate format  
31 (Active Motif #11096) and selected for Chloramphenicol resistance. Each clone was sequence  
32 verified to check for target mismatches using BigDye Terminator v3.1 ready reaction mix  
33 (Applied Biosystems #4337457) and the sequencing primer: 5'-  
34 *GCCAATGTGCATCAGTTGTGGTC-3'*. Sequencing samples were analyzed on a conventional  
35 capillary electrophoresis instrument (e.g., ABI 3730/3730xl DNA Analyzer). Glycerol stocks were  
36 generated and stored for each isolate. Clones can be obtained from the *Drosophila* Genome  
37 Resource Center (DGRC) in Bloomington, IN and sequence from GenBank using the accession  
38 numbers provided in Supplemental Table.

39 *Drosophila stocks.* *tub-GAL4* - source: Bloomington Stock #60298 was used for ubiquitous  
40 expression. *elav-GAL4* - source: Bloomington Stock # 8760 was used for pan-neuronal  
41 expression. *eve-GAL4*<sup>[RN2-GAL4-E]</sup> - source: M. Fujjoka was used for expression in aCC/RP2/pCC  
42 neurons. Transgenic flies carrying *UAS-eGFP::POI* (*attp40* site at 25C7 - source:  
43 [www.geneticservices.com](http://www.geneticservices.com)), *UAS-mCherry::POI* (*vk01* site at 59D3 - source: Bloomington Stock  
44 # 9722) on the second chromosome and *UAS-NirFP::POI* (*attp2* site at 68A4 - source:  
45 Bloomington Stock # 8622) on the third chromosome were constructed as described (Sharifai et  
46 al., 2014). All *attp* landing sites were selected because of their integration rates varying as high  
47 as 25-35%, i.e., more efficiently than *P* element transformation of about 1%. *P Bac(y+.attp-3b)*  
48 *attp2* and *P Bac(y+.attp-3b) att40* are from the collections described in (Groth et al., 2004) and

15 August 2019

1 (Szabad et al., 2012). They are located at map positions 25C6 (*attp40*) on the second  
2 chromosome and 68A4 (*attp2*) on the third chromosome. *PBac(y+.attp-3b) vk01* is from the  
3 Venken Bac collection (Venken et al., 2006b) and is located at 59D3 of the second  
4 chromosome. Besides their high integration rates, these integration sites were used also for  
5 high expression rates and low background effects (Markstein et al., 2008; Pfeiffer et al., 2010)  
6 (Zusman et al. unpublished observations). For all integration sites the integrase-producing  
7 transgene *P(nos-phiC31\int.NLS) X* (Bischof et al., 2007) was used.

8 *Imaging.* UAS-transgene carrying males were crossed with GAL4 driver carrying virgin females  
9 in mating cages using grape juice agar plates coated with yeast to collect embryos. Mating  
10 cages were placed at 25 °C and collection plates were swapped after one hour to gather  
11 embryos for a given developmental stage. Embryos were manually dechorionated and  
12 developmental staging was confirmed by gut morphology. Embryos were placed on double-  
13 sided tape attached to a glass slide with a silicone well and then immersed in HL3.1 hemolymph  
14 buffer for imaging. We used an upright microscope with a x40 or x63 water-immersion objective  
15 lens to image the sample. However, when an inverted microscope was used, a coverslip was  
16 placed over the buffer-immersed embryos using elastic silicone. Subsequently, the slide was  
17 flipped upside-down and mounted on a x40 or x63 oil-immersion objective lens. In some cases,  
18 devitellinization, filet dissection, or both, were performed to increase signal intensities of eGFP,  
19 mCherry and NirFP. A ratio of mCherry over eGFP being between 0.1 and 10 was found  
20 essential for obtaining reliable FRET measurements, consistent with previous findings (Berney  
21 and Danuser, 2003). No samples created through our transgenic method produced a sign of  
22 “false positive” FRET, *i.e.*, a false decrease in donor fluorescence lifetime. In contrast,  
23 experiments using standard retrovirus transfection methods in human and insect cell lines had  
24 an expression level of mCherry, the FRET acceptor, beyond the ratio of 100 and produced such  
25 a “false positive” FRET (not shown).

26 *FRET probability.* The probability of FRET is defined as a product of the concentration and  
27 lifetime reduction of a FRET donor, *e.g.*, eGFP or mCherry. Whereas the concentration of a  
28 given protein varies from pixel to pixel, the fluorescence lifetime  $\tau$  is calculated independently of  
29 its concentration. Consequently, a polar histogram allows for normalization of the FRET  
30 probability irrespective of the size of proteins interacting with each other. This size-free unit of  
31 protein interactome is termed “interaction” (Sharifai et al., 2014).

32

## 1 REFERENCES

- 2 Berney, C., and Danuser, G. (2003). FRET or no FRET: a quantitative comparison. *Biophys J*  
3 *84*, 3992-4010.
- 4 Bierhuizen, M.F., Westerman, Y., Visser, T.P., Wognum, A.W., and Wagemaker, G. (1997).  
5 Green fluorescent protein variants as markers of retroviral-mediated gene transfer in primary  
6 hematopoietic cells and cell lines. *Biochem Biophys Res Commun* *234*, 371-375.
- 7 Bischof, J., Maeda, R.K., Hediger, M., Karch, F., and Basler, K. (2007). An optimized  
8 transgenesis system for *Drosophila* using germ-line-specific phiC31 integrases. *Proc Natl Acad*  
9 *Sci U S A* *104*, 3312-3317.
- 10 Brand, A.H., and Perrimon, N. (1993). Targeted gene expression as a means of altering cell  
11 fates and generating dominant phenotypes. *Development* *118*, 401-415.
- 12 Chalfie, M., Tu, Y., Euskirchen, G., Ward, W.W., and Prasher, D.C. (1994). Green fluorescent  
13 protein as a marker for gene expression. *Science* *263*, 802-805.
- 14 Chong, Y.T., Koh, J.L., Friesen, H., Duffy, S.K., Cox, M.J., Moses, A., Moffat, J., Boone, C., and  
15 Andrews, B.J. (2015). Yeast proteome dynamics from single cell imaging and automated  
16 analysis. *Cell* *161*, 1413-1424.
- 17 Clegg, R.M. (2010). Fluorescence lifetime-resolved imaging: what, why, how - a prologue. In  
18 FLIM microscopy in biology and medicine, A. Periasamy, and R.M. Clegg, eds., pp. 3-29.
- 19 Feinberg, E.H., Vanhoven, M.K., Bendesky, A., Wang, G., Fetter, R.D., Shen, K., and  
20 Bargmann, C.I. (2008). GFP Reconstitution Across Synaptic Partners (GRASP) defines cell  
21 contacts and synapses in living nervous systems. *Neuron* *57*, 353-363.
- 22 Fields, S., and Song, O. (1989). A novel genetic system to detect protein-protein interactions.  
23 *Nature* *340*, 245-246.
- 24 Förster, T. (1948). Intermolecular energy migration and fluorescence. *Annalen der Physik* *437*,  
25 55-75.
- 26 Giot, L., Bader, J.S., Brouwer, C., Chaudhuri, A., Kuang, B., Li, Y., Hao, Y.L., Ooi, C.E.,  
27 Godwin, B., Vitols, E., *et al.* (2003). A protein interaction map of *Drosophila melanogaster*.  
28 *Science* *302*, 1727-1736.
- 29 Groth, A.C., Fish, M., Nusse, R., and Calos, M.P. (2004). Construction of transgenic *Drosophila*  
30 by using the site-specific integrase from phage phiC31. *Genetics* *166*, 1775-1782.
- 31 Guruharsha, K.G., Rual, J.F., Zhai, B., Mintseris, J., Vaidya, P., Vaidya, N., Beekman, C.,  
32 Wong, C., Rhee, D.Y., Cenaj, O., *et al.* (2011). A protein complex network of *Drosophila*  
33 *melanogaster*. *Cell* *147*, 690-703.
- 34 Hein, M.Y., Hubner, N.C., Poser, I., Cox, J., Nagaraj, N., Toyoda, Y., Gak, I.A., Weisswange, I.,  
35 Mansfeld, J., Buchholz, F., *et al.* (2015). A human interactome in three quantitative dimensions  
36 organized by stoichiometries and abundances. *Cell* *163*, 712-723.
- 37 Hudson, A.M., Petrella, L.N., Tanaka, A.J., and Cooley, L. (2008). Mononuclear muscle cells in  
38 *Drosophila* ovaries revealed by GFP protein traps. *Dev Biol* *314*, 329-340.
- 39 Jenett, A., Rubin, G.M., Ngo, T.T., Shepherd, D., Murphy, C., Dionne, H., Pfeiffer, B.D.,  
40 Cavallaro, A., Hall, D., Jeter, J., *et al.* (2012). A GAL4-driver line resource for *Drosophila*  
41 neurobiology. *Cell reports* *2*, 991-1001.



- 1 Kamiyama, D., and Chiba, A. (2009). Endogenous activation patterns of Cdc42 GTPase within  
2 *Drosophila* embryos. *Science* 324, 1338-1340.
- 3 Kamiyama, D., Sekine, S., Barsi-Rhyne, B., Hu, J., Chen, B., Gilbert, L.A., Ishikawa, H.,  
4 Leonetti, M.D., Marshall, W.F., Weissman, J.S., *et al.* (2016). Versatile protein tagging in cells  
5 with split fluorescent protein. *Nature communications* 7, 11046.
- 6 Koch, H.P., and Larsson, H.P. (2005). Small-scale molecular motions accomplish glutamate  
7 uptake in human glutamate transporters. *J Neurosci* 25, 1730-1736.
- 8 Lakowicz, J.R. (2006). *Protein Fluorescence* (Springer Science & Business Media).
- 9 Lukyanov, K.A. (2011). Green-red flashers to accelerate biology. *Chem Biol* 18, 1202-1204.
- 10 Markstein, M., Pitsouli, C., Villalta, C., Celniker, S.E., and Perrimon, N. (2008). Exploiting  
11 position effects and the gypsy retrovirus insulator to engineer precisely expressed transgenes.  
12 *Nat Genet* 40, 476-483.
- 13 Ormo, M., Cubitt, A.B., Kallio, K., Gross, L.A., Tsien, R.Y., and Remington, S.J. (1996). Crystal  
14 structure of the *Aequorea victoria* green fluorescent protein. *Science* 273, 1392-1395.
- 15 Pertz, O., Hodgson, L., Klemke, R.L., and Hahn, K.M. (2006). Spatiotemporal dynamics of RhoA  
16 activity in migrating cells. *Nature* 440, 1069-1072.
- 17 Pfeiffer, B.D., Ngo, T.T., Hibbard, K.L., Murphy, C., Jenett, A., Truman, J.W., and Rubin, G.M.  
18 (2010). Refinement of tools for targeted gene expression in *Drosophila*. *Genetics* 186, 735-755.
- 19 Quinones-Coello, A.T., Petrella, L.N., Ayers, K., Melillo, A., Mazzalupo, S., Hudson, A.M.,  
20 Wang, S., Castiblanco, C., Buszczak, M., Hoskins, R.A., *et al.* (2007). Exploring strategies for  
21 protein trapping in *Drosophila*. *Genetics* 175, 1089-1104.
- 22 Rolland, T., Tasan, M., Charlotiaux, B., Pevzner, S.J., Zhong, Q., Sahni, N., Yi, S., Lemmens,  
23 I., Fontanillo, C., Mosca, R., *et al.* (2014). A proteome-scale map of the human interactome  
24 network. *Cell* 159, 1212-1226.
- 25 Sanes, J.R., and Lichtman, J.W. (1999). Can molecules explain long-term potentiation? *Nat*  
26 *Neurosci* 2, 597-604.
- 27 Sarov, M., Murray, J.I., Schanze, K., Pozniakovski, A., Niu, W., Angermann, K., Hasse, S.,  
28 Rupprecht, M., Vinis, E., Tinney, M., *et al.* (2012). A genome-scale resource for *in vivo* tag-  
29 based protein function exploration in *C. elegans*. *Cell* 150, 855-866.
- 30 Shaner, N.C., Campbell, R.E., Steinbach, P.A., Giepmans, B.N., Palmer, A.E., and Tsien, R.Y.  
31 (2004). Improved monomeric red, orange and yellow fluorescent proteins derived from  
32 *Discosoma* sp. red fluorescent protein. *Nat Biotechnol* 22, 1567-1572.
- 33 Sharifai, N., Samarajeewa, H., Kamiyama, D., Deng, T.C., Boulina, M., and Chiba, A. (2014).  
34 Imaging dynamic molecular signaling by the Cdc42 GTPase within the developing CNS. *PLoS*  
35 *One* 9, e88870.
- 36 Shcherbo, D., Shemiakina, I., Ryabova, A.V., Luker, K.E., Schmidt, B.T., Souslova, E.A.,  
37 Gorodnicheva, T.V., Strukova, L., Shidlovskiy, K.M., Britanova, O.V., *et al.* (2010). Near-infrared  
38 fluorescent proteins. *Nat Methods* 7, 827-829.
- 39 Szabad, J., Bellen, H.J., and Venken, K.J. (2012). An assay to detect *in vivo* Y chromosome  
40 loss in *Drosophila* wing disc cells. *G3* 2, 1095-1102.
- 41 Trinh le, A., Hochgreb, T., Graham, M., Wu, D., Ruf-Zamojski, F., Jayasena, C.S., Saxena, A.,  
42 Hawk, R., Gonzalez-Serricchio, A., Dixon, A., *et al.* (2011). A versatile gene trap to visualize  
43 and interrogate the function of the vertebrate proteome. *Genes Dev* 25, 2306-2320.

15 August 2019

- 1 Tsien, R.Y. (1998). The green fluorescent protein. *Annu Rev Biochem* 67, 509-544.
- 2 Venken, K., De Gendt, K., Boonen, S., Ophoff, J., Bouillon, R., Swinnen, J.V., Verhoeven, G.,  
3 and Vanderschueren, D. (2006a). Relative impact of androgen and estrogen receptor activation  
4 in the effects of androgens on trabecular and cortical bone in growing male mice: a study in the  
5 androgen receptor knockout mouse model. *Journal of bone and mineral research : the official*  
6 *journal of the American Society for Bone and Mineral Research* 21, 576-585.
- 7 Venken, K.J., He, Y., Hoskins, R.A., and Bellen, H.J. (2006b). P[acman]: a BAC transgenic  
8 platform for targeted insertion of large DNA fragments in *D. melanogaster*. *Science* 314, 1747-  
9 1751.
- 10 Venken, K.J., Schulze, K.L., Haelterman, N.A., Pan, H., He, Y., Evans-Holm, M., Carlson, J.W.,  
11 Levis, R.W., Spradling, A.C., Hoskins, R.A., *et al.* (2011). MiMIC: a highly versatile transposon  
12 insertion resource for engineering *Drosophila melanogaster* genes. *Nat Methods* 8, 737-743.
- 13 Wang, S., and Hazelrigg, T. (1994). Implications for bcd mRNA localization from spatial  
14 distribution of exu protein in *Drosophila* oogenesis. *Nature* 369, 400-403.
- 15 Yu, C., Wan, K.H., Hammonds, A.S., Stapleton, M., Carlson, J.W., and Celniker, S.E. (2011).  
16 Development of expression-ready constructs for generation of proteomic libraries. *Methods Mol*  
17 *Biol* 723, 257-272.
- 18 Zhou, Y., Morais-Cabral, J.H., Kaufman, A., and MacKinnon, R. (2001). Chemistry of ion  
19 coordination and hydration revealed by a K<sup>+</sup> channel-Fab complex at 2.0 Å resolution. *Nature*  
20 414, 43-48.
- 21
- 22

**Table 1. Tools for charting freely interacting proteins within live animals.<sup>‡</sup>**

| <b>Tools</b>                                                        | <b>How</b>                                                                                                                                                                                                                                       | <b>Why</b>                                                                                   | <b>Note</b>                                                                                                         |
|---------------------------------------------------------------------|--------------------------------------------------------------------------------------------------------------------------------------------------------------------------------------------------------------------------------------------------|----------------------------------------------------------------------------------------------|---------------------------------------------------------------------------------------------------------------------|
| (a) Genetically-encoded fluorescent proteins.                       | Fuse protein of interest (POI) to eGFP, mCherry or NirFP.                                                                                                                                                                                        | Visualize co-localization of proteins, and detect possible interaction between them by FRET. | Structural features of the $\beta$ -barrel “cage” and flexible “loop” make eGFP, mCherry and NirFP reliable labels. |
| (b) Position-specific integration of transgene by PhiC31 integrase. | <i>attP</i> sequences allows integration of eGFP-labeled constructs to the <i>attP40</i> site and mCherry-labeled constructs to the <i>VK01</i> site on chromosome 2, and the NirFP-labeled constructs to the <i>attP2</i> site on chromosome 3. | Construct single, double and triple transgenic stocks through standard genetic crosses.      | Landing sites selected are likely to be least problematic in terms of expressing labeled proteins.                  |
| (c) Expression control by GAL4 transcription factor.                | Tandem <i>UAS</i> sequence allows for expressing transgenes under the control of a <i>GAL4</i> driver.                                                                                                                                           | Control the time, place and dosage of expressing labeled proteins.                           | <i>GAL4</i> -responsive expressions typically cause no anatomical or behavioral anomalies.                          |

<sup>‡</sup> We integrate: (a) genetically encoded fluorescent proteins, (b) PhiC31 mediated genomic integration and (c) *GAL4* responsive expression control. Use of these tools is not technically limited to *Drosophila*.

**Table 2. *Drosophila* cDNA.** §

| Gene   | Gene Name                                      | cDNA<br>(Gold Source<br>Clone) | nG<br>(eGFP::ORF) | nR<br>(mCherry::ORF) | cG<br>(ORF::eGFP) | cR<br>(ORF::mCherry) | 4-<br>way | 2-<br>way | FRET |
|--------|------------------------------------------------|--------------------------------|-------------------|----------------------|-------------------|----------------------|-----------|-----------|------|
| Act42A | Actin 42A                                      | LD18090                        | UGS01407          | URS01407             | UGO01207          | URO01207             | yes       | yes       |      |
| Act5C  | Actin 5C                                       | RE02927                        | UGS01271          | URS01271             | UGO01171          | URO01171             | yes       | yes       |      |
| Actn   | alpha actinin                                  | LD37956                        |                   |                      | UGO01162          |                      |           |           |      |
| AdenoK | Adenosine Kinase                               | GH14845                        | UGS01220          | URS01220             |                   | URO01120             |           | yes       |      |
| ago    | archipelago                                    | LD21322                        | UGS01492          | URS01492             | UGO01292          | URO01292             | yes       | yes       |      |
| Agpat1 | 1-Acylglycerol-3-phosphate O-acyltransferase 1 | LD44987                        | UGS01215          |                      | UGO01322          | URO01115             |           | yes       |      |
| ALiX   | ALG-2 interacting protein X                    | LD25543                        |                   |                      | UGO01331          |                      |           |           |      |
| alph   | alphabet                                       | LD23542                        | UGS01372          | URS01372             |                   | URO01072             |           | yes       |      |
| amon   | amontillado                                    | GH12584                        |                   |                      | UGO01167          | URO01167             |           | yes       |      |
| AnxB9  | Annexin B9                                     | LD09947                        | UGS01331          | URS01331             | UGO01031          | URO01031             | yes       | yes       |      |

§ Proteins encoded by 288 sequence-validated Gold Source Clone cDNAs are each fused to either green eGFP (G) or red mCherry (R) at their amino terminus (a) or carboxyl terminus (c) (**FIG3**). Success rate for producing the transgenes in *E. coli* plasmids as 4-way tagging, *i.e.*, cG, cR, nG and nR, varied but on average was 83% (varying from 80-86% for each of the four sets); however, if one was to lower the expectation to 2-way tagging of at least one eGFP and one mCherry, regardless of their tag position for each ORF, then the success rate rose in nearly all attempts (97%). Asterisks (★) indicate the biochemically demonstrated protein-protein binding compatibility that are anticipated to cause FRET between protein pairs, *e.g.*, Cdc42-to-WASp, Cdc42-to-Par6, Cdc42-to-RhoGAP, and WASp-to-Arp3 (see **Table4**). (Note: To request any of these 953 expression clones from Berkeley *Drosophila* Genome Project at [www.fruitfly.org](http://www.fruitfly.org), both the cDNA accession number and their tag-specific expression clone number are required. **Supplementary Table** supplies a full-size Excel table of *Drosophila* cDNA.)

|             |                                                     |         |          |          |          |          |     |       |
|-------------|-----------------------------------------------------|---------|----------|----------|----------|----------|-----|-------|
| APC10       | Anaphase Promoting Complex subunit 10               | RE25242 | UGS01487 | URS01487 | UGO01287 | URO01287 | yes | yes   |
| Aplip1      | APP-like protein interacting protein 1              | GH14842 | UGS01385 | URS01385 |          | URO01085 |     | yes   |
| Aplip1      | APP-like protein interacting protein 1              | RH26053 | UGS01415 |          | UGO01215 | URO01215 |     | yes   |
| Appl        | beta amyloid protein precursor-like                 | GH04413 |          |          | UGO01244 | URO01244 |     | yes   |
| Arf51F      | ADP ribosylation factor at 51F                      | RE16882 |          |          | UGO01177 | URO01177 |     | yes   |
| Arf79F      | ADP ribosylation factor at 79F                      | LD24904 | UGS01351 | URS01351 | UGO01051 | URO01051 | yes | yes   |
| ArfGAP3     | ADP-ribosylation factor GTPase activating protein 3 | LD46935 | UGS01257 | URS01257 |          |          |     | yes   |
| Arp2        | Actin-related protein 2                             | LD18955 | UGS01357 | URS01357 |          | URO01057 |     | yes   |
| Arp3        | Actin-related protein 3                             | LD35711 | UGS01204 | URS01204 | UGO01104 |          |     | yes ★ |
| Arcp2       | Actin-related protein 2/3 complex, subunit 2        | LD29815 | UGS01202 | URS01202 | UGO01102 | URO01102 | yes | yes   |
| Arcp3B      | Actin-related protein 2/3 complex, subunit 3B       | SD24339 | UGS01472 | URS01472 | UGO01272 | URO01272 | yes | yes   |
| Arcp5       | Actin-related protein 2/3 complex, subunit 5        | RH48239 | UGS01256 | URS01256 |          | URO01156 |     | yes   |
| Ate1        | Arginyltransferase 1                                | LD23642 | UGS01423 | URS01423 | UGO01223 | URO01223 | yes | yes   |
| Ate1        | Arginyltransferase 1                                | LD33682 | UGS01435 | URS01435 | UGO01235 | URO01235 | yes | yes   |
| Atg8a       | Autophagy-related 8a                                | LD05816 | UGS01328 | URS01328 |          | URO01028 |     | yes   |
| ATPsynB     | ATP synthase, subunit B                             | RE36486 | UGS01478 | URS01478 | UGO01278 | URO01278 | yes | yes   |
| ATPsynb eta | ATP synthase, beta subunit                          | RE10864 | UGS01430 | URS01430 | UGO01230 | URO01230 | yes | yes   |
| ATPsynd     | ATP synthase, delta subunit                         | RE24457 | UGS01463 | URS01463 | UGO01263 | URO01263 | yes | yes   |

|             |                                                         |         |          |          |          |          |     |     |
|-------------|---------------------------------------------------------|---------|----------|----------|----------|----------|-----|-----|
| elta        |                                                         |         |          |          |          |          |     |     |
| ATPsynG     | ATP synthase, subunit G                                 | RE20862 | UGS01279 | URS01279 | UGO01179 |          |     | yes |
| ATPsyngamma | ATP synthase, gamma subunit                             | RE35715 | UGS01282 | URS01282 | UGO01182 | URO01182 | yes | yes |
| ATPsynO     | ATP synthase, oligomycin sensitivity conferring protein | GH01760 | UGS01378 | URS01378 | UGO01078 | URO01078 | yes | yes |
| ball        | ballchen                                                | LD09009 | UGS01237 | URS01237 | UGO01137 | URO01336 | yes | yes |
| betaTub56D  | beta-Tubulin at 56D                                     | LD43681 | UGS01406 | URS01406 |          | URO01206 |     | yes |
| betaTub85D  | beta-Tubulin at 85D                                     | GH02051 | UGS01404 |          | UGO01204 | URO01204 |     | yes |
| blw         | bellwether                                              | HL08087 | UGS01228 | URS01228 | UGO01128 | URO01128 | yes | yes |
| boi         | brother of ihog                                         | RE01910 | UGS01269 | URS01269 | UGO01169 | URO01169 | yes | yes |
| bru1        | bruno 1                                                 | LD29068 | UGS01247 | URS01247 | UGO01147 | URO01147 | yes | yes |
| bs          | blistered                                               | RE17834 | UGS01315 | URS01315 | UGO01015 | URO01306 | yes | yes |
| bsk         | basket                                                  | HL02677 | UGS01339 | URS01339 | UGO01309 |          |     | yes |
| Btk29A      | Btk family kinase at 29A                                | LD16208 |          | URS01443 | UGO01243 |          |     | yes |
| Buffy       | Buffy                                                   | AT16536 | UGS01295 | URS01295 |          | URO01195 |     | yes |
| cact        | cactus                                                  | LD10168 | UGS01317 | URS01317 |          | URO01017 |     | yes |
| CanA1       | Calcineurin A1                                          | RE54552 | UGS01468 | URS01468 | UGO01268 |          |     | yes |
| CCT6        | Chaperonin containing TCP1 subunit 6                    | GH13725 | UGS01242 | URS01242 | UGO01142 | URO01142 | yes | yes |
| Cdc23       | Cell division cycle 23                                  | LD09850 |          | URS01442 | UGO01242 | URO01242 |     | yes |
| Cdc27       | Cell division cycle 27                                  | LD12661 | UGS01473 | URS01473 | UGO01273 |          |     | yes |

|         |                           |         |          |          |          |          |     |     |
|---------|---------------------------|---------|----------|----------|----------|----------|-----|-----|
| Cdc42   | Cell division cycle 42    | HL08128 |          |          | UGO01134 | URO01134 | yes | ★   |
| CDC45L  | CDC45L                    | LD35753 | UGS01251 | URS01251 | UGO01151 | URO01151 | yes | yes |
| Cdk1    | Cyclin-dependent kinase 1 | LD38718 | UGS01365 | URS01365 |          | URO01065 | yes |     |
| CG10077 | -                         | GH10652 |          |          | UGO01252 | URO01252 | yes |     |
| CG10298 | -                         | GH28351 | UGS01471 | URS01471 |          | URO01271 | yes |     |
| CG11583 | -                         | LD22010 | UGS01350 | URS01350 | UGO01050 | URO01050 | yes | yes |
| CG11807 | -                         | SD03973 | UGS01219 | URS01219 | UGO01119 | URO01119 | yes | yes |
| CG13887 | -                         | LP10861 | UGS01360 | URS01360 | UGO01060 | URO01060 | yes | yes |
| CG17739 | -                         | GH02025 | UGS01243 | URS01243 | UGO01143 | URO01143 | yes | yes |
| CG1909  | -                         | GH22690 | UGS01246 | URS01246 |          | URO01146 | yes |     |
| CG2862  | -                         | RH49748 | UGS01292 | URS01292 | UGO01335 | URO01192 | yes | yes |
| CG3008  | -                         | RE33807 | UGS01464 |          | UGO01264 | URO01264 | yes |     |
| CG31457 | -                         | LD10183 | UGS01332 | URS01332 | UGO01032 | URO01032 | yes | yes |
| CG32137 | -                         | RE18568 | UGS01462 | URS01462 | UGO01262 | URO01262 | yes | yes |
| CG3529  | -                         | GH05942 | UGS01382 | URS01382 | UGO01082 | URO01082 | yes | yes |
| CG3788  | -                         | AT31332 | UGS01401 | URS01401 | UGO01201 |          | yes |     |
| CG42540 | -                         | RE02540 | UGS01434 | URS01434 | UGO01234 | URO01234 | yes | yes |
| CG7220  | -                         | AT19555 | UGS01403 | URS01403 | UGO01203 | URO01203 | yes | yes |
| CG8199  | -                         | GH19141 | UGS01388 | URS01388 | UGO01088 | URO01088 | yes | yes |
| CG9281  | -                         | LD02975 | UGS01239 | URS01239 | UGO01139 | URO01139 | yes | yes |
| Chc     | Clathrin heavy chain      | LD43101 | UGS01486 | URS01486 |          |          | yes |     |

|              |                                           |         |          |          |          |          |     |     |
|--------------|-------------------------------------------|---------|----------|----------|----------|----------|-----|-----|
| cin          | cinnamon                                  | GH09380 |          |          | UGO01250 | URO01250 | yes |     |
| Cka          | Connector of kinase to AP-1               | LD41760 |          |          | UGO01163 | URO01163 | yes |     |
| Ckllbeta     | Casein kinase II beta subunit             | RE31047 | UGS01281 | URS01281 | UGO01181 | URO01342 | yes | yes |
| Cortactin    | Cortactin                                 | LD29964 | UGS01248 | URS01248 |          | URO01148 | yes |     |
| COX4L        | Cytochrome c oxidase subunit 4-like       | AT07685 | UGS01293 | URS01293 | UGO01193 | URO01193 | yes | yes |
| Crk          | Crk oncogene                              | RE60886 |          | URS01418 | UGO01218 | URO01218 | yes |     |
| csul         | capsulein                                 | LD07634 | UGS01408 | URS01408 | UGO01208 | URO01208 | yes | yes |
| csw          | corkscrew                                 | LD22829 | UGS01235 | URS01235 | UGO01135 | URO01135 | yes | yes |
| CtsB1        | Cathepsin B1                              | GH06546 | UGS01383 | URS01383 |          | URO01083 | yes |     |
| CycA         | Cyclin A                                  | LD44443 | UGS01212 | URS01212 | UGO01112 |          | yes |     |
| CycC         | Cyclin C                                  | LD35705 | UGS01358 | URS01358 | UGO01311 | URO01058 | yes | yes |
| CycD         | Cyclin D                                  | LD22957 |          | URS01371 |          | URO01071 |     |     |
| CycG         | Cyclin G                                  | LD46284 |          | URS01429 | UGO01229 |          | yes |     |
| Diap2        | Death-associated inhibitor of apoptosis 2 | LD34777 |          | URS01203 | UGO01103 |          | yes |     |
| dj-1 $\beta$ | #N/A                                      | GH09983 | UGS01362 |          | UGO01062 | URO01062 | yes |     |
| dnr1         | defense repressor 1                       | LD18186 |          | URS01441 | UGO01241 | URO01241 | yes |     |
| dock         | dreadlocks                                | LD42588 | UGS01209 | URS01209 | UGO01109 | URO01109 | yes | yes |
| drk          | downstream of receptor kinase             | LD12029 | UGS01238 | URS01238 | UGO01138 | URO01138 | yes | yes |
| Dsor1        | Downstream of raf1                        | LD41207 | UGS01252 |          | UGO01152 | URO01152 | yes |     |
| Dsp1         | Dorsal switch protein 1                   | GM02110 | UGS01341 | URS01341 | UGO01041 | URO01314 | yes | yes |



|              |                                              |              |          |          |          |          |     |     |
|--------------|----------------------------------------------|--------------|----------|----------|----------|----------|-----|-----|
| E(z)         | Enhancer of zeste                            | LD30505      | UGS01322 | URS01322 |          | URO01022 | yes |     |
| Eaat2        | Excitatory amino acid transporter 2          | GH09856<br>* | UGS01421 | URS01421 | UGO01221 | URO01221 | yes | yes |
| eIF4B        | eukaryotic translation initiation factor 4B  | RE54950      | UGS01326 | URS01326 | UGO01026 | URO01310 | yes | yes |
| eIF4E1       | eukaryotic translation initiation factor 4E1 | RE36735      | UGS01417 | URS01417 | UGO01217 | URO01217 | yes | yes |
| Ent1         | Equilibrative nucleoside transporter 1       | LD19162      | UGS01333 | URS01333 |          | URO01033 | yes |     |
| exd          | extradenticle                                | LD03509      | UGS01305 | URS01305 | UGO01005 | URO01005 | yes | yes |
| FeCH         | Ferrochelatase                               | GH01314      | UGS01377 | URS01377 | UGO01317 | URO01324 | yes | yes |
| FeCH         | Ferrochelatase                               | SD11336      | UGS01426 | URS01426 | UGO01226 |          | yes |     |
| Flo1         | Flotillin 1                                  | SD10657      |          | URS01447 | UGO01247 | URO01247 | yes |     |
| Flo2         | Flotillin 2                                  | LP11503      | UGS01223 | URS01223 | UGO01123 |          | yes |     |
| Flo2         | Flotillin 2                                  | RE74011      |          | URS01431 | UGO01231 |          | yes |     |
| flw          | flapwing                                     | GH05039      |          | URS01494 | UGO01294 | URO01294 | yes |     |
| Fnta         | Farnesyl transferase alpha                   | LD26412      | UGS01366 | URS01366 | UGO01312 | URO01066 | yes | yes |
| fzr          | fizzy-related                                | GH07620      | UGS01411 | URS01411 | UGO01211 | URO01211 | yes | yes |
| Gad1         | Glutamic acid decarboxylase 1                | HL02049      | UGS01344 | URS01344 |          | URO01044 | yes |     |
| Galpai       | G protein alpha i subunit                    | LD22201      | UGS01370 | URS01370 | UGO01070 | URO01320 | yes | yes |
| Galphao      | G protein alpha o subunit                    | GM01620      |          | URS01340 | UGO01040 | URO01040 | yes |     |
| Galphas      | G protein alpha s subunit                    | LD26182      |          | URS01229 | UGO01129 | URO01129 | yes |     |
| gammaC<br>OP | Coat Protein (coatomer) gamma                | RE37840      | UGS01233 | URS01233 | UGO01326 |          | yes |     |

|          |                                                |         |          |          |          |          |     |     |
|----------|------------------------------------------------|---------|----------|----------|----------|----------|-----|-----|
| Gbeta13F | G protein beta-subunit 13F                     | LD25526 | UGS01394 |          | UGO01094 | URO01094 |     | yes |
| Gbeta5   | Gbeta5                                         | RH17413 | UGS01289 | URS01289 | UGO01189 | URO01344 | yes | yes |
| Gdi      | GDP dissociation inhibitor                     | LP03430 |          |          | UGO01012 | URO01305 |     | yes |
| GMF      | Glia maturation factor                         | RE40543 | UGS01477 | URS01477 | UGO01277 | URO01277 | yes | yes |
| Gp93     | Glycoprotein 93                                | LD23641 | UGS01485 | URS01485 |          | URO01285 |     | yes |
| grn      | grain                                          | RE40104 | UGS01309 | URS01309 |          | URO01303 |     | yes |
| gsb-n    | gooseberry-neuro                               | RE64348 | UGS01321 | URS01321 |          | URO01021 |     | yes |
| gus      | gustavus                                       | LD34464 | UGS01224 | URS01224 | UGO01124 | URO01124 | yes | yes |
| Gyg      | Glycogenin                                     | RE02181 | UGS01270 | URS01270 | UGO01170 | URO01170 | yes | yes |
| h        | hairy                                          | RE40955 | UGS01303 | URS01303 | UGO01003 | URO01003 | yes | yes |
| HDAC1    | Histone deacetylase 1                          | GM14158 | UGS01368 | URS01368 | UGO01068 | URO01068 | yes | yes |
| HDAC3    | Histone deacetylase 3                          | LD23745 | UGS01373 | URS01373 |          | URO01321 |     | yes |
| HDAC6    | Histone deacetylase 6                          | LD43531 | UGS01455 | URS01455 | UGO01255 |          |     | yes |
| Hex-C    | Hexokinase C                                   | RH33703 | UGS01291 | URS01291 | UGO01191 |          |     | yes |
| Hmgs     | HMG Coenzyme A synthase                        | LD26976 | UGS01201 | URS01201 | UGO01101 | URO01101 | yes | yes |
| Hnf4     | Hepatocyte nuclear factor 4                    | RE09535 |          | URS01311 | UGO01011 | URO01011 |     | yes |
| Hpd      | 4-hydroxyphenylpyruvate dioxygenase            | GH03058 | UGS01386 | URS01386 | UGO01086 | URO01326 | yes | yes |
| Hpd      | 4-hydroxyphenylpyruvate dioxygenase            | GH11957 | UGS01419 | URS01419 | UGO01219 | URO01219 | yes | yes |
| Hr96     | Hormone receptor-like in 96                    | GH14435 | UGS01319 | URS01319 |          | URO01309 |     | yes |
| Hrb87F   | Heterogeneous nuclear ribonucleoprotein at 87F | LD32727 | UGS01420 | URS01420 | UGO01220 | URO01220 | yes | yes |

|              |                               |         |          |          |          |          |     |     |
|--------------|-------------------------------|---------|----------|----------|----------|----------|-----|-----|
| HtrA2        | HTRA2-related serine protease | AT14262 | UGS01294 | URS01294 | UGO01194 | URO01194 | yes | yes |
| I-2          | Inhibitor-2                   | LD47783 | UGS01493 | URS01493 | UGO01293 | URO01293 | yes | yes |
| ICA69        | Islet cell autoantigen 69 kDa | GH23156 | UGS01389 | URS01389 | UGO01089 |          |     | yes |
| Ilk          | Integrin linked kinase        | LD24671 | UGS01375 | URS01375 | UGO01316 | URO01323 | yes | yes |
| Imp          | IGF-II mRNA-binding protein   | SD07045 |          |          |          | URO01258 |     |     |
| Jra          | Jun-related antigen           | LD25202 | UGS01302 | URS01302 |          | URO01002 |     | yes |
| Klp61F       | Kinesin-like protein at 61F   | LD15641 | UGS01440 | URS01440 | UGO01240 | URO01240 | yes | yes |
| krz          | kurtz                         | LD31082 | UGS01439 | URS01439 | UGO01239 |          |     | yes |
| LamC         | Lamin C                       | LD31805 | UGS01250 | URS01250 | UGO01150 | URO01150 | yes | yes |
| lid          | little imaginal discs         | LD40310 |          |          | UGO01304 | URO01025 |     | yes |
| Liprin-alpha | Liprin-alpha                  | LD33094 |          |          | UGO01161 | URO01338 |     | yes |
| Lis-1        | Lissencephaly-1               | LD11219 | UGS01409 | URS01409 | UGO01209 | URO01209 | yes | yes |
| Lmpt         | Limpet                        | RE22626 | UGS01482 | URS01482 | UGO01282 |          |     | yes |
| loqs         | loquacious                    | RE14437 | UGS01275 | URS01275 | UGO01332 | URO01175 | yes | yes |
| Mad          | Mothers against dpp           | RE72705 | UGS01316 | URS01316 |          | URO01307 |     | yes |
| Mbs          | Myosin binding subunit        | GH16214 | UGS01445 | URS01445 | UGO01245 |          |     | yes |
| metro        | menage a trois                | GH12103 | UGS01448 | URS01448 | UGO01248 | URO01248 | yes | yes |
| mew          | multiple edematous wings      | GH14509 | UGS01258 | URS01258 | UGO01330 | URO01158 | yes | yes |
| Mkk4         | MAP kinase kinase 4           | RE70055 | UGS01232 | URS01232 |          | URO01132 |     | yes |
| MRG15        | MORF-related gene 15          | LD22902 | UGS01393 | URS01393 | UGO01093 | URO01093 | yes | yes |

|         |                                      |         |          |          |          |          |     |     |
|---------|--------------------------------------|---------|----------|----------|----------|----------|-----|-----|
| mRpL40  | mitochondrial ribosomal protein L40  | RE65766 | UGS01287 | URS01287 | UGO01334 | URO01187 | yes | yes |
| mts     | microtubule star                     | LD26077 | UGS01396 | URS01396 |          | URO01096 |     | yes |
| mys     | myspheroid                           | RE55238 | UGS01488 | URS01488 | UGO01288 | URO01288 | yes | yes |
| Nedd4   | Nedd4                                | SD04682 |          |          | UGO01165 | URO01165 |     | yes |
| Nf-YA   | Nuclear factor Y-box A               | LD21748 |          | URS01307 | UGO01007 | URO01007 |     | yes |
| Nf-YC   | Nuclear factor Y-box C               | RE43755 | UGS01310 | URS01310 | UGO01022 | URO01304 | yes | yes |
| Nmt     | N-myristoyl transferase              | GM13220 |          | URS01345 | UGO01045 | URO01315 |     | yes |
| nSyb    | neuronal Synaptobrevin               | GH04664 |          | URS01354 | UGO01054 | URO01054 |     | yes |
| nudE    | nudE                                 | LD19982 | UGS01334 | URS01334 | UGO01034 | URO01034 | yes | yes |
| Oat     | Ornithine aminotransferase precursor | GH01984 | UGS01379 | URS01379 |          | URO01079 |     | yes |
| Osbp    | Oxysterol binding protein            | LD31802 |          |          | UGO01160 | URO01160 |     | yes |
| p130CAS | p130CAS                              | GH02705 | UGS01244 | URS01244 | UGO01144 | URO01144 | yes | yes |
| p38b    | p38b MAP kinase                      | LD24658 | UGS01241 | URS01241 | UGO01141 | URO01141 | yes | yes |
| p53     | p53                                  | GH11591 | UGS01306 | URS01306 | UGO01006 | URO01006 | yes | yes |
| p53     | p53                                  | AT28346 | UGS01402 | URS01402 | UGO01202 | URO01202 | yes | yes |
| Pak3    | Pak3                                 | LD10376 | UGS01489 |          | UGO01289 | URO01289 |     | yes |
| par-6   | par-6                                | LD29223 | UGS01227 | URS01227 | UGO01325 | URO01127 | yes | yes |
| Parp    | Poly-(ADP-ribose) polymerase         | RE04933 | UGS01481 | URS01481 | UGO01281 |          |     | yes |
| parvin  | parvin                               | GH23568 | UGS01422 | URS01422 | UGO01222 | URO01222 | yes | yes |
| Pde1c   | Phosphodiesterase 1c                 | RE56844 |          |          | UGO01266 |          |     |     |
| Pdk1    | Phosphoinositide-dependent kinase 1  | LD22131 |          |          | UGO01253 | URO01253 |     | yes |

|              |                                                           |         |          |          |          |          |     |     |
|--------------|-----------------------------------------------------------|---------|----------|----------|----------|----------|-----|-----|
| Pdp1         | PAR-domain protein 1                                      | GM02880 |          |          | UGO01001 | URO01301 |     | yes |
| Pect         | Phosphoethanolamine cytidyltransferase                    | RE62261 | UGS01416 | URS01416 | UGO01216 |          |     | yes |
| Pepck2       | Phosphoenolpyruvate carboxykinase 2                       | RE12569 | UGS01460 | URS01460 | UGO01260 | URO01260 | yes | yes |
| Pex13        | Peroxin 13                                                | RE69884 | UGS01414 | URS01414 | UGO01214 | URO01214 | yes | yes |
| Pgm1         | Phosphoglucose mutase 1                                   | LD36183 | UGS01225 | URS01225 |          | URO01332 |     | yes |
| PHGPx        | PHGPx                                                     | SD18370 | UGS01412 | URS01412 | UGO01212 | URO01212 | yes | yes |
| PhKgamma     | Phosphorylase kinase gamma                                | GH28523 | UGS01392 | URS01392 |          | URO01092 |     | yes |
| Pi3K92E      | Pi3K92E                                                   | SD05105 |          |          |          | URO01296 |     |     |
| PIG-A        | Phosphatidylinositol glycan anchor biosynthesis class A   | LD44262 | UGS01211 | URS01211 |          | URO01111 |     | yes |
| Pitslre      | Pitslre                                                   | LD39519 | UGS01436 | URS01436 | UGO01236 | URO01236 | yes | yes |
| Pka-C1       | Protein kinase, cAMP-dependent, catalytic subunit 1       | LD13640 | UGS01342 | URS01342 | UGO01042 | URO01042 | yes | yes |
| Pka-R1       | Protein kinase, cAMP-dependent, regulatory subunit type 1 | LD43873 |          | URS01210 |          | URO01110 |     |     |
| Pka-R2       | Protein kinase, cAMP-dependent, regulatory subunit type 2 | LD44591 |          | URS01484 |          | URO01284 |     |     |
| Pkg21D       | Protein kinase, cGMP-dependent at 21D                     | GH03852 | UGS01245 | URS01245 | UGO01329 | URO01145 | yes | yes |
| Pnn          | Pinin                                                     | RE29832 |          | URS01280 | UGO01333 | URO01180 |     | yes |
| Pp1-13C      | Protein phosphatase 1 at 13C                              | GH10637 | UGS01387 | URS01387 | UGO01087 |          |     | yes |
| Pp1alpha-96A | Protein phosphatase 1alpha at 96A                         | LD14639 | UGS01410 | URS01410 | UGO01210 | URO01210 | yes | yes |

|         |                                  |         |          |          |          |          |     |     |
|---------|----------------------------------|---------|----------|----------|----------|----------|-----|-----|
| Pp4-19C | Protein phosphatase 19C          | RE58406 | UGS01286 | URS01286 | UGO01186 | URO01343 | yes | yes |
| prd     | paired                           | GH22686 |          | URS01320 |          | URO01020 |     |     |
| primo-2 | primo-2                          | AT28881 | UGS01296 | URS01296 | UGO01196 | URO01196 | yes | yes |
| Psn     | Presenilin                       | LD23505 | UGS01483 | URS01483 | UGO01283 | URO01283 | yes | yes |
| PSR     | phosphatidylserine receptor      | LD25827 | UGS01395 | URS01395 | UGO01095 | URO01095 | yes | yes |
| Ptp61F  | Protein tyrosine phosphatase 61F | LP01280 | UGS01255 | URS01255 | UGO01155 | URO01155 | yes | yes |
| Pu      | Punch                            | LD37787 | UGS01424 | URS01424 | UGO01224 |          |     | yes |
| Rab10   | Rab10                            | LD39986 | UGS01446 | URS01446 | UGO01246 | URO01246 | yes | yes |
| Rab11   | Rab11                            | GM06568 | UGS01335 | URS01335 | UGO01307 | URO01035 | yes | yes |
| Rab18   | Rab18                            | GH11193 | UGS01355 | URS01355 | UGO01055 | URO01055 | yes | yes |
| Rab2    | Rab2                             | GH01619 | UGS01361 | URS01361 |          | URO01317 |     | yes |
| Rab21   | Rab21                            | RE42508 | UGS01285 | URS01285 | UGO01185 |          |     | yes |
| Rab23   | Rab23                            | RH23273 |          | URS01290 |          |          |     |     |
| Rab3    | Rab3                             | LP05860 | UGS01454 |          | UGO01254 | URO01254 |     | yes |
| Rab30   | Rab30                            | RE14786 | UGS01276 | URS01276 | UGO01176 | URO01176 | yes | yes |
| Rab32   | Rab32                            | LD04613 | UGS01330 | URS01330 | UGO01030 | URO01030 | yes | yes |
| Rab35   | Rab35                            | LD21953 | UGS01369 | URS01369 | UGO01069 | URO01319 | yes | yes |
| Rab5    | Rab5                             | GH24702 | UGS01391 | URS01391 | UGO01091 | URO01091 | yes | yes |
| Rab6    | Rab6                             | GH09086 | UGS01384 | URS01384 |          | URO01084 |     | yes |
| Rab7    | Rab7                             | GH03685 | UGS01380 | URS01380 |          | URO01080 |     | yes |
| Rab8    | Rab8                             | LD44762 | UGS01214 | URS01214 | UGO01321 |          |     | yes |

|              |                                                       |         |          |          |          |          |     |     |   |
|--------------|-------------------------------------------------------|---------|----------|----------|----------|----------|-----|-----|---|
| Rab9         | Rab9                                                  | RE17845 | UGS01278 | URS01278 | UGO01178 |          |     | yes |   |
| Rab9Fb       | Rab at 9Fb                                            | IP08727 | UGS01427 | URS01427 | UGO01227 | URO01227 | yes | yes |   |
| RabX1        | RabX1                                                 | LD47384 | UGS01217 | URS01217 |          | URO01117 |     | yes |   |
| RabX6        | RabX6                                                 | RE70650 | UGS01469 | URS01469 | UGO01269 | URO01269 | yes | yes |   |
| Rac1         | Rac1                                                  | LD34217 | UGS01438 | URS01438 |          | URO01238 |     | yes | ★ |
| Rac2         | Rac2                                                  | GM13874 | UGS01346 | URS01346 | UGO01046 | URO01046 | yes | yes |   |
| Rack1        | Receptor of activated protein kinase C<br>1           | RE74715 |          | URS01288 | UGO01188 | URO01188 |     | yes |   |
| Raf          | Raf oncogene                                          | GH03557 | UGS01490 | URS01490 | UGO01290 | URO01290 | yes | yes |   |
| Rala         | Ras-like protein A                                    | LD21679 | UGS01349 | URS01349 | UGO01049 | URO01049 | yes | yes |   |
| Ran          | Ran                                                   | GM14354 | UGS01348 | URS01348 |          | URO01048 |     | yes |   |
| Rap1         | Rap1 GTPase                                           | RE42418 | UGS01284 | URS01284 | UGO01184 | URO01184 | yes | yes |   |
| Rap2l        | Ras-associated protein 2-like                         | RE63021 | UGS01476 | URS01476 | UGO01276 |          |     | yes |   |
| ras          | raspberry                                             | LD36080 | UGS01495 |          | UGO01295 | URO01295 |     | yes |   |
| Ras64B       | Ras oncogene at 64B                                   | RE36103 | UGS01465 | URS01465 | UGO01265 | URO01265 | yes | yes |   |
| Rel          | Relish                                                | GH01881 | UGS01313 | URS01313 | UGO01013 | URO01013 | yes | yes |   |
| Rho1         | Rho1                                                  | GH20776 | UGS01364 | URS01364 | UGO01064 | URO01318 | yes | yes |   |
| RhoGAP<br>5A | Rho GTPase activating protein at 5A                   | SD02309 | UGS01218 | URS01218 | UGO01118 | URO01330 | yes | yes | ★ |
| RhoGDI       | RhoGDI                                                | LD16419 | UGS01337 | URS01337 |          | URO01312 |     | yes |   |
| RnrS         | Ribonucleoside diphosphate reductase<br>small subunit | LD41588 | UGS01207 | URS01207 | UGO01107 | URO01107 | yes | yes |   |

|         |                                                 |              |          |          |          |          |     |     |
|---------|-------------------------------------------------|--------------|----------|----------|----------|----------|-----|-----|
| RpL10   | Ribosomal protein L10                           | RE02339      | UGS01433 | URS01433 |          | URO01233 | yes |     |
| RpL13A  | Ribosomal protein L13A                          | GM13948      | UGS01347 | URS01347 | UGO01310 | URO01047 | yes | yes |
| RpL40   | Ribosomal protein L40                           | RE10554      | UGS01272 | URS01272 | UGO01172 | URO01172 | yes | yes |
| RpS6    | Ribosomal protein S6                            | LD31286      | UGS01230 | URS01230 |          | URO01334 | yes |     |
| rush    | rush hour                                       | GH19261      | UGS01405 |          | UGO01205 | URO01205 | yes |     |
| Sam-S   | S-adenosylmethionine Synthetase                 | LD40460      | UGS01428 | URS01428 | UGO01228 | URO01228 | yes | yes |
| scramb1 | scramblase 1                                    | GM13876      |          | URS01367 |          | URO01067 |     |     |
| sgg     | shaggy                                          | LD44595      | UGS01213 | URS01213 | UGO01113 | URO01113 | yes | yes |
| sgl     | sugarless                                       | SD09476      | UGS01236 | URS01236 |          | URO01136 | yes |     |
| shtd    | shattered                                       | LD37115*     | UGS01206 | URS01206 | UGO01319 | URO01106 | yes | yes |
| sina    | seven in absentia                               | HL08111      | UGS01254 |          | UGO01154 | URO01154 | yes |     |
| Sk1     | Sphingosine kinase 1                            | RE64552      | UGS01467 |          | UGO01267 | URO01267 | yes |     |
| Skp2    | S-phase kinase-associated protein 2             | GM13370<br>* | UGS01221 | URS01221 |          | URO01121 | yes |     |
| SkpB    | SKP1-related B                                  | IP02725      | UGS01479 | URS01479 |          | URO01279 | yes |     |
| slmb    | supernumerary limbs                             | LD08669      | UGS01240 | URS01240 | UGO01140 | URO01140 | yes | yes |
| Smox    | Smad on X                                       | LD15813      |          |          | UGO01018 | URO01308 | yes |     |
| sn      | singed                                          | RH62992      | UGS01470 | URS01470 | UGO01270 | URO01270 | yes | yes |
| Sod2    | Superoxide dismutase 2 (Mn)                     | GH02759      | UGS01352 | URS01352 | UGO01052 | URO01052 | yes | yes |
| Spps    | Sp1-like factor for pairing sensitive-silencing | LD04007      | UGS01323 | URS01323 |          | URO01023 | yes |     |
| Sptr    | Sepiapterin reductase                           | GH04031      | UGS01353 |          | UGO01053 | URO01053 | yes |     |



|             |                                               |         |          |          |          |          |     |     |
|-------------|-----------------------------------------------|---------|----------|----------|----------|----------|-----|-----|
| sqa         | spaghetti-squash activator                    | GH17420 | UGS01449 | URS01449 | UGO01249 | URO01249 | yes | yes |
| sqh         | spaghetti squash                              | LD14743 | UGS01231 | URS01231 | UGO01131 | URO01335 | yes | yes |
| Src64B      | Src oncogene at 64B                           | LD30429 |          |          | UGO01291 |          |     |     |
| SREBP       | Sterol regulatory element binding protein     | LP12374 | UGS01314 |          | UGO01014 | URO01014 |     | yes |
| STUB1       | STIP1 homology and U-box containing protein 1 | RE01069 | UGS01268 | URS01268 | UGO01168 | URO01168 | yes | yes |
| Su(var)2-10 | Suppressor of variegation 2-10                | RE73180 | UGS01474 | URS01474 | UGO01274 |          |     | yes |
| Su(var)2-10 | Suppressor of variegation 2-10                | RE55465 | UGS01437 | URS01437 | UGO01237 | URO01237 | yes | yes |
| Su(var)3-3  | Suppressor of variegation 3-3                 | LD45081 | UGS01264 | URS01264 | UGO01164 |          |     | yes |
| Su(z)12     | Su(z)12                                       | SD04959 |          |          | UGO01166 | URO01166 |     | yes |
| Swip-1      | Swiprosin-1                                   | SD04693 | UGS01226 | URS01226 | UGO01126 | URO01333 | yes | yes |
| Syb         | Synaptobrevin                                 | SD05285 | UGS01425 | URS01425 | UGO01225 | URO01225 | yes | yes |
| Synd        | Syndapin                                      | LD46328 |          | URS01216 | UGO01323 | URO01116 |     | yes |
| Syx1A       | Syntaxin 1A                                   | LD43943 | UGS01222 | URS01222 | UGO01122 | URO01122 | yes | yes |
| Tace        | Tace                                          | RE65757 | UGS01413 | URS01413 | UGO01213 | URO01213 | yes | yes |
| Tak1        | TGF- $\beta$ activated kinase 1               | LD42274 | UGS01253 | URS01253 | UGO01153 | URO01153 | yes | yes |
| Tango4      | Transport and Golgi organization 4            | LD24662 |          | URS01374 |          | URO01322 |     |     |
| Taz         | Tafazzin                                      | RE14108 | UGS01274 | URS01274 |          | URO01341 |     | yes |
| TBCB        | tubulin-binding cofactor B                    | LD45244 | UGS01359 | URS01359 | UGO01059 | URO01059 | yes | yes |

|           |                                        |         |          |          |          |          |     |     |
|-----------|----------------------------------------|---------|----------|----------|----------|----------|-----|-----|
| Tbp       | TATA binding protein                   | LD44083 | UGS01304 | URS01304 | UGO01004 | URO01004 | yes | yes |
| Tcs3      | Tcs3                                   | RE13621 | UGS01273 | URS01273 | UGO01173 | URO01340 | yes | yes |
| TfAP-2    | Transcription factor AP-2              | RE17884 | UGS01308 | URS01308 | UGO01008 |          |     | yes |
| Tfb1      | Transcription factor B1                | SD04652 |          |          | UGO01024 | URO01024 |     | yes |
| Tg        | Transglutaminase                       | RE08173 |          | URS01432 | UGO01232 | URO01232 |     | yes |
| Tip60     | Tat interactive protein 60kDa          | LD31064 | UGS01249 | URS01249 | UGO01149 | URO01149 | yes | yes |
| tmod      | tropomodulin                           | GH23271 | UGS01390 | URS01390 | UGO01090 | URO01090 | yes | yes |
| Traf4     | TNF-receptor-associated factor 4       | LD20987 | UGS01338 | URS01338 | UGO01038 | URO01038 | yes | yes |
| Traf6     | TNF-receptor-associated factor 6       | GH01161 | UGS01376 |          | UGO01076 | URO01076 |     | yes |
| Tsc1      | Tsc1                                   | LD23779 |          | URS01451 | UGO01251 | URO01251 |     | yes |
| Tsp66E    | Tetraspanin 66E                        | RE39068 | UGS01283 | URS01283 | UGO01183 | URO01183 | yes | yes |
| Tsp96F    | Tetraspanin 96F                        | LD19727 | UGS01327 | URS01327 |          | URO01027 |     | yes |
| Ubc10     | Ubiquitin conjugating enzyme 10        | RE47264 | UGS01475 | URS01475 | UGO01275 | URO01275 | yes | yes |
| Ube3a     | Ubiquitin protein ligase E3A           | LD21888 | UGS01459 | URS01459 | UGO01259 | URO01259 | yes | yes |
| Ufd1-like | Ubiquitin fusion-degradation 1-like    | GH18603 | UGS01356 | URS01356 | UGO01056 | URO01316 | yes | yes |
| Uros1     | Uroporphyrinogen III synthase 1        | GH17465 | UGS01363 | URS01363 |          | URO01063 |     | yes |
| usp       | ultraspiracle                          | LD09973 | UGS01343 | URS01343 | UGO01043 |          |     | yes |
| Vav       | Vav guanine nucleotide exchange factor | LD25754 | UGS01456 | URS01456 | UGO01256 |          |     | yes |
| Vinc      | Vinculin                               | SD03117 | UGS01457 | URS01457 | UGO01257 | URO01257 | yes | yes |
| Vps28     | Vacuolar protein sorting 28            | GH04443 | UGS01381 | URS01381 | UGO01081 |          |     | yes |

|       |                                        |         |          |          |          |          |     |     |   |
|-------|----------------------------------------|---------|----------|----------|----------|----------|-----|-----|---|
| WASp  | WASp                                   | RE12101 | UGS01461 | URS01461 | UGO01261 | URO01261 | yes | yes | ★ |
| wbl   | windbeutel                             | IP02648 | UGS01480 |          | UGO01280 | URO01280 |     | yes |   |
| Wdfy2 | WD repeat and FYVE domain containing 2 | LD41958 | UGS01208 | URS01208 | UGO01320 | URO01108 | yes | yes |   |
| Wwox  | WW domain containing oxidoreductase    | LD03827 | UGS01329 |          | UGO01305 |          |     | yes |   |
| zda   | zonda                                  | LD36412 |          | URS01205 | UGO01105 | URO01105 |     | yes |   |

**Table 3. Production steps. \*\***

| Production steps           | Attempted                                                                                                                                                                                                                         | Obtained                                                                                                        | Success                          | Note                                                                                                   |
|----------------------------|-----------------------------------------------------------------------------------------------------------------------------------------------------------------------------------------------------------------------------------|-----------------------------------------------------------------------------------------------------------------|----------------------------------|--------------------------------------------------------------------------------------------------------|
| (1) Construct production.  | 286 proteins with 4-way labeling equals a total of 1144 expression constructs.                                                                                                                                                    | 988 expression constructs.                                                                                      | 83% for 4-way.<br>97% for 2-way. | 2-way labeling is most likely sufficient for checking possible interactions <i>in vivo</i> .           |
| (2) Genome transformation. | 32 proteins (128 4-way labeled transgenes) selected from (1).                                                                                                                                                                     | All 128 homozygous single transgenic stock lines.                                                               | 100%.                            | Transformation of transgenes into the <i>Drosophila</i> genome is straightforward.                     |
| (3) Stock construction.    | Only 11 protein-protein links in (2) had their binding compatibility demonstrated biochemically; besides the Cdc42-to-WASp link (see Sharifai et al., 2014), the remaining 10 links were yet to be characterized <i>in vivo</i> . | 18 double homozygous and 4 triple homozygous stock lines (see <b>Table 4</b> ).                                 | 100%.                            | Establishing GAL4-responsive double and triple transgenic stock lines is straightforward.              |
| (4) Sample visualization.  | Triple transgenic stocks from (3) were crossed to a pan-neuronal <i>elav-GAL4</i> driver. Eggs were then collected and raised subsequently through larval stages.                                                                 | Embryos developed normally without any apparent anomaly in anatomy or behavior until third instar larval stage. | 76%.                             | Nearly the same viability as in the previous report on double transgene stocks (Sharifai et al. 2014). |

\*\* In terms of production difficulty, transgene creation step (1) is the toughest and subsequent steps (2) through (4) are all forthright. In terms of time and cost of ultimately charting the map, however, step (4) can be the most extensive. Pre-selection of protein-protein links that are likely to produce FRET in the native environment is recommended.

**Table 4. *Drosophila* stocks.** ††

| Stock | Co-expression                                                                                           | Genotype                          | FRET |
|-------|---------------------------------------------------------------------------------------------------------|-----------------------------------|------|
| 1     | Cdc42 <i>blank</i><br> | UAS-WASp::eGFP UAS- mCherry       |      |
| 2     | Cdc42 WASp<br>         | UAS-eGFP::Cdc42 UAS-mCherry::WASp | ★    |
| 3     | Cdc42 WASp<br>         | UAS-eGFP::Cdc42 UAS-WASp::mCherry | ★    |
| 4     | Cdc42 WASp<br>         | UAS-Cdc42::eGFP UAS-mCherry::WASp | ★    |
| 5     | Cdc42 WASp<br>         | UAS-Cdc42::eGFP UAS-WASp::mCherry | ★    |
| 6     | WASp Cdc42<br>         | UAS-eGFP::WASp UAS-mCherry::Cdc42 | ★    |
| 7     | WASp Cdc42<br>         | UAS-eGFP::WASp UAS-Cdc42::mCherry | ★    |
| 8     | WASp Cdc42<br>         | UAS-WASp::eGFP UAS-Cdc42::mCherry | ★    |

†† Double and triple homozygous stocks of GAL4-responsive transgenes are ready for characterizing possible interactions between Cdc42 and its effectors WASp (2-8,19), Par6 (12,14,15,19,21) or Pak1 (19). Here, multiple tag positions and FRET directionalities may be assessed for interaction between Cdc42 and WASp, and similarly for interaction between Cdc42 and Par6. In each case, the magenta box indicates whether the FRET donor, either eGFP or mCherry, possibly undergoes a decrease in fluorescence lifetime if in near field proximity to the FRET acceptor-labeled POI. An important ‘negative’ control yielding no FRET is to co-express eGFP-labeled Cdc42 along with unfused mCherry (1), which is especially important for assessing positive FRET with mCherry-labeled WASp, Par6 or RhoGAP (13). In addition to Cdc42, possible interactions between Rac1, another Rho subfamily monomeric G protein, and WASp (17,21), Par6 (16,22) or Pak1 (18) are also ready for experimentation. WASp, incidentally, has potential interaction with Arp3 (9-11). With the trio of labels, the potential of completeive interactions between a single G protein for two mutually exclusive partners Pak1 and WASp (19), or similarly between Pak1 and Par6 (20), may be revealed within the same animals. Alternatively, the same can be done for two G proteins Cdc42 and Rac1 competing for a common effector such as WASp (21) or Par6 (22). *Asterisks* (★ and ★) indicate possible detection of FRET between one or two pairs of proteins. (*Note*: To request any of these 22 double or triple transgenic homozygous stocks from Chiba lab, genotypes are required.) [\[genetics\\_table\]](#)

|    |                                                                                                        |                                                     |    |
|----|--------------------------------------------------------------------------------------------------------|-----------------------------------------------------|----|
| 9  | WASp Arp3<br>         | UAS-WASp::eGFP UAS-mCherry::Arp3                    | ★  |
| 10 | WASp Arp3<br>         | UAS-WASp::eGFP UAS-Arp3::mCherry                    | ★  |
| 11 | Arp3 WASp<br>         | UAS-Arp3::eGFP UAS-mCherry::WASp                    | ★  |
| 12 | Cdc42 Par6<br>        | UAS-eGFP::Cdc42 UAS-mCherry::Par6                   | ★  |
| 13 | Cdc42 RhoGAP<br>      | UAS-eGFP::Cdc42 UAS-mCherry::RhoGAP                 | ★  |
| 14 | Par6 Cdc42<br>        | UAS-eGFP::Par6 UAS-mCherry::Cdc42                   | ★  |
| 15 | Par6 Cdc42<br>        | UAS-mCherry::Par6 ; UAS-Cdc42::NirFP                | ★  |
| 16 | Par6 Rac1<br>         | UAS-eGFP::Par6 UAS-mCherry::Rac1                    | ★  |
| 17 | WASp Rac1<br>         | UAS-mCherry::WASp ; UAS-Rac1::NirFP                 | ★  |
| 18 | Rac1 Pak1<br>         | UAS-mCherry::Rac1 ; UAS-Pak1::NirFP                 | ★  |
| 19 | WASp Cdc42 Pak1<br>   | UAS-eGFP::WASp UAS-mCherry::Cdc42 ; UAS-NirFP::Pak1 | ★★ |
| 20 | Par6 Cdc42 Pak1<br> | UAS-eGFP::Par6 UAS-mCherry::Cdc42 ; UAS-NirFP::Pak1 | ★★ |
| 21 | Cdc42 WASp Rac1<br> | UAS-eGFP::Cdc42 UAS-mCherry::WASp ; UAS-Rac1::NirFP | ★★ |
| 22 | Cdc42 Par6 Rac1<br> | UAS-eGFP::Cdc42 UAS-mCherry::Par6 ; UAS-Rac1::NirFP | ★★ |

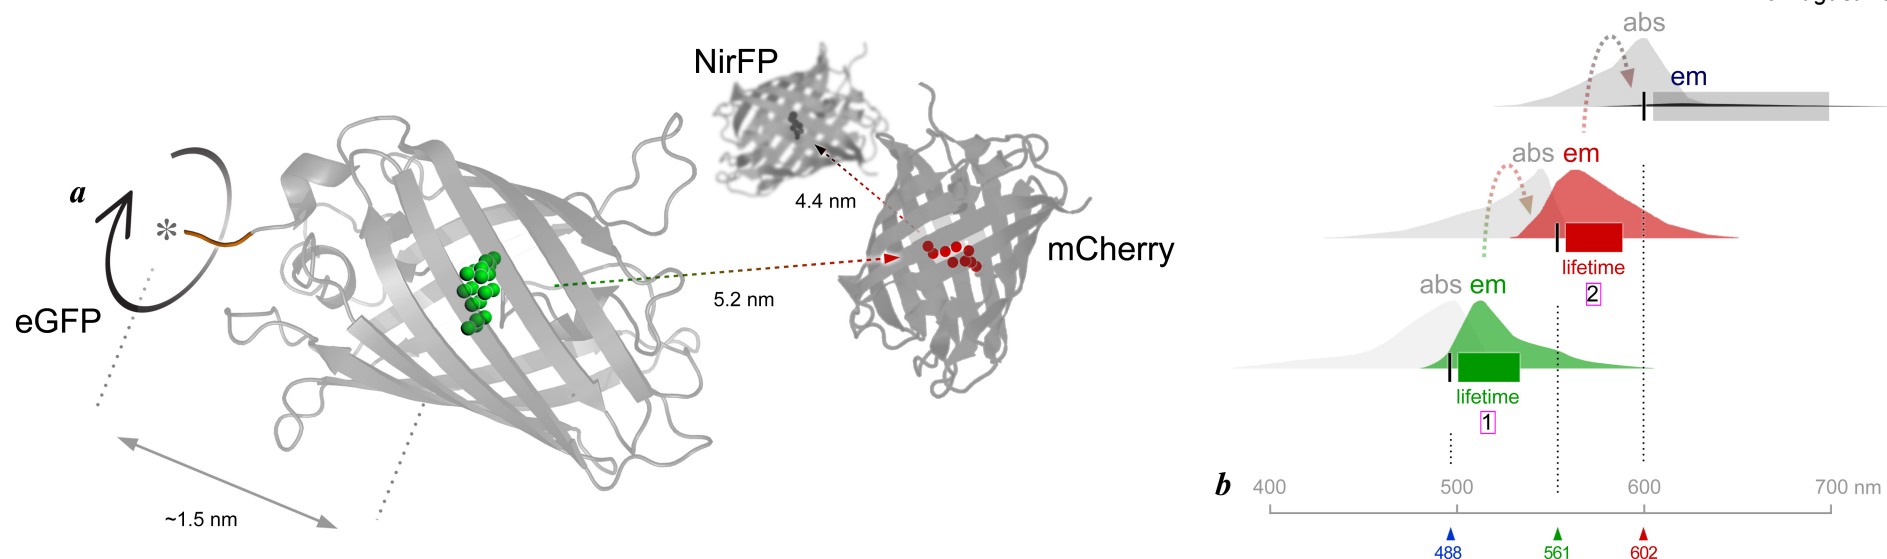

**Figure 1. Labels.** (a) Structures of fluorescent labels. Monomeric eGFP has twenty-two atoms (green) fluoresce together at the center of a “cage” — a rigid barrel structure composed of eleven anti-parallel  $\beta$  sheets. The distance from the center of this  $\alpha$  helical fluorophore to the edge of a protein of interest (gray asterisk) is about 1.5 nm. eGFP’s carboxyl terminus with an additional 17-mer polypeptide (brown) exhibits a great deal of flexibility, (circle arc). This “loop” is anticipated to randomize the polar orientation  $\kappa^2$  of eGFP in respect to the protein it labels, thereby dramatically simplifying the computation of Förster resonance energy transfer that may occur between different fluorescent labels. The emission of eGFP and the absorption of mCherry display extensive spectral overlap (see (b)), providing a possibility of FRET with the Förster distance of 5.2 nm between these two fluorophores. Monomeric mCherry also has fluorescing ions (red) surrounded by a barrel composed of anti-parallel  $\beta$  sheets. Its emission and the absorption of NirFP display generous spectral overlap (see (b)) and provide a possibility of FRET with a Förster distance of 4.4 nm between these two fluorophores. The detailed structure of NirFP remains currently unknown. (b) Spectra of fluorescent labels. With a 488 nm diode laser (blue arrowhead), eGFP fluorescence (green bar) may be examined with its lifetime  $\tau$  of 2.56 ns. Its emission (green spectrum) and the absorption of mCherry (gray spectrum) overlap. If any physical interaction between proteins A and B occurs, this induces FRET between the two fluorophores. Hence, shortening of the lifetime  $\tau$  of the FRET donor eGFP (magenta box1) signifies FRET. With a 561 nm diode laser (green arrowhead), mCherry fluorescence (red bar) may be examined with its normal lifetime  $\tau$  of 1.47 ns. Its emission (red spectrum) and the absorption of NirFP (gray spectrum) overlap. If any physical interaction occurs between proteins B and C, this induces FRET between the two fluorophores. With a 602 nm diode laser (red arrowhead), NirFP fluorescence (gray bar) may be examined. The crystal structure of NirFP is currently unavailable. [<339> green: 009900](#), [red: cc3300](#), [black: 000000](#) [labels\_new / 12>>10]

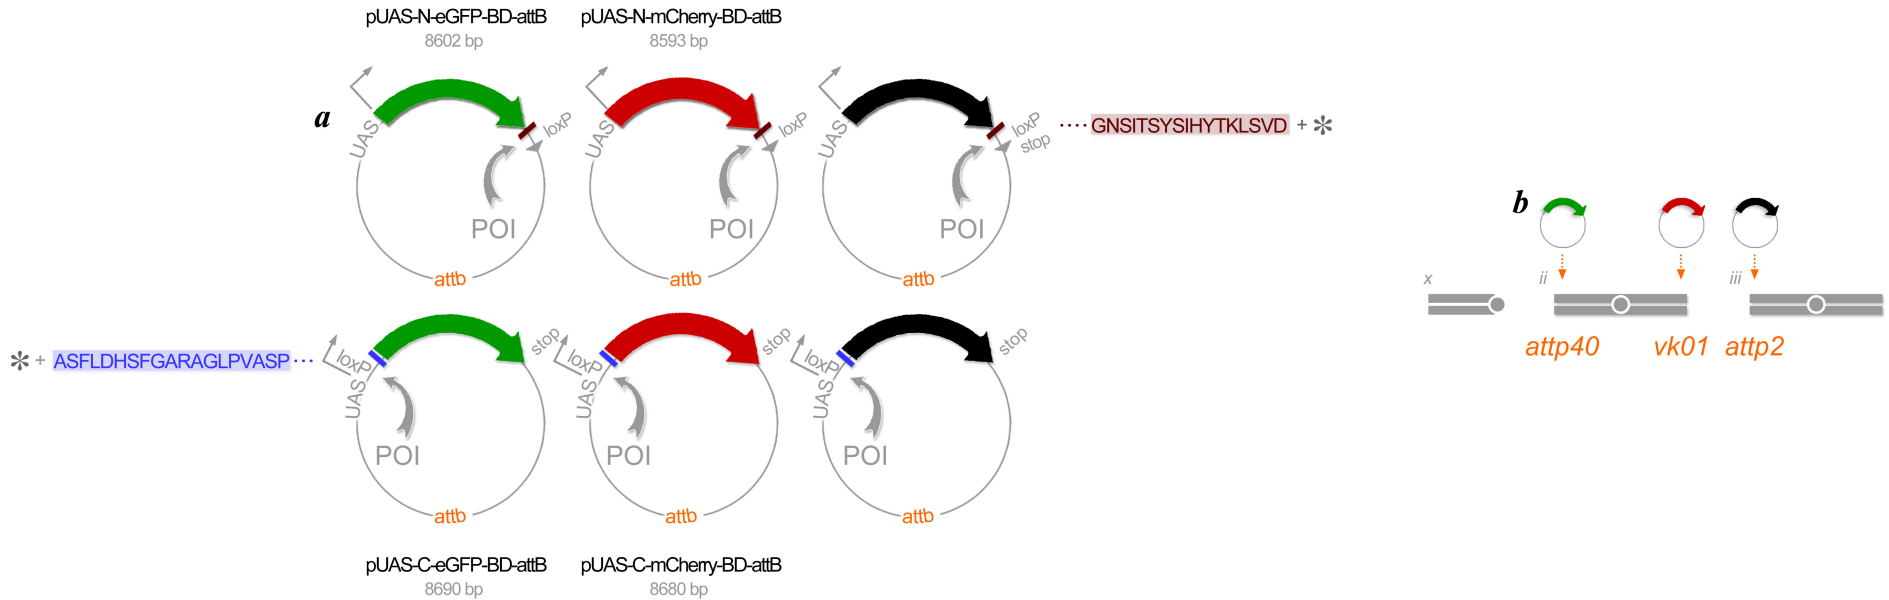

**Figure 2. Transformation.** (a) Expression vectors. Constructed in *E. coli* plasmids in six complementary manners, an individual protein of interest (POI) (gray arc) is labeled at either its amino terminus (top row) or its carboxyl terminus (bottom row) with eGFP (green), mCherry (red) or NirFP (black). A short, flexible polypeptide sequence (brown or purple bar) between the protein (gray asterisk) and its fluorescent label is added to randomize the dipole orientations when a pair of labeled proteins are being assessed for possible interaction via FRET occurrence. All these expression vectors are placed downstream of the *UAS* sequence for expressing the labeled proteins under the GAL4 expression system, and also carry the *attb* sequence for PhiC31-mediated genomic integration to specific landing sites (see (b)). All plasmids carry mini *w<sup>+</sup>* as a transformation marker (not shown). (b) Genomic integration. PhiC31 integrase enables position-specific genomic integration of all transgenes for eGFP-labeled proteins to the landing site *attp40* on the second chromosome, all transgenes for mCherry-labeled proteins to the landing site *vk01* on the chromosome 2, and all transgenes for NirFP-labeled proteins to landing site *attp2* on the chromosome 3. <186> brown: 660000, purple: 3333ff, blue 0066ff, orange ff6600 [transformation\_new/ 12>>10]



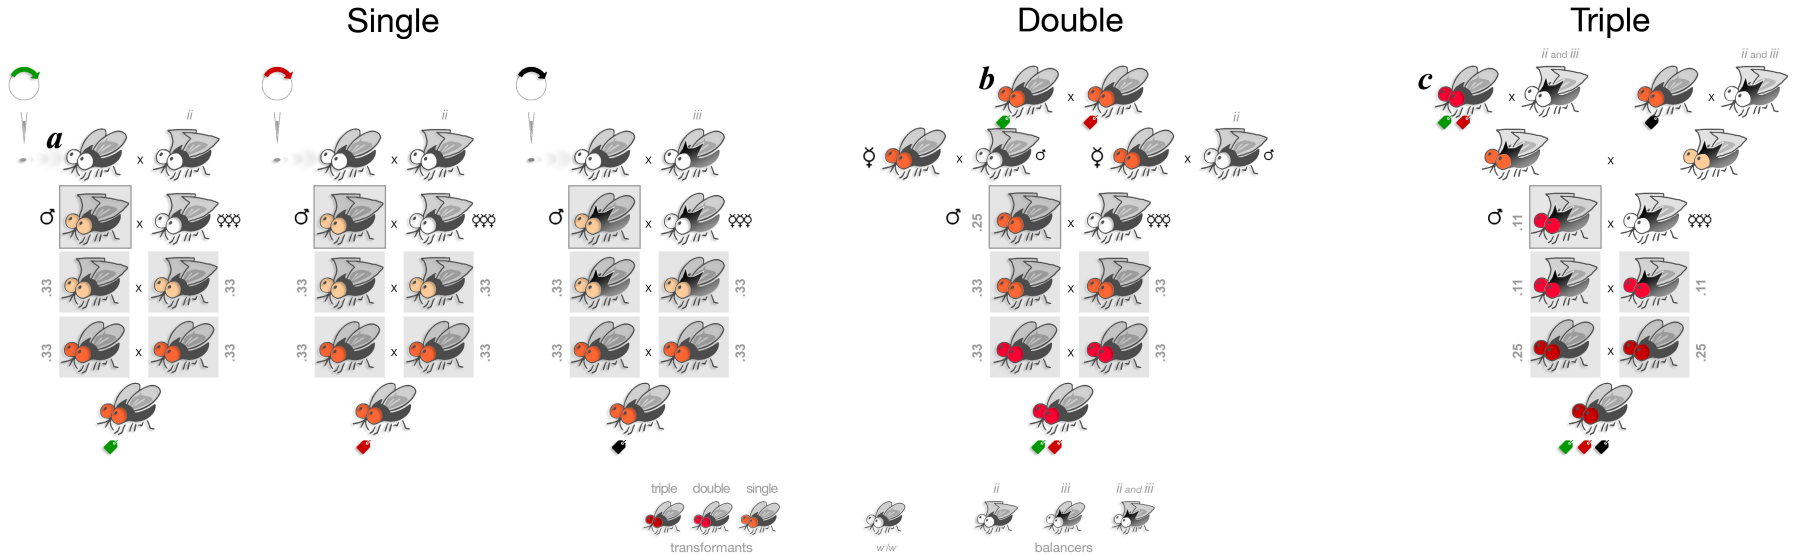

Co-localization

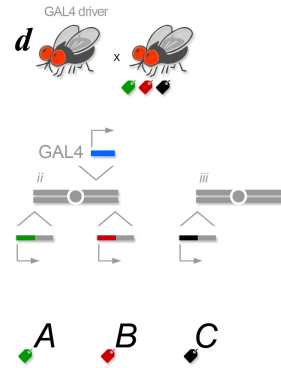

Interaction

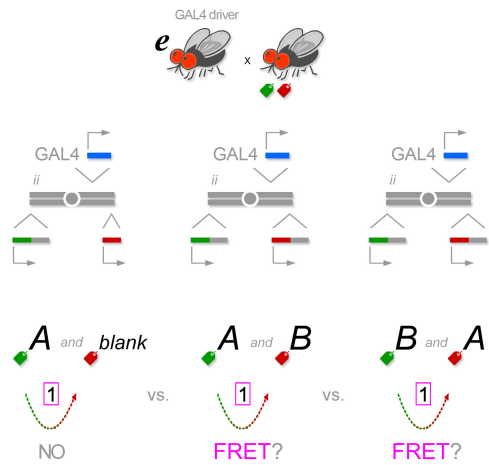

**Figure 3. *Drosophila* genetics.** (a) Single transgene stocks express proteins that are eGFP-labeled (*left*), mCherry-labeled (*center*) or NirFP-labeled (*right*). Five generations will: (1) integrate fluorescently labeled protein of interest (see **FIG2a**), (2) recover transformant as a single heterozygous male, (3) expand, (4) homozygose, then (5) stock. The PhiC31-mediated genomic integration into *Drosophila* genome (see **FIG2b**) occurs at a rate of approximately 2% in each sex. Generations (2) through (4) establish stock genotype with 100% confidence. When a given cross results in mixed genotypes, only those with certain genotypes are used (gray boxes). Probability expected using Mendelian genetics (gray number) and externally visible markers such as the color of eye and the shape of wing and/or hair on back cuticle are indicated. (b) Double transgene stocks co-express pairs of proteins that are eGFP-labeled and mCherry-labeled. Six generations will: (1) combine two transgenes on chromosome *ii* through homologous recombination, (2) cross several single females in parallel, (3) recover transformant as a single heterozygous male, (4) expand, (5) homozygose, then (6) stock. Homologous recombinations occur in the germ line of females, but balancer chromosomes suppress any such occurrence. If a virgin female mates with a male carrying the balancer for chromosome *ii*, the chance of having two transgenes on this chromosome homologously recombine with each other will be virtually 50:50. The expected offspring ratio in generation (3) will be either 50% red and 50% white in eye color with or without the balancer, or alternatively all barely red regardless of their wing being curly or not. (c) Triple transgene stocks co-express trios of proteins that are eGFP-labeled, mCherry-labeled and NirFP-labeled. Six generations will: (1) re-balance a double transgene stock on chromosome *ii* (*left*) and a single transgene stock on chromosome *iii* (*right*), (2) combine the three transgenes while suppressing any homologous recombination on either chromosome, (3) recover transformant as a single male, (4) expand, (5) homozygose, then (6) stock. Similar six generations of crosses starting with a single transgene stock of mCherry-labeled protein and a single transgene stock of NirFP-labeled protein establish a double transgene stock (not shown). All animals are of *w<sup>+</sup>/w<sup>+</sup>* background and, therefore, their eye colors reflect the number of transgenes they carry. Balancer for chromosome 2 (*ii*) carries *Cy<sup>1</sup>* mutation that causes wings to curl, and chromosome 3 (*iii*) carries *Sb<sup>1</sup>* mutation that causes hair on back cuticle to thicken. (d) Co-localization of proteins *A*, *B* and *C*. Three proteins labeled with eGFP, mCherry and NirFP, respectively, under the control of a GAL4 driver in embryos/larvae may be imaged by crossing fathers carrying the GAL4 driver to mothers from a triple transgene stock (see (c)). (e) Possible interaction between proteins *A* and *B*. Embryos/larvae may be imaged by crossing fathers carrying the GAL4 driver to mothers from a double transgene stock for labeling proteins with eGFP and mCherry (see (b)). FRET between eGFP and mCherry are considered evidence for physical interaction between the proteins *A* and *B*. Such an interaction possibility can be further confirmed through reciprocal labeling for this protein pair. Negative control (*no FRET*) to be run in parallel is eGFP-labeled protein *A* expressed along with “*blank*” cytoplasmic mCherry. [<522>](#) half:ffcc99, full:ff6633, more ff0033, even more:cc0000 [\[new\\_genetics / 12>>10\]](#)

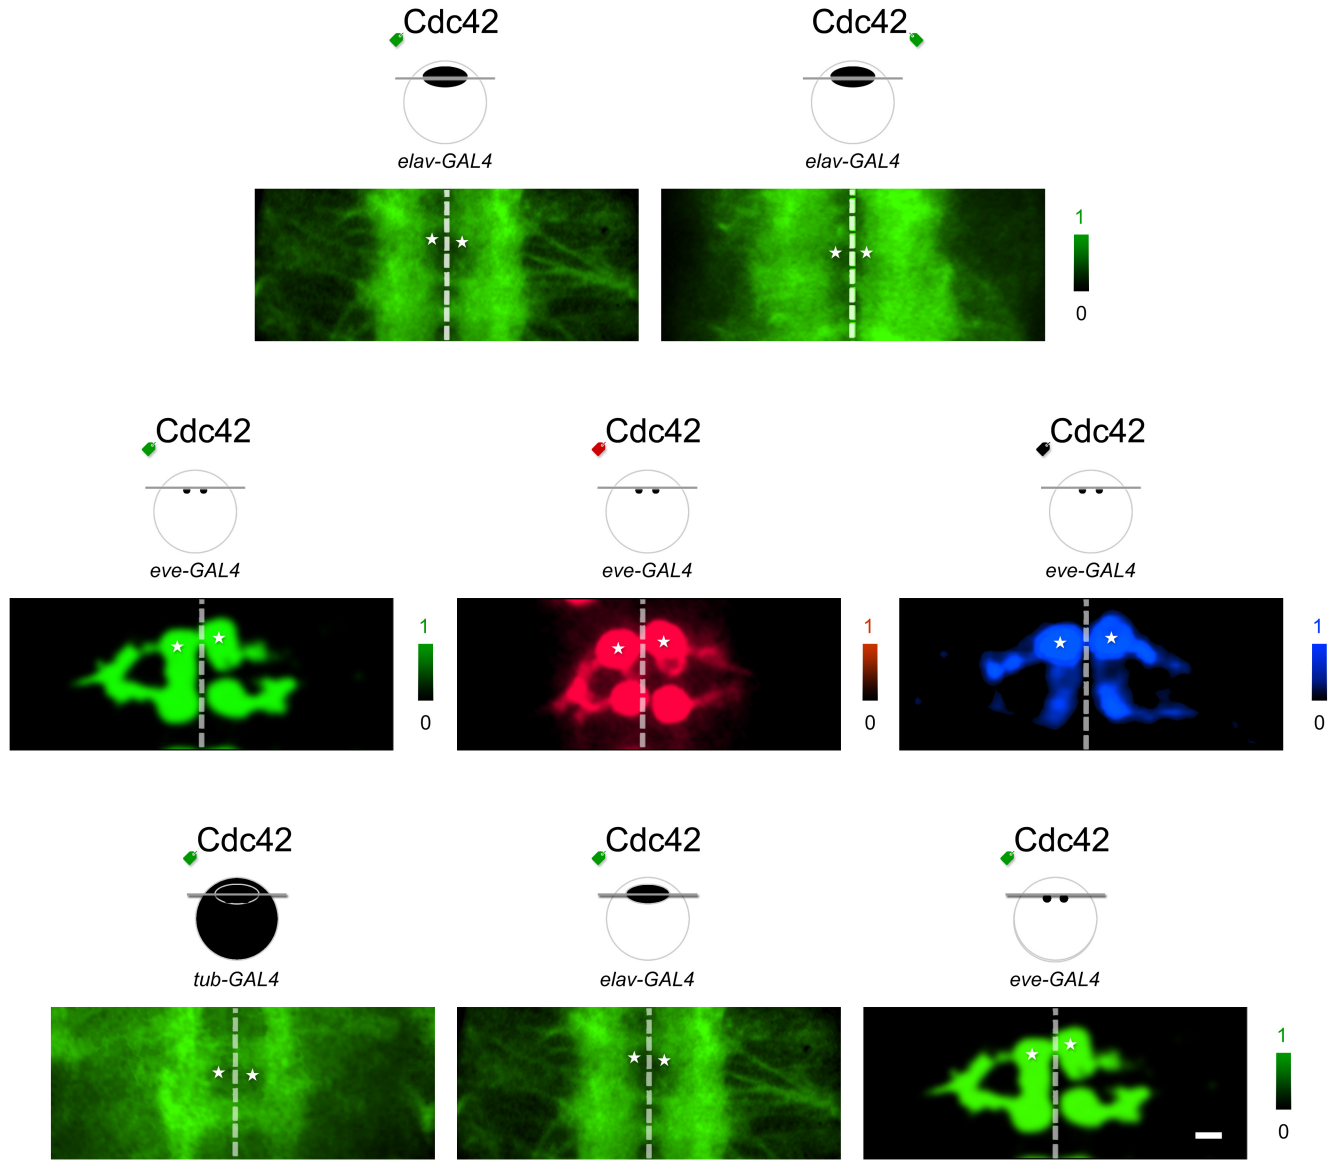

**Figure 4. Expression control.** (a) Label may be fused to either amino or carboxyl terminus of protein of interest. In our experience, both the amino or carboxyl termini labeling were indistinguishable. Genotypes: *UAS-eGFP::Cdc42 / elav-GAL4* (left), *UAS-Cdc42::eGFP / elav-GAL4* (right). (b) Label may adopt either a green color with eGFP (left), a red color with mCherry (middle) or a black (purple) with NirFP (right). Genotypes: *UAS-eGFP::Cdc42 / eve-GAL4* (left), *UAS-mCherry::Cdc42 / eve-GAL4* (middle), + / *eve-GAL4* ; *UAS-NirFP::Cdc42 / +* (right). Again, colors do not seem to impact the way proteins distribute within the animals. (c) Labeled proteins may be expressed either ubiquitously using *tub-GAL4* (left), pan-neuronally using *elav-GAL4* (middle) or cell specifically using *eve-GAL4* (right). Genotypes: *UAS-eGFP::Cdc42 / tub-GAL4* (left), *UAS-eGFP::Cdc42 / elav-GAL4* (middle), *UAS-eGFP::Cdc42 / eve-GAL4* (right). Dashed lines indicate the midline. Asterisks point to the cell bodies of the bilateral pair of aCC motoneurons in the abdominal segment 3. Scale bar 10 nm. [<156>](#) [<previous page>](#) [\[control / 12>>10\]](#)

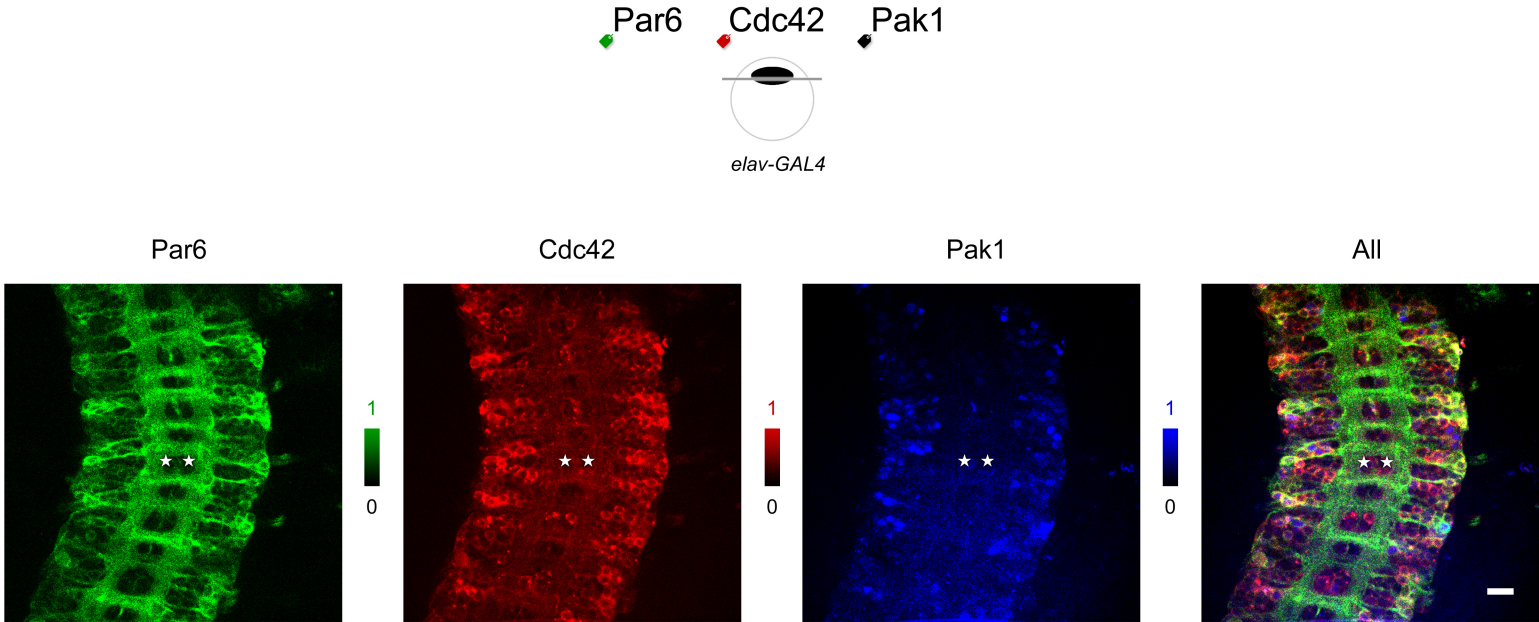

**Figure 5. Co-localization of A, B and C.** eGFP-labeled Par6 (green), mCherry-labeled Cdc42 (red), and NirFP-labeled Pak1 (blue *pixels*) are co-expressed in all neurons of a *Drosophila* embryo. Their expression patterns vary from pixel to pixel and from cell to cell. Anatomical features help identify a bilateral pair of aCC motoneurons (*asterisks*) in the abdominal segment A2. Genotype: *UAS-eGFP::Par6 UAS-mCherry::Cdc42 / elav-GAL4 ; UAS-NirFP::Pak1 / +*. Scale bar 20 nm. **<70> [trio\_new / 12>>10] black/purple: 0033ff**

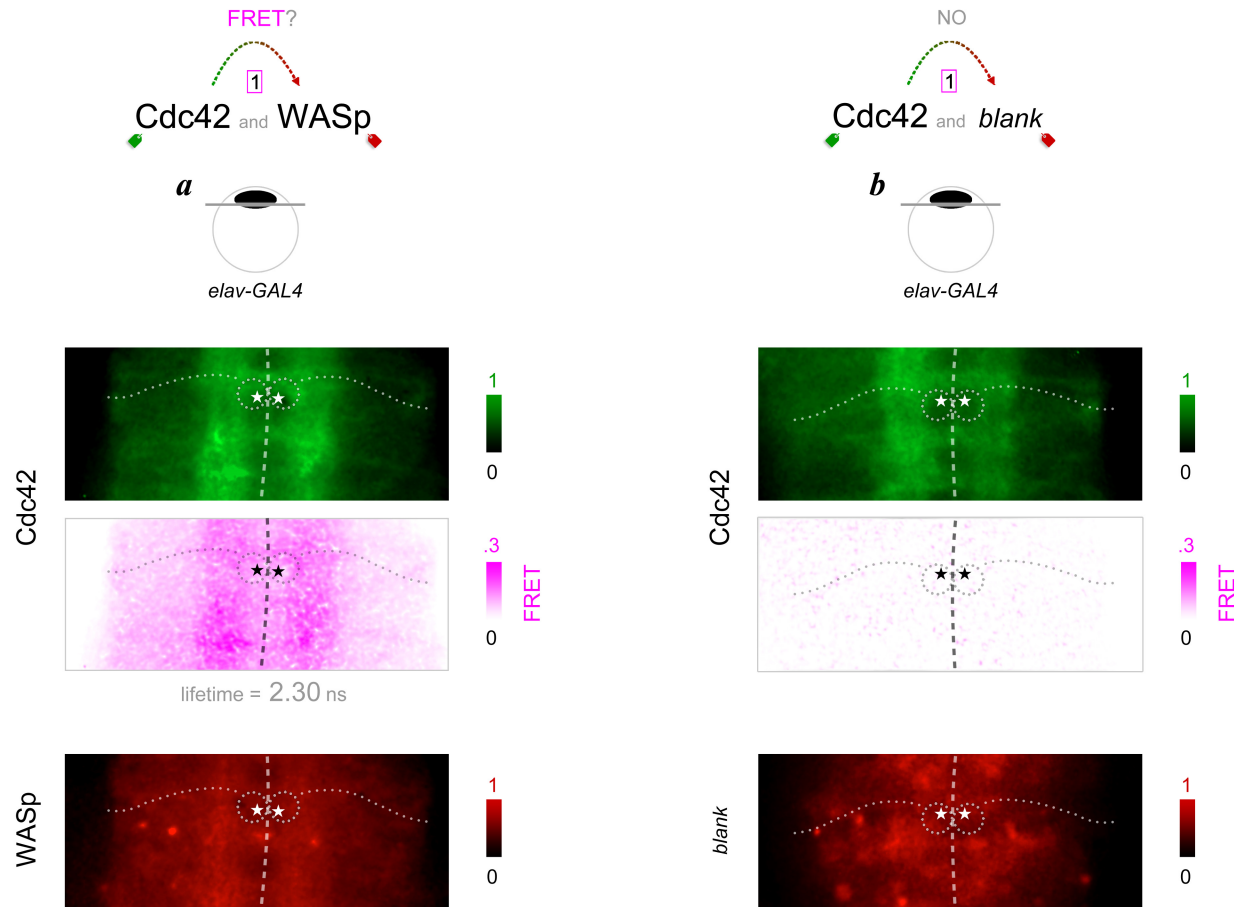

**Figure 6. Interaction between A and B.** (a) Interaction between monomeric G protein Cdc42 and its alleged partner WASp is revealed by FRET. Cdc42 is present at higher concentrations in neuropil region near the midline (dashed line) compared to cortical region (*top* panel). Probability of FRET between eGFP and mCherry that labels Cdc42 and WASp, respectively, is higher in the neuropil (*middle* panel). Estimated FRET probability of .24 here translates to about one in four eGFP-labeled Cdc42 proteins are within the FRET-able proximity to mCherry-labeled WASp proteins. *Asterisks* show where the bilateral pair of aCC motoneuron cell bodies are located. Their axons (dotted lines) extend laterally through first the neuropil region with higher FRET and then out into the cortical region with lower FRET. Distribution pattern of WASp, meanwhile, is distinct from Cdc42's (*bottom* panel). However, the expression patterns of Cdc42 and WASp as well as their co-expression do not correlate to the observed FRET pattern. (b) Control intended for no FRET detection. The mean eGFP fluorescence lifetime at the neuropil stays at 2.56 ns, indicating no FRET. Genotype: *UAS-eGFP::Cdc42 UAS-WASp::mCherry / elav-GAL4* in (a) and *UAS-eGFP::Cdc42 UAS-mCherry / elav-GAL4* in (b). <192> [intereaction\_new / 12>>10]

| Gene Symbol | Gene Name                                   | Transcript-ID  | CG      | FBgn_ID     |
|-------------|---------------------------------------------|----------------|---------|-------------|
| Act42A      | Actin 42A                                   | Act42A-RA      | CG12051 | FBgn0000043 |
| Act5C       | Actin 5C                                    | Act5C-RA       | CG4027  | FBgn0000042 |
| Actn        | alpha actinin                               | Actn-RA        | CG4376  | FBgn0000667 |
| AdenoK      | Adenosine Kinase                            | AdenoK-RA      | CG11255 | FBgn0036337 |
| ago         | archipelago                                 | ago-RA         | CG15010 | FBgn0041171 |
| Agpat1      | glycerol-3-phosphate O-acyltransf           | Agpat1-RA      | CG3812  | FBgn0030421 |
| ALiX        | ALG-2 interacting protein X                 | ALiX-RA        | CG12876 | FBgn0086346 |
| alph        | alphabet                                    | alph-RE        | CG1906  | FBgn0086361 |
| amon        | amontillado                                 | amon-RA        | CG6438  | FBgn0023179 |
| AnxB9       | Annexin B9                                  | AnxB9-RB       | CG5730  | FBgn0000083 |
| APC10       | phase Promoting Complex subuni              | APC10-RA       | CG11419 | FBgn0034231 |
| Aplip1      | $\gamma$ P-like protein interacting protein | Aplip1-RB      | CG1200  | FBgn0040281 |
| Aplip1      | $\gamma$ P-like protein interacting protein | Aplip1-RA      | CG1200  | FBgn0040281 |
| Appl        | eta amyloid protein precursor-lik           | Appl-RA        | CG7727  | FBgn0000108 |
| Arf51F      | ADP ribosylation factor at 51F              | Arf51F-RA      | CG8156  | FBgn0013750 |
| Arf79F      | ADP ribosylation factor at 79F              | Arf79F-RA      | CG8385  | FBgn0010348 |
| ArfGAP3     | ylation factor GTPase activating            | ArfGAP3-RA     | CG6838  | FBgn0037182 |
| Arp2        | Actin-related protein 2                     | Arp2-RA        | CG9901  | FBgn0011742 |
| Arp3        | Actin-related protein 3                     | Arp3-RA        | CG7558  | FBgn0262716 |
| Arpc2       | actin-related protein 2/3 complex, sub      | Arpc2-RA       | CG10954 | FBgn0032859 |
| Arpc3B      | actin-related protein 2/3 complex, sub      | Arpc3B-RA      | CG8936  | FBgn0065032 |
| Arpc5       | actin-related protein 2/3 complex, sub      | Arpc5-RA       | CG9881  | FBgn0031437 |
| Ate1        | Arginyltransferase 1                        | Ate1-RA        | CG9204  | FBgn0025720 |
| Ate1        | Arginyltransferase 1                        | Ate1-RB        | CG9204  | FBgn0025720 |
| Atg8a       | Autophagy-related 8a                        | Atg8a-RA       | CG32672 | FBgn0052672 |
| ATPsynB     | ATP synthase, subunit B                     | ATPsynB-RA     | CG8189  | FBgn0019644 |
| ATPsynbeta  | ATP synthase, beta subunit                  | ATPsynbeta-RA  | CG11154 | FBgn0010217 |
| ATPsyndelta | ATP synthase, delta subunit                 | ATPsyndelta-RA | CG2968  | FBgn0028342 |
| ATPsynG     | ATP synthase, subunit G                     | ATPsynG-RA     | CG6105  | FBgn0010612 |
| ATPsyngamma | ATP synthase, gamma subunit                 | ATPsyngamma-RA | CG7610  | FBgn0020235 |
| ATPsynO     | ase, oligomycin sensitivity conferr         | ATPsynO-RA     | CG4307  | FBgn0016691 |
| ball        | ballchen                                    | ball-RA        | CG6386  | FBgn0027889 |
| betaTub56D  | beta-Tubulin at 56D                         | betaTub56D-RB  | CG9277  | FBgn0284243 |
| betaTub85D  | beta-Tubulin at 85D                         | betaTub85D-RA  | CG9359  | FBgn0003889 |
| blw         | bellwether                                  | blw-RA         | CG3612  | FBgn0011211 |
| boi         | brother of ihog                             | boi-RA         | CG32796 | FBgn0040388 |
| bru1        | bruno 1                                     | bru1-RA        | CG31762 | FBgn0000114 |
| bs          | blistered                                   | bs-RA          | CG3411  | FBgn0004101 |

|           |                                    |              |         |             |
|-----------|------------------------------------|--------------|---------|-------------|
| bsk       | basket                             | bsk-RB       | CG5680  | FBgn0000229 |
| Btk29A    | Btk family kinase at 29A           | Btk29A-RB    | CG8049  | FBgn0003502 |
| Buffy     | Buffy                              | Buffy-RA     | CG8238  | FBgn0040491 |
| cact      | cactus                             | cact-RA      | CG5848  | FBgn0000250 |
| CanA1     | Calcineurin A1                     | CanA1-RA     | CG1455  | FBgn0010015 |
| CCT6      | aperonin containing TCP1 subuni    | CCT6-RA      | CG8231  | FBgn0027329 |
| Cdc23     | Cell division cycle 23             | Cdc23-RA     | CG2508  | FBgn0032863 |
| Cdc27     | Cell division cycle 27             | Cdc27-RA     | CG8610  | FBgn0012058 |
| Cdc42     | Cell division cycle 42             | Cdc42-RA     | CG12530 | FBgn0010341 |
| CDC45L    | CDC45L                             | CDC45L-RA    | CG3658  | FBgn0026143 |
| Cdk1      | Cyclin-dependent kinase 1          | Cdk1-RA      | CG5363  | FBgn0004106 |
| CG10077   | -                                  | CG10077-RA   | CG10077 | FBgn0035720 |
| CG10298   | -                                  | CG10298-RA   | CG10298 | FBgn0037432 |
| CG11583   | -                                  | CG11583-RA   | CG11583 | FBgn0035524 |
| CG11807   | -                                  | CG11807-RA   | CG11807 | FBgn0033996 |
| CG13887   | -                                  | CG13887-RB   | CG13887 | FBgn0035165 |
| CG17739   | -                                  | CG17739-RA   | CG17739 | FBgn0033710 |
| CG1909    | -                                  | CG1909-RA    | CG1909  | FBgn0039911 |
| CG2862    | -                                  | CG2862-RA    | CG2862  | FBgn0031459 |
| CG3008    | -                                  | CG3008-RA    | CG3008  | FBgn0031643 |
| CG31457   | -                                  | CG31457-RB   | CG31457 | FBgn0051457 |
| CG32137   | -                                  | CG32137-RB   | CG32137 | FBgn0052137 |
| CG3529    | -                                  | CG3529-RB    | CG3529  | FBgn0035995 |
| CG3788    | -                                  | CG3788-RA    | CG3788  | FBgn0034800 |
| CG42540   | -                                  | CG42540-RB   | CG42540 | FBgn0260657 |
| CG7220    | -                                  | CG7220-RA    | CG7220  | FBgn0033544 |
| CG8199    | -                                  | CG8199-RA    | CG8199  | FBgn0037709 |
| CG9281    | -                                  | CG9281-RB    | CG9281  | FBgn0030672 |
| Chc       | Clathrin heavy chain               | Chc-RC       | CG9012  | FBgn0000319 |
| cin       | cinnamon                           | cin-RA       | CG2945  | FBgn0000316 |
| Cka       | Connector of kinase to AP-1        | Cka-RA       | CG7392  | FBgn0044323 |
| CkIIBeta  | Casein kinase II beta subunit      | CkIIBeta-RB  | CG15224 | FBgn0000259 |
| Cortactin | Cortactin                          | Cortactin-RA | CG3637  | FBgn0025865 |
| COX4L     | cytochrome c oxidase subunit 4-lik | COX4L-RA     | CG10396 | FBgn0033020 |
| Crk       | Crk oncogene                       | Crk-RA       | CG1587  | FBgn0024811 |
| csul      | capsuleen                          | csul-RA      | CG3730  | FBgn0015925 |
| csw       | corkscrew                          | csw-RA       | CG3954  | FBgn0000382 |
| CtsB1     | Cathepsin B1                       | CtsB1-RA     | CG10992 | FBgn0030521 |
| CycA      | Cyclin A                           | CycA-RA      | CG5940  | FBgn0000404 |
| CycC      | Cyclin C                           | CycC-RA      | CG7281  | FBgn0004597 |
| CycD      | Cyclin D                           | CycD-RD      | CG9096  | FBgn0010315 |



|              |                                      |                  |         |             |
|--------------|--------------------------------------|------------------|---------|-------------|
| CycG         | Cyclin G                             | CycG-RA          | CG11525 | FBgn0039858 |
| Diap2        | th-associated inhibitor of apopto:   | Diap2-RA         | CG8293  | FBgn0015247 |
| dj-1 $\beta$ | #N/A                                 | dj-1 $\beta$ -RA | CG1349  | FBgn0039802 |
| dnr1         | defense repressor 1                  | dnr1-RA          | CG12489 | FBgn0260866 |
| dock         | dreadlocks                           | dock-RB          | CG3727  | FBgn0010583 |
| drk          | downstream of receptor kinase        | drk-RA           | CG6033  | FBgn0004638 |
| Dsor1        | Downstream of raf1                   | Dsor1-RA         | CG15793 | FBgn0010269 |
| Dsp1         | Dorsal switch protein 1              | Dsp1-RA          | CG12223 | FBgn0278608 |
| E(z)         | Enhancer of zeste                    | E(z)-RA          | CG6502  | FBgn0000629 |
| Eaat2        | xcitatory amino acid transporter     | Eaat2            | CG3159  | FBgn0026438 |
| eIF4B        | aryotic translation initiation facto | eIF4B-RA         | CG10837 | FBgn0020660 |
| eIF4E1       | ryotic translation initiation factor | eIF4E1-RC        | CG4035  | FBgn0015218 |
| Ent1         | uilibrative nucleoside transportei   | Ent1-RA          | CG11907 | FBgn0031250 |
| exd          | extradenticle                        | exd-RA           | CG8933  | FBgn0000611 |
| FeCH         | Ferrochelatase                       | FeCH-RC          | CG2098  | FBgn0266268 |
| FeCH         | Ferrochelatase                       | FeCH-RB          | CG2098  | FBgn0266268 |
| Flo1         | Flotillin 1                          | Flo1-RA          | CG8200  | FBgn0024754 |
| Flo2         | Flotillin 2                          | Flo2-RM          | CG32593 | FBgn0264078 |
| Flo2         | Flotillin 2                          | Flo2-RB          | CG32593 | FBgn0264078 |
| flw          | flapwing                             | flw-RA           | CG2096  | FBgn0000711 |
| Fnta         | Farnesyl transferase alpha           | Fnta-RA          | CG2976  | FBgn0031633 |
| fzr          | fizzy-related                        | rap-RA           | CG3000  | FBgn0262699 |
| Gad1         | Glutamic acid decarboxylase 1        | Gad1-RA          | CG14994 | FBgn0004516 |
| Galpai       | G protein alpha i subunit            | Galpai-RA        | CG10060 | FBgn0001104 |
| Galphao      | G protein alpha o subunit            | Galphao-RA       | CG2204  | FBgn0001122 |
| Galphas      | G protein alpha s subunit            | Galphas-RB       | CG2835  | FBgn0001123 |
| gammaCOP     | Coat Protein (coatomer) gamma        | gammaCOP-RB      | CG1528  | FBgn0028968 |
| Gbeta13F     | G protein beta-subunit 13F           | Gbeta13F-RA      | CG10545 | FBgn0001105 |
| Gbeta5       | Gbeta5                               | Gbeta5-RA        | CG10763 | FBgn0030011 |
| Gdi          | GDP dissociation inhibitor           | Gdi-RA           | CG4422  | FBgn0004868 |
| GMF          | Glia maturation factor               | GMF-RA           | CG5869  | FBgn0028894 |
| Gp93         | Glycoprotein 93                      | Gp93-RA          | CG5520  | FBgn0039562 |
| grn          | grain                                | grn-RA           | CG9656  | FBgn0001138 |
| gsb-n        | gooseberry-neuro                     | gsb-n-RA         | CG2692  | FBgn0001147 |
| gus          | gustavus                             | gus-RA           | CG2944  | FBgn0026238 |
| Gyg          | Glycogenin                           | Gyg-RB           | CG44244 | FBgn0265191 |
| h            | hairy                                | h-RA             | CG6494  | FBgn0001168 |
| HDAC1        | Histone deacetylase 1                | HDAC1-RA         | CG7471  | FBgn0015805 |
| HDAC3        | Histone deacetylase 3                | Hdac3-RA         | CG2128  | FBgn0025825 |
| HDAC6        | Histone deacetylase 6                | HDAC6-RA         | CG6170  | FBgn0026428 |
| Hex-C        | Hexokinase C                         | Hex-C-RA         | CG8094  | FBgn0001187 |

|              |                                         |                 |         |             |
|--------------|-----------------------------------------|-----------------|---------|-------------|
| Hmgs         | HMG Coenzyme A synthase                 | Hmgs-RA         | CG4311  | FBgn0010611 |
| Hnf4         | Hepatocyte nuclear factor 4             | Hnf4-RA         | CG9310  | FBgn0004914 |
| Hpd          | hydroxyphenylpyruvate dioxygenase       | Hpd-RB          | CG11796 | FBgn0036992 |
| Hpd          | hydroxyphenylpyruvate dioxygenase       | Hpd-RA          | CG11796 | FBgn0036992 |
| Hr96         | Hormone receptor-like in 96             | Hr96-RA         | CG11783 | FBgn0015240 |
| Hrb87F       | heterogeneous nuclear ribonucleoprotein | Hrb87F-RA       | CG12749 | FBgn0004237 |
| HtrA2        | HTRA2-related serine protease           | HtrA2-RA        | CG8464  | FBgn0038233 |
| I-2          | Inhibitor-2                             | I-2-RA          | CG10574 | FBgn0028429 |
| ICA69        | Islet cell autoantigen 69 kDa           | ICA69-RA        | CG10566 | FBgn0037050 |
| Ilk          | Integrin linked kinase                  | Ilk-RA          | CG10504 | FBgn0028427 |
| Imp          | IGF-II mRNA-binding protein             | Imp-RA          | CG1691  | FBgn0285926 |
| Jra          | Jun-related antigen                     | Jra-RA          | CG2275  | FBgn0001291 |
| Klp61F       | Kinesin-like protein at 61F             | Klp61F-RA       | CG9191  | FBgn0004378 |
| krz          | kurtz                                   | krz-RA          | CG1487  | FBgn0040206 |
| LamC         | Lamin C                                 | LamC-RA         | CG10119 | FBgn0010397 |
| lid          | little imaginal discs                   | lid-RA          | CG9088  | FBgn0031759 |
| Liprin-alpha | Liprin-alpha                            | Liprin-alpha-RA | CG11199 | FBgn0046704 |
| Lis-1        | Lissencephaly-1                         | Lis-1-RA        | CG8440  | FBgn0015754 |
| Lmpt         | Limpet                                  | Lmpt-RA         | CG42679 | FBgn0261565 |
| loqs         | loquacious                              | loqs-RB         | CG6866  | FBgn0032515 |
| Mad          | Mothers against dpp                     | Mad-RA          | CG12399 | FBgn0011648 |
| Mbs          | Myosin binding subunit                  | Mbs-RE          | CG32156 | FBgn0005536 |
| metro        | menage a trois                          | metro-RB        | CG30021 | FBgn0050021 |
| mew          | multiple edematous wings                | mew-RA          | CG1771  | FBgn0004456 |
| Mkk4         | MAP kinase kinase 4                     | Mkk4-RA         | CG9738  | FBgn0024326 |
| MRG15        | MORF-related gene 15                    | MRG15-RA        | CG6363  | FBgn0027378 |
| mRpL40       | mitochondrial ribosomal protein L4      | mRpL40-RA       | CG5242  | FBgn0037892 |
| mts          | microtubule star                        | mts-RA          | CG7109  | FBgn0004177 |
| mys          | mysospheroid                            | mys-RA          | CG1560  | FBgn0004657 |
| Nedd4        | Nedd4                                   | Nedd4-RK        | CG42279 | FBgn0259174 |
| Nf-YA        | Nuclear factor Y-box A                  | Nf-YA-RA        | CG3891  | FBgn0035993 |
| Nf-YC        | Nuclear factor Y-box C                  | Nf-YC-RA        | CG3075  | FBgn0029905 |
| Nmt          | N-myristoyl transferase                 | Nmt-RA          | CG7436  | FBgn0020392 |
| nSyb         | neuronal Synaptobrevin                  | nSyb-RA         | CG17248 | FBgn0013342 |
| nudE         | nudE                                    | nudE-RA         | CG8104  | FBgn0036059 |
| Oat          | ornithine aminotransferase precursor    | Oat-RA          | CG8782  | FBgn0022774 |
| Osbp         | Oxysterol binding protein               | Osbp-RA         | CG6708  | FBgn0020626 |
| p130CAS      | p130CAS                                 | p130CAS-RB      | CG1212  | FBgn0035101 |
| p38b         | p38b MAP kinase                         | p38b-RA         | CG7393  | FBgn0024846 |
| p53          | p53                                     | p53-RA          | CG33336 | FBgn0039044 |
| p53          | p53                                     | p53-RB          | CG33336 | FBgn0039044 |

|              |                                                         |                 |         |             |
|--------------|---------------------------------------------------------|-----------------|---------|-------------|
| Pak3         | Pak3                                                    | Pak3-RA         | CG14895 | FBgn0044826 |
| par-6        | par-6                                                   | par-6-RA        | CG5884  | FBgn0026192 |
| Parp         | Poly-(ADP-ribose) polymerase                            | Parp-RB         | CG40411 | FBgn0010247 |
| parvin       | parvin                                                  | parvin-RA       | CG32528 | FBgn0052528 |
| Pde1c        | Phosphodiesterase 1c                                    | Pde1c-RC        | CG44007 | FBgn0264815 |
| Pdk1         | Phosphoinositide-dependent kinase                       | Pdk1-RA         | CG1210  | FBgn0020386 |
| Pdp1         | PAR-domain protein 1                                    | Pdp1-RB         | CG17888 | FBgn0016694 |
| Pect         | phoethanolamine cytidyltransferase                      | Pect-RD         | CG5547  | FBgn0032482 |
| Pepck2       | phosphoenolpyruvate carboxylase                         | Pepck2-RA       | CG10924 | FBgn0034356 |
| Pex13        | Peroxin 13                                              | Pex13-RA        | CG4663  | FBgn0033812 |
| Pgm1         | Phosphoglucose mutase 1                                 | Pgm1-RA         | CG5165  | FBgn0003076 |
| PHGPx        | PHGPx                                                   | PHGPx-RC        | CG12013 | FBgn0035438 |
| PhKgamma     | Phosphorylase kinase gamma                              | PhKgamma-RB     | CG1830  | FBgn0011754 |
| Pi3K92E      | Pi3K92E                                                 | Pi3K92E-RA      | CG4141  | FBgn0015279 |
| PIG-A        | Phosphatidylinositol glycan anchor biosynthesis class A | PIG-A-RA        | CG6401  | FBgn0034270 |
| Pitslre      | Pitslre                                                 | Pitslre-RA      | CG4268  | FBgn0016696 |
| Pka-C1       | Protein kinase, cAMP-dependent, catalytic subunit       | Pka-C1-RB       | CG4379  | FBgn0000273 |
| Pka-R1       | Protein kinase, cAMP-dependent, regulatory subunit      | Pka-R1-RK       | CG42341 | FBgn0259243 |
| Pka-R2       | Protein kinase, cAMP-dependent, regulatory subunit      | Pka-R2-RA       | CG15862 | FBgn0022382 |
| Pkg21D       | Protein kinase, cGMP-dependent at 21D                   | Pkg21D-RA       | CG3324  | FBgn0000442 |
| Pnn          | Pinin                                                   | Pnn-RA          | CG8383  | FBgn0037737 |
| Pp1-13C      | Protein phosphatase 1 at 13C                            | Pp1-13C-RA      | CG9156  | FBgn0003132 |
| Pp1alpha-96A | Protein phosphatase 1alpha at 96A                       | Pp1alpha-96A-RA | CG6593  | FBgn0003134 |
| Pp4-19C      | Protein phosphatase 19C                                 | Pp4-19C-RA      | CG32505 | FBgn0023177 |
| prd          | paired                                                  | prd-RA          | CG6716  | FBgn0003145 |
| primo-2      | primo-2                                                 | primo-2-RB      | CG33747 | FBgn0040076 |
| Psn          | Presenilin                                              | Psn-RA          | CG18803 | FBgn0284421 |
| PSR          | phosphatidylserine receptor                             | PSR-RA          | CG5383  | FBgn0038948 |
| Ptp61F       | Protein tyrosine phosphatase 61F                        | Ptp61F-RC       | CG9181  | FBgn0267487 |
| Pu           | Punch                                                   | Pu-RA           | CG9441  | FBgn0003162 |
| Rab10        | Rab10                                                   | Rab10-RA        | CG17060 | FBgn0015789 |
| Rab11        | Rab11                                                   | Rab11-RA        | CG5771  | FBgn0015790 |
| Rab18        | Rab18                                                   | Rab18-RA        | CG3129  | FBgn0015794 |
| Rab2         | Rab2                                                    | Rab2-RA         | CG3269  | FBgn0014009 |
| Rab21        | Rab21                                                   | Rab21-RA        | CG17515 | FBgn0039966 |
| Rab23        | Rab23                                                   | Rab23-RA        | CG2108  | FBgn0037364 |
| Rab3         | Rab3                                                    | Rab3-RA         | CG7576  | FBgn0005586 |
| Rab30        | Rab30                                                   | Rab30-RA        | CG9100  | FBgn0031882 |
| Rab32        | Rab32                                                   | Rab32-RC        | CG8024  | FBgn0002567 |
| Rab35        | Rab35                                                   | Rab35-RA        | CG9575  | FBgn0031090 |
| Rab5         | Rab5                                                    | Rab5-RA         | CG3664  | FBgn0014010 |

|          |                                      |             |         |             |
|----------|--------------------------------------|-------------|---------|-------------|
| Rab6     | Rab6                                 | Rab6-RA     | CG6601  | FBgn0015797 |
| Rab7     | Rab7                                 | Rab7-RA     | CG5915  | FBgn0015795 |
| Rab8     | Rab8                                 | Rab8-RA     | CG8287  | FBgn0262518 |
| Rab9     | Rab9                                 | Rab9-RA     | CG9994  | FBgn0032782 |
| Rab9Fb   | Rab at 9Fb                           | Rab9Fb-RA   | CG32670 | FBgn0052670 |
| RabX1    | RabX1                                | RabX1-RA    | CG3870  | FBgn0015372 |
| RabX6    | RabX6                                | RabX6-RA    | CG12015 | FBgn0035155 |
| Rac1     | Rac1                                 | Rac1-RA     | CG2248  | FBgn0010333 |
| Rac2     | Rac2                                 | Rac2-RA     | CG8556  | FBgn0014011 |
| Rack1    | receptor of activated protein kinase | Rack1-RA    | CG7111  | FBgn0020618 |
| Raf      | Raf oncogene                         | Raf-RA      | CG2845  | FBgn0003079 |
| Rala     | Ras-like protein A                   | Rala-RA     | CG2849  | FBgn0015286 |
| Ran      | Ran                                  | Ran-RA      | CG1404  | FBgn0020255 |
| Rap1     | Rap1 GTPase                          | Rap1-RA     | CG1956  | FBgn0004636 |
| Rap2l    | Ras-associated protein 2-like        | Rap2l-RA    | CG3204  | FBgn0283666 |
| ras      | raspberry                            | ras-RB      | CG1799  | FBgn0003204 |
| Ras64B   | Ras oncogene at 64B                  | Ras64B-RA   | CG1167  | FBgn0003206 |
| Rel      | Relish                               | Rel-RA      | CG11992 | FBgn0014018 |
| Rho1     | Rho1                                 | Rho1-RA     | CG8416  | FBgn0014020 |
| RhoGAP5A | rho GTPase activating protein at 5   | RhoGAP5A-RB | CG3208  | FBgn0029778 |
| RhoGDI   | RhoGDI                               | RhoGDI-RA   | CG7823  | FBgn0036921 |
| RnrS     | ribose diphosphate reductase sm:     | RnrS-RA     | CG8975  | FBgn0011704 |
| RpL10    | Ribosomal protein L10                | RpL10-RC    | CG17521 | FBgn0024733 |
| RpL13A   | Ribosomal protein L13A               | RpL13A-RB   | CG1475  | FBgn0037351 |
| RpL40    | Ribosomal protein L40                | RpL40-RA    | CG2960  | FBgn0003941 |
| RpS6     | Ribosomal protein S6                 | RpS6-RA     | CG10944 | FBgn0261592 |
| rush     | rush hour                            | rush-RA     | CG14782 | FBgn0025381 |
| Sam-S    | S-adenosylmethionine Synthetase      | Sam-S-RA    | CG2674  | FBgn0005278 |
| scrambl1 | scramblase 1                         | scrambl1-RA | CG32056 | FBgn0052056 |
| sgg      | shaggy                               | sgg-RB      | CG2621  | FBgn0003371 |
| sgl      | sugarless                            | sgl-RA      | CG10072 | FBgn0261445 |
| shtd     | shattered                            | shtd        | CCG9198 | FBgn0004391 |
| sina     | seven in absentia                    | sina-RA     | CG9949  | FBgn0003410 |
| Sk1      | Sphingosine kinase 1                 | Sk1-RA      | CG1747  | FBgn0030300 |
| Skp2     | -phase kinase-associated protein     | Skp2        | CG9772  | FBgn0037236 |
| SkpB     | SKP1-related B                       | SkpB-RA     | CG8881  | FBgn0026176 |
| slmb     | supernumerary limbs                  | slmb-RA     | CG3412  | FBgn0283468 |
| Smox     | Smad on X                            | Smox-RA     | CG2262  | FBgn0025800 |
| sn       | singed                               | sn-RA       | CG32858 | FBgn0003447 |
| Sod2     | Superoxide dismutase 2 (Mn)          | Sod2-RA     | CG8905  | FBgn0010213 |
| Spps     | se factor for pairing sensitive-sile | Spps-RA     | CG5669  | FBgn0039169 |

|             |                                     |                |         |             |
|-------------|-------------------------------------|----------------|---------|-------------|
| Sptr        | Sepiapterin reductase               | Sptr-RA        | CG12117 | FBgn0014032 |
| sqa         | spaghetti-squash activator          | sqa-RB         | CG42347 | FBgn0259678 |
| sqh         | spaghetti squash                    | sqh-RA         | CG3595  | FBgn0003514 |
| Src64B      | Src oncogene at 64B                 | Src64B-RC      | CG7524  | FBgn0262733 |
| SREBP       | ol regulatory element binding prc   | SREBP-RA       | CG8522  | FBgn0261283 |
| STUB1       | omology and U-box containing pr     | STUB1-RA       | CG5203  | FBgn0027052 |
| Su(var)2-10 | Suppressor of variegation 2-10      | Su(var)2-10-RD | CG8068  | FBgn0003612 |
| Su(var)2-10 | Suppressor of variegation 2-10      | Su(var)2-10-RF | CG8068  | FBgn0003612 |
| Su(var)3-3  | Suppressor of variegation 3-3       | Su(var)3-3-RA  | CG17149 | FBgn0260397 |
| Su(z)12     | Su(z)12                             | Su(z)12-RA     | CG8013  | FBgn0020887 |
| Swip-1      | Swiprosin-1                         | Swip-1-RA      | CG10641 | FBgn0032731 |
| Syb         | Synaptobrevin                       | Syb-RA         | CG12210 | FBgn0003660 |
| Synd        | Syndapin                            | Synd-RB        | CG33094 | FBgn0053094 |
| Syx1A       | Syntaxin 1A                         | Syx1A-RA       | CG31136 | FBgn0013343 |
| Tace        | Tace                                | Tace-RA        | CG7908  | FBgn0039734 |
| Tak1        | TGF- $\beta$ activated kinase 1     | Tak1-RA        | CG18492 | FBgn0026323 |
| Tango4      | Transport and Golgi organization 4  | Tango4-RA      | CG1796  | FBgn0030365 |
| Taz         | Tafazzin                            | Taz-RA         | CG8766  | FBgn0026619 |
| TBCB        | tubulin-binding cofactor B          | TBCB-RA        | CG11242 | FBgn0034451 |
| Tbp         | TATA binding protein                | Tbp-RA         | CG9874  | FBgn0003687 |
| Tcs3        | Tcs3                                | Tcs3-RA        | CG4933  | FBgn0283681 |
| TfAP-2      | Transcription factor AP-2           | TfAP-2-RB      | CG7807  | FBgn0261953 |
| Tfb1        | Transcription factor B1             | Tfb1-RA        | CG8151  | FBgn0033929 |
| Tg          | Transglutaminase                    | Tg-RA          | CG7356  | FBgn0031975 |
| Tip60       | Tat interactive protein 60kDa       | Tip60-RA       | CG6121  | FBgn0026080 |
| tmod        | tropomodulin                        | tmod-RB        | CG1539  | FBgn0082582 |
| Traf4       | TNF-receptor-associated factor 4    | Traf4-RA       | CG3048  | FBgn0026319 |
| Traf6       | TNF-receptor-associated factor 6    | Traf6-RA       | CG10961 | FBgn0265464 |
| Tsc1        | Tsc1                                | Tsc1-RA        | CG6147  | FBgn0026317 |
| Tsp66E      | Tetraspanin 66E                     | Tsp66E-RA      | CG4999  | FBgn0035936 |
| Tsp96F      | Tetraspanin 96F                     | Tsp96F-RA      | CG6120  | FBgn0027865 |
| Ubc10       | Ubiquitin conjugating enzyme 10     | Ubc10-RA       | CG5788  | FBgn0026316 |
| Ube3a       | Ubiquitin protein ligase E3A        | Ube3a-RA       | CG6190  | FBgn0061469 |
| Ufd1-like   | Ubiquitin fusion-degradation 1-like | Ufd1-like-RA   | CG6233  | FBgn0036136 |
| Uros1       | Uroporphyrinogen III synthase 1     | CG1885-RA      | CG1885  | FBgn0030066 |
| usp         | ultraspiracle                       | usp-RA         | CG4380  | FBgn0003964 |
| Vav         | Van guanine nucleotide exchange fac | Vav-RA         | CG7893  | FBgn0040068 |
| Vinc        | Vinculin                            | Vinc-RA        | CG3299  | FBgn0004397 |
| Vps28       | Vacuolar protein sorting 28         | Vps28-RA       | CG12770 | FBgn0021814 |
| WASp        | WASp                                | WASp-RA        | CG1520  | FBgn0024273 |
| wbl         | windbeutel                          | wbl-RA         | CG7225  | FBgn0004003 |

|       |                                 |          |        |             |
|-------|---------------------------------|----------|--------|-------------|
| Wdfy2 | repeat and FYVE domain containi | Wdfy2-RA | CG5168 | FBgn0032246 |
| Wwox  | V domain containing oxidoreduct | Wwox-RA  | CG7221 | FBgn0031972 |
| zda   | zonda                           | zda-RA   | CG5482 | FBgn0034368 |

\*peptide no longer matches FlyBase annotation

| CDS size | Gold Source Clone | Accession number | Donor clone stop (DS) | DS               | GFP::ORF | RFP::ORF |
|----------|-------------------|------------------|-----------------------|------------------|----------|----------|
|          |                   |                  |                       | Accession number |          |          |
| 1128     | LD18090           | AY118907         | BS15418               | KX801817         | UGS01407 | URS01407 |
| 1128     | RE02927           | AY089562         | BS11334               | FJ636827         | UGS01271 | URS01271 |
| 2685     | LD37956           | AY069615         | ND                    | ~                |          |          |
| 1035     | GH14845           | AY060709         | BS09556               | FJ638826         | UGS01220 | URS01220 |
| 3978     | LD21322           | AY061300         | BS11048               | KX802002         | UGS01492 | URS01492 |
| 1029     | LD44987           | AY118588         | BS08872               | MN238604         | UGS01215 |          |
| 2508     | LD25543           | AY069534         | ND                    | ~                |          |          |
| 1122     | LD23542           | AY051685         | BS06802               | FJ635621         | UGS01372 | URS01372 |
| 1962     | GH12584           | AY119509         | ND                    | ~                |          |          |
| 972      | LD09947           | AY118504         | BS04048               | FJ634842         | UGS01331 | URS01331 |
| 585      | RE25242           | AY071207         | BS11859               | FJ636999         | UGS01487 | URS01487 |
| 1470     | GH14842           | AY051495         | BS07363               | FJ635831         | UGS01385 | URS01385 |
| 1449     | RH26053           | BT001795         | BS15971               | FJ638001         | UGS01415 |          |
| 2661     | GH04413           | AF181628         | ND                    | ~                |          |          |
| 525      | RE16882           | AY071116         | ND                    | ~                |          |          |
| 546      | LD24904           | AY060375         | BS05649               | FJ635191         | UGS01351 | URS01351 |
| 1656     | LD46935           | AY069700         | BS10163               | KX804690         | UGS01257 | URS01257 |
| 1182     | LD18955           | AY061256         | BS04230               | FJ634886         | UGS01357 | URS01357 |
| 1254     | LD35711           | AY051859         | BS08482               | FJ638812         | UGS01204 | URS01204 |
| 903      | LD29815           | AY060391         | BS08078               | FJ636093         | UGS01202 | URS01202 |
| 522      | SD24339           | AY119268         | BS15269               | FJ637907         | UGS01472 | URS01472 |
| 453      | RH48239           | AY089678         | BS13858               | FJ637540         | UGS01256 | URS01256 |
| 1431     | LD23642           | AY051688         | BS17605               | KX800222         | UGS01423 | URS01423 |
| 1452     | LD33682           | BT001498         | BS17738               | KX800750         | UGS01435 | URS01435 |
| 363      | LD05816           | AY122152         | BS03649               | FJ638771         | UGS01328 | URS01328 |
| 729      | RE36486           | BT011453         | BS16081               | FJ638055         | UGS01478 | URS01478 |
| 1515     | RE10864           | AY118367         | BS11538               | FJ636899         | UGS01430 | URS01430 |
| 471      | RE24457           | AY071203         | BS11948               | FJ637029         | UGS01463 | URS01463 |
| 297      | RE20862           | AY071165         | BS11796               | FJ636975         | UGS01279 | URS01279 |
| 891      | RE35715           | AY113454         | BS12071               | FJ637060         | UGS01282 | URS01282 |
| 627      | GH01760           | AY058261         | BS06972               | FJ635679         | UGS01378 | URS01378 |
| 1797     | LD09009           | AF160917         | BS03617               | FJ634726         | UGS01237 | URS01237 |
| 1341     | LD43681           | BT003242         | BS15123               | KX806269         | UGS01406 | URS01406 |
| 1338     | GH02051           | AY118725         | BS14906               | FJ637829         | UGS01404 |          |
| 1656     | HL08087           | BT003592         | BS10401               | FJ636639         | UGS01228 | URS01228 |
| 1641     | RE01910           | AY094843         | BS11320               | FJ636821         | UGS01269 | URS01269 |
| 1812     | LD29068           | AY051758         | BS08061               | FJ636084         | UGS01247 | URS01247 |
| 1347     | RE17834           | AY095071         | BS11757               | FJ636960         | UGS01315 | URS01315 |

|      |         |            |         |          |          |          |
|------|---------|------------|---------|----------|----------|----------|
| 1116 | HL02677 | AY070865   | BS04602 | FJ634972 | UGS01339 | URS01339 |
| 2358 | LD16208 | AY128441   | BS05076 | KX795404 |          | URS01443 |
| 897  | AT16536 | AY075219   | BS14274 | FJ637627 | UGS01295 | URS01295 |
| 1500 | LD10168 | AY069399   | BS01549 | FJ634644 | UGS01317 | URS01317 |
| 1866 | RE54552 | AY128480   | BS12368 | KX805643 | UGS01468 | URS01468 |
| 1599 | GH13725 | AY051470   | BS07223 | FJ635773 | UGS01242 | URS01242 |
| 2034 | LD09850 | BT010078   | BS05017 | KX794414 |          | URS01442 |
| 2700 | LD12661 | BT021947   | BS15481 | KX801947 | UGS01473 | URS01473 |
| 573  | HL08128 | AY119570   | BS03306 | FJ634713 |          |          |
| 1725 | LD35753 | AY051861   | BS08484 | FJ636179 | UGS01251 | URS01251 |
| 891  | LD38718 | AY061450   | BS06587 | FJ635552 | UGS01365 | URS01365 |
| 2454 | GH10652 | AY102660   | ND      | ~        |          |          |
| 561  | GH28351 | AY113352   | BS14872 | FJ637815 | UGS01471 | URS01471 |
| 1068 | LD22010 | AY118916   | BS05610 | FJ635161 | UGS01350 | URS01350 |
| 1473 | SD03973 | AY052088   | BS09340 | FJ636400 | UGS01219 | URS01219 |
| 684  | LP10861 | AY069750   | BS06288 | FJ635432 | UGS01360 | URS01360 |
| 2619 | GH02025 | AY058267   | BS07277 | FJ635800 | UGS01243 | URS01243 |
| 1818 | GH22690 | AY051576   | BS07690 | FJ635951 | UGS01246 | URS01246 |
| 450  | RH49748 | AY071745   | BS13964 | FJ637568 | UGS01292 | URS01292 |
| 1809 | RE33807 | AY071312   | BS12053 | KX804479 | UGS01464 |          |
| 1011 | LD10183 | AY069400   | BS04050 | FJ634844 | UGS01332 | URS01332 |
| 1860 | RE18568 | AY095527   | BS11775 | KX805359 | UGS01462 | URS01462 |
| 1629 | GH05942 | AY058297   | BS07113 | FJ635733 | UGS01382 | URS01382 |
| 1134 | AT31332 | AY075301   | BS12731 | FJ637281 | UGS01401 | URS01401 |
| 1194 | RE02540 | BT021331   | BS16738 | FJ638186 | UGS01434 | URS01434 |
| 462  | AT19555 | AY070806   | BS12785 | FJ637292 | UGS01403 | URS01403 |
| 1317 | GH19141 | AY051542   | BS07744 | MN238600 | UGS01388 | URS01388 |
| 1833 | LD02975 | AY061059   | BS03015 | FJ634690 | UGS01239 | URS01239 |
| 5034 | LD43101 | AY119615   | BS11028 | KX802159 | UGS01486 | URS01486 |
| 1803 | GH09380 | AY069078.1 | ND      | ~        |          |          |
| 2190 | LD41760 | AY061460   | ND      | ~        |          |          |
| 645  | RE31047 | AY113447   | BS12026 | FJ637039 | UGS01281 | URS01281 |
| 1677 | LD29964 | AY051774   | BS08083 | MN238597 | UGS01248 | URS01248 |
| 528  | AT07685 | AY084105   | BS13760 | FJ637521 | UGS01293 | URS01293 |
| 813  | RE60886 | BT012456   | BS16314 | FJ638116 |          | URS01418 |
| 1830 | LD07634 | AY122153   | BS15459 | KX803675 | UGS01408 | URS01408 |
| 2523 | LD22829 | BT001484   | BS03210 | FJ634694 | UGS01235 | URS01235 |
| 1020 | GH06546 | AY060640   | BS07022 | FJ635692 | UGS01383 | URS01383 |
| 1473 | LD44443 | AY058712   | BS08955 | FJ636323 | UGS01212 | URS01212 |
| 801  | LD35705 | AY061425   | BS06196 | FJ635392 | UGS01358 | URS01358 |
| 1431 | LD22957 | AY069509   | BS06692 | FJ635590 |          | URS01371 |



|      |          |          |         |          |          |          |
|------|----------|----------|---------|----------|----------|----------|
| 1698 | LD46284  | AY058720 | BS10622 | FJ636696 |          | URS01429 |
| 1494 | LD34777  | AY051844 | BS08565 | FJ636199 |          | URS01203 |
| 564  | GH09983  | AY060670 | BS06523 | FJ635531 | UGS01362 |          |
| 2028 | LD18186  | AY095032 | BS04649 | KX794325 |          | URS01441 |
| 1644 | LD42588  | AY119614 | BS08921 | FJ636318 | UGS01209 | URS01209 |
| 633  | LD12029  | AY061142 | BS02810 | FJ634676 | UGS01238 | URS01238 |
| 1188 | LD41207  | AY058692 | BS08685 | FJ636235 | UGS01252 |          |
| 1155 | GM02110  | AY060841 | BS04728 | FJ635017 | UGS01341 | URS01341 |
| 2280 | LD30505  | AY051785 | BS01296 | FJ634590 | UGS01322 | URS01322 |
| 1116 | GH09856* | AY069083 | BS16823 | KX805932 | UGS01421 | URS01421 |
| 1170 | RE54950  | AY071474 | BS12277 | FJ637130 | UGS01326 | URS01326 |
| 744  | RE36735  | BT012467 | BS16311 | FJ638114 | UGS01417 | URS01417 |
| 1428 | LD19162  | AY061261 | BS04234 | FJ634887 | UGS01333 | URS01333 |
| 1128 | LD03509  | AY061065 | BS03889 | FJ634814 | UGS01305 | URS01305 |
| 843  | GH01314  | AY058251 | BS06964 | FJ635675 | UGS01377 | URS01377 |
| 678  | SD11336  | BT001878 | BS17974 | KX803751 | UGS01426 | URS01426 |
| 1278 | SD10657  | AY058794 | BS09502 | FJ636432 |          | URS01447 |
| 1068 | LP11503  | AY069755 | BS09979 | FJ636515 | UGS01223 | URS01223 |
| 1275 | RE74011  | BT009962 | BS16376 | MN238598 |          | URS01431 |
| 1383 | GH05039  | AY069047 | BS07406 | FJ635845 |          | URS01494 |
| 993  | LD26412  | AY118534 | BS06620 | MN238602 | UGS01366 | URS01366 |
| 1434 | GH07620  | BT001403 | BS15605 | KX802445 | UGS01411 | URS01411 |
| 1530 | HL02049  | AY089526 | BS05072 | FJ635055 | UGS01344 | URS01344 |
| 1065 | LD22201  | AY051670 | BS06675 | FJ635585 | UGS01370 | URS01370 |
| 1062 | GM01620  | AY121631 | BS04626 | MN238599 |          | URS01340 |
| 1155 | LD26182  | AY058572 | BS10509 | FJ636687 |          | URS01229 |
| 2649 | RE37840  | BT001628 | BS14096 | KX800981 | UGS01233 | URS01233 |
| 1020 | LD25526  | AY058566 | BS08015 | FJ636059 | UGS01394 |          |
| 1074 | RH17413  | BT004841 | BS13476 | FJ638854 | UGS01289 | URS01289 |
| 1329 | LP03430  | BT003563 | ND      | ~        |          |          |
| 414  | RE40543  | BT014645 | BS16196 | KX803490 | UGS01477 | URS01477 |
| 2361 | LD23641  | AY075384 | BS10205 | FJ636594 | UGS01485 | URS01485 |
| 1458 | RE40104  | AY071369 | BS01543 | FJ634641 | UGS01309 | URS01309 |
| 1347 | RE64348  | AY071593 | BS01528 | FJ634634 | UGS01321 | URS01321 |
| 837  | LD34464  | AY119609 | BS10149 | FJ636575 | UGS01224 | URS01224 |
| 999  | RE02181  | AY121654 | BS11324 | FJ636822 | UGS01270 | URS01270 |
| 1011 | RE40955  | AY119633 | BS01472 | FJ634621 | UGS01303 | URS01303 |
| 1563 | GM14158  | AY058487 | BS06640 | FJ635573 | UGS01368 | URS01368 |
| 1314 | LD23745  | AY061321 | BS06812 | FJ635628 | UGS01373 | URS01373 |
| 3384 | LD43531  | BT004866 | BS10704 | KX801354 | UGS01455 | URS01455 |
| 1362 | RH33703  | AY071719 | BS13820 | KX802974 | UGS01291 | URS01291 |

|      |         |          |         |          |          |          |
|------|---------|----------|---------|----------|----------|----------|
| 1395 | LD26976 | AY051743 | BS08035 | FJ636068 | UGS01201 | URS01201 |
| 2112 | RE09535 | BT003533 | BS01601 | FJ634654 |          | URS01311 |
| 882  | GH03058 | AY047523 | BS07387 | FJ635837 | UGS01386 | URS01386 |
| 1140 | GH11957 | BT012317 | BS16504 | FJ638153 | UGS01419 | URS01419 |
| 2169 | GH14435 | AY051486 | BS01285 | FJ634586 | UGS01319 | URS01319 |
| 1155 | LD32727 | BT012315 | BS16432 | FJ638145 | UGS01420 | URS01420 |
| 1266 | AT14262 | AY075206 | BS14251 | KX805345 | UGS01294 | URS01294 |
| 615  | LD47783 | BT014655 | BS16517 | FJ638156 | UGS01493 | URS01493 |
| 1233 | GH23156 | AY051584 | BS07804 | FJ635992 | UGS01389 | URS01389 |
| 1344 | LD24671 | AY051708 | BS06840 | FJ635639 | UGS01375 | URS01375 |
| 1698 | SD07045 | AY069821 | ND      | ~        |          |          |
| 867  | LD25202 | AY058562 | BS01052 | FJ634511 | UGS01302 | URS01302 |
| 3198 | LD15641 | AY069442 | BS04093 | KX794262 | UGS01440 | URS01440 |
| 1410 | LD31082 | AY118946 | BS03268 | FJ634709 | UGS01439 | URS01439 |
| 1863 | LD31805 | AY095046 | BS08414 | FJ636146 | UGS01250 | URS01250 |
| 5514 | LD40310 | AY095051 | ND      | ~        |          |          |
| 3603 | LD33094 | BT004484 | ND      | ~        |          |          |
| 1233 | LD11219 | BT021404 | BS15473 | KX800932 | UGS01409 | URS01409 |
| 735  | RE22626 | AY128470 | BS16687 | FJ638182 | UGS01482 | URS01482 |
| 1395 | RE14437 | AY071070 | BS11495 | FJ636889 | UGS01275 | URS01275 |
| 1365 | RE72705 | BT004845 | BS01529 | FJ634635 | UGS01316 | URS01316 |
| 1131 | GH16214 | AY051508 | BS07493 | FJ635888 | UGS01445 | URS01445 |
| 1668 | GH12103 | BT003617 | BS09540 | FJ636440 | UGS01448 | URS01448 |
| 3147 | GH14509 | AY075338 | BS10262 | FJ636620 | UGS01258 | URS01258 |
| 1272 | RE70055 | AY070600 | BS02838 | FJ634684 | UGS01232 | URS01232 |
| 1272 | LD22902 | AY051679 | BS07991 | FJ636052 | UGS01393 | URS01393 |
| 588  | RE65766 | AY071609 | BS13216 | FJ637392 | UGS01287 | URS01287 |
| 927  | LD26077 | AY058571 | BS08023 | FJ636063 | UGS01396 | URS01396 |
| 2538 | RE55238 | AY113499 | BS13064 | KX806112 | UGS01488 | URS01488 |
| 2502 | SD04682 | AY061595 | ND      | ~        |          |          |
| 1197 | LD21748 | AY118913 | BS01111 | FJ634532 |          | URS01307 |
| 1803 | RE43755 | BT001649 | BS01577 | MN238603 | UGS01310 | URS01310 |
| 1416 | GM13220 | AF132556 | BS05308 | FJ635094 |          | URS01345 |
| 549  | GH04664 | AY069045 | BS05672 | FJ635210 |          | URS01354 |
| 951  | LD19982 | AY061280 | BS04240 | FJ634892 | UGS01334 | URS01334 |
| 1293 | GH01984 | AY047517 | BS06883 | FJ635656 | UGS01379 | URS01379 |
| 2352 | LD31802 | AY129448 | ND      | ~        |          |          |
| 1704 | GH02705 | AY058273 | BS07383 | FJ635836 | UGS01244 | URS01244 |
| 1095 | LD24658 | AY058548 | BS03211 | FJ634695 | UGS01241 | URS01241 |
| 1155 | GH11591 | AY069096 | BS01103 | FJ634528 | UGS01306 | URS01306 |
| 1485 | AT28346 | BT001357 | BS12663 | FJ637258 | UGS01402 | URS01402 |

|      |         |          |         |          |          |          |
|------|---------|----------|---------|----------|----------|----------|
| 1707 | LD10376 | BT003278 | BS15422 | KX805222 | UGS01489 |          |
| 1053 | LD29223 | AY061369 | BS10184 | FJ636586 | UGS01227 | URS01227 |
| 2982 | RE04933 | BT015238 | BS16644 | KX800772 | UGS01481 | URS01481 |
| 1101 | GH23568 | BT016127 | BS16867 | FJ638204 | UGS01422 | URS01422 |
| 1815 | RE56844 | AY118396 | ND      | ~        |          |          |
| 2265 | LD22131 | BT004489 | ND      | ~        |          |          |
| 810  | GM02880 | BT003290 | ND      | ~        |          |          |
| 1143 | RE62261 | BT003190 | BS15893 | KX803964 | UGS01416 | URS01416 |
| 1914 | RE12569 | AY094852 | BS11463 | KX803442 | UGS01460 | URS01460 |
| 1320 | RE69884 | BT001726 | BS15848 | KX801458 | UGS01414 | URS01414 |
| 1680 | LD36183 | BT010043 | BS10152 | KX803110 | UGS01225 | URS01225 |
| 594  | SD18370 | BT011331 | BS15670 | KX805987 | UGS01412 | URS01412 |
| 1257 | GH28523 | AY051635 | BS07875 | FJ636017 | UGS01392 | URS01392 |
| 3264 | SD05105 | BT003173 | ND      | ~        |          |          |
| 1437 | LD44262 | AY122191 | BS08852 | FJ636299 | UGS01211 | URS01211 |
| 2856 | LD39519 | BT016092 | BS17648 | KX802158 | UGS01436 | URS01436 |
| 1059 | LD13640 | AY069425 | BS04669 | FJ634999 | UGS01342 | URS01342 |
| 1128 | LD43873 | AY058709 | BS08844 | FJ636295 |          | URS01210 |
| 1131 | LD44591 | AY069669 | BS10160 | FJ636578 |          | URS01484 |
| 2304 | GH03852 | AY058288 | BS07293 | FJ635807 | UGS01245 | URS01245 |
| 909  | RE29832 | AY071261 | BS12114 | FJ637073 |          | URS01280 |
| 906  | GH10637 | AY060272 | BS07539 | FJ635898 | UGS01387 | URS01387 |
| 981  | LD14639 | BT016110 | BS15495 | KX804433 | UGS01410 | URS01410 |
| 921  | RE58406 | AY113503 | BS12834 | FJ637310 | UGS01286 | URS01286 |
| 1770 | GH22686 | AY059447 | BS01815 | FJ634662 |          | URS01320 |
| 492  | AT28881 | AY089477 | BS12705 | FJ637275 | UGS01296 | URS01296 |
| 1623 | LD23505 | AY061316 | BS17604 | KX805486 | UGS01483 | URS01483 |
| 1224 | LD25827 | AY051727 | BS08117 | FJ636103 | UGS01395 | URS01395 |
| 1590 | LP01280 | AY069713 | BS09158 | FJ636363 | UGS01255 | URS01255 |
| 972  | LD37787 | AY051890 | BS17746 | KX801950 | UGS01424 | URS01424 |
| 612  | LD39986 | AY060425 | BS08757 | FJ636257 | UGS01446 | URS01446 |
| 642  | GM06568 | AY070528 | BS04282 | FJ634913 | UGS01335 | URS01335 |
| 591  | GH11193 | AY075329 | BS05820 | FJ635243 | UGS01355 | URS01355 |
| 639  | GH01619 | BT003315 | BS06407 | FJ635478 | UGS01361 | URS01361 |
| 567  | RE42508 | AY119634 | BS12457 | FJ637190 | UGS01285 | URS01285 |
| 804  | RH23273 | AY113574 | BS13489 | FJ637477 |          | URS01290 |
| 660  | LP05860 | AY060449 | BS10637 | FJ636698 | UGS01454 |          |
| 669  | RE14786 | AY071080 | BS11707 | FJ636934 | UGS01276 | URS01276 |
| 1164 | LD04613 | AY069328 | BS04004 | FJ634827 | UGS01330 | URS01330 |
| 603  | LD21953 | AY094795 | BS06671 | FJ635584 | UGS01369 | URS01369 |
| 657  | GH24702 | AY060343 | BS07832 | FJ636005 | UGS01391 | URS01391 |

|      |          |          |         |          |          |          |
|------|----------|----------|---------|----------|----------|----------|
| 624  | GH09086  | AY060261 | BS07047 | FJ635703 | UGS01384 | URS01384 |
| 621  | GH03685  | AY060236 | BS06991 | FJ635684 | UGS01380 | URS01380 |
| 621  | LD44762  | AY069671 | BS08961 | FJ636326 | UGS01214 | URS01214 |
| 768  | RE17845  | AY071139 | BS11759 | FJ638836 | UGS01278 | URS01278 |
| 642  | IP08727  | BT024998 | BS14580 | FJ637714 | UGS01427 | URS01427 |
| 783  | LD47384  | AY122200 | BS09126 | FJ636357 | UGS01217 | URS01217 |
| 639  | RE70650  | AY071647 | BS13079 | FJ637379 | UGS01469 | URS01469 |
| 576  | LD34217  | AY060408 | BS08459 | FJ636168 | UGS01438 | URS01438 |
| 576  | GM13874  | AY118845 | BS05469 | FJ635129 | UGS01346 | URS01346 |
| 954  | RE74715  | AY071661 | BS02841 | FJ634686 |          | URS01288 |
| 2217 | GH03557  | AY089490 | BS10234 | FJ636610 | UGS01490 | URS01490 |
| 603  | LD21679  | AY118912 | BS05602 | FJ635155 | UGS01349 | URS01349 |
| 648  | GM14354  | AY070533 | BS05574 | FJ635152 | UGS01348 | URS01348 |
| 552  | RE42418  | AY121688 | BS12554 | FJ637216 | UGS01284 | URS01284 |
| 546  | RE63021  | BT012453 | BS16093 | FJ638061 | UGS01476 | URS01476 |
| 1611 | LD36080  | AY089553 | BS09916 | FJ636505 | UGS01495 |          |
| 576  | RE36103  | AY119135 | BS12173 | FJ637087 | UGS01465 | URS01465 |
| 2913 | GH01881  | AY058264 | BS01336 | FJ634600 | UGS01313 | URS01313 |
| 576  | GH20776  | AY119536 | BS06543 | FJ635537 | UGS01364 | URS01364 |
| 1320 | SD02309  | AY050239 | BS09319 | FJ636393 | UGS01218 | URS01218 |
| 603  | LD16419  | AY061221 | BS04210 | FJ634878 | UGS01337 | URS01337 |
| 1179 | LD41588  | AY051936 | BS08802 | FJ636270 | UGS01207 | URS01207 |
| 654  | RE02339  | AY070910 | BS16737 | FJ638185 | UGS01433 | URS01433 |
| 615  | GM13948  | AY051640 | BS05471 | FJ635131 | UGS01347 | URS01347 |
| 384  | RE10554  | AY075451 | BS11434 | FJ636865 | UGS01272 | URS01272 |
| 651  | LD31286  | AY058620 | BS10439 | FJ636661 | UGS01230 | URS01230 |
| 948  | GH19261  | BT003610 | BS14948 | FJ637837 | UGS01405 |          |
| 1224 | LD40460  | AY051918 | BS08669 | FJ636229 | UGS01428 | URS01428 |
| 1248 | GM13876  | AY058486 | BS06639 | FJ635572 |          | URS01367 |
| 1542 | LD44595  | AY122193 | BS08958 | FJ636324 | UGS01213 | URS01213 |
| 1428 | SD09476  | AY052137 | BS09382 | FJ636406 | UGS01236 | URS01236 |
| 492  | LD37115* | AY051879 | BS08610 | FJ636207 | UGS01206 | URS01206 |
| 942  | HL08111  | AY060358 | BS06645 | FJ635576 | UGS01254 |          |
| 1923 | RE64552  | AY119652 | BS13207 | KX805712 | UGS01467 |          |
| 945  | GM13370* | AY060981 | BS09612 | FJ636452 | UGS01221 | URS01221 |
| 483  | IP02725  | BT023253 | BS17067 | FJ638243 | UGS01479 | URS01479 |
| 1530 | LD08669  | AY118898 | BS05002 | FJ635028 | UGS01240 | URS01240 |
| 1458 | LD15813  | BT016105 | ND      | ~        |          |          |
| 1536 | RH62992  | AY071759 | BS14010 | KX805777 | UGS01470 | URS01470 |
| 651  | GH02759  | BT004505 | BS05651 | FJ635193 | UGS01352 | URS01352 |
| 2904 | LD04007  | AY089533 | BS01623 | FJ638767 | UGS01323 | URS01323 |

|      |         |          |         |          |          |          |
|------|---------|----------|---------|----------|----------|----------|
| 783  | GH04031 | AY118731 | BS05664 | FJ635204 | UGS01353 |          |
| 1338 | GH17420 | AY060726 | BS09464 | FJ636424 | UGS01449 | URS01449 |
| 522  | LD14743 | AY122159 | BS02803 | FJ634675 | UGS01231 | URS01231 |
| 1656 | LD30429 | AY051781 | ND      | ~        |          |          |
| 3339 | LP12374 | BT010285 | BS01347 | FJ634604 | UGS01314 |          |
| 867  | RE01069 | AY069760 | BS11302 | FJ636812 | UGS01268 | URS01268 |
| 1803 | RE73180 | BT001740 | BS15854 | KX805206 | UGS01474 | URS01474 |
| 1599 | RE55465 | BT021257 | BS18055 | KX804603 | UGS01437 | URS01437 |
| 2670 | LD45081 | AY094837 | BS10614 | KX801710 | UGS01264 | URS01264 |
| 2565 | SD04959 | AY069809 | ND      | ~        |          |          |
| 651  | SD04693 | AY094963 | BS10177 | FJ636584 | UGS01226 | URS01226 |
| 387  | SD05285 | BT009942 | BS17965 | KX803730 | UGS01425 | URS01425 |
| 1482 | LD46328 | AY069690 | BS08894 | FJ636315 |          | URS01216 |
| 873  | LD43943 | AY061472 | BS09946 | FJ636509 | UGS01222 | URS01222 |
| 2196 | RE65757 | BT003184 | BS15937 | KX800618 | UGS01413 | URS01413 |
| 2034 | LD42274 | AY051953 | BS08818 | FJ636277 | UGS01253 | URS01253 |
| 1446 | LD24662 | AY051707 | BS06939 | FJ635671 |          | URS01374 |
| 1134 | RE14108 | AY071059 | BS11482 | FJ636886 | UGS01274 | URS01274 |
| 732  | LD45244 | AY061489 | BS06240 | FJ635409 | UGS01359 | URS01359 |
| 1059 | LD44083 | AY069663 | BS01082 | FJ634519 | UGS01304 | URS01304 |
| 1041 | RE13621 | AY094853 | BS11472 | FJ636882 | UGS01273 | URS01273 |
| 1395 | RE17884 | AY071140 | BS01533 | FJ634637 | UGS01308 | URS01308 |
| 1755 | SD04652 | AY052097 | ND      | ~        |          |          |
| 2328 | RE08173 | BT010024 | BS16278 | KX804384 |          | URS01432 |
| 1623 | LD31064 | AY051795 | BS08505 | FJ636186 | UGS01249 | URS01249 |
| 1209 | GH23271 | AY094727 | BS07805 | FJ635993 | UGS01390 | URS01390 |
| 1458 | LD20987 | AY094792 | BS04254 | FJ634901 | UGS01338 | URS01338 |
| 1425 | GH01161 | AY047501 | BS06959 | FJ635674 | UGS01376 |          |
| 3300 | LD23779 | AY118330 | BS10207 | FJ636595 |          | URS01451 |
| 801  | RE39068 | AY118391 | BS12411 | FJ637162 | UGS01283 | URS01283 |
| 804  | LD19727 | AF160941 | BS03726 | FJ634761 | UGS01327 | URS01327 |
| 462  | RE47264 | BT012459 | BS16091 | FJ638060 | UGS01475 | URS01475 |
| 2919 | LD21888 | AY069489 | BS10855 | KX800269 | UGS01459 | URS01459 |
| 948  | GH18603 | AY060735 | BS06101 | FJ635351 | UGS01356 | URS01356 |
| 831  | GH17465 | AY060729 | BS06537 | FJ635534 | UGS01363 | URS01363 |
| 1524 | LD09973 | AY069393 | BS02253 | FJ634666 | UGS01343 | URS01343 |
| 2379 | LD25754 | AY069536 | BS10816 | KX804777 | UGS01456 | URS01456 |
| 2883 | SD03117 | AY128501 | BS10843 | KX801314 | UGS01457 | URS01457 |
| 630  | GH04443 | AY060620 | BS06895 | FJ635661 | UGS01381 | URS01381 |
| 1581 | RE12101 | AY070576 | BS11456 | FJ636874 | UGS01461 | URS01461 |
| 771  | IP02648 | BT023269 | BS17164 | FJ638261 | UGS01480 |          |

|      |         |          |         |          |          |          |
|------|---------|----------|---------|----------|----------|----------|
| 1224 | LD41958 | AY051942 | BS08807 | FJ636272 | UGS01208 | URS01208 |
| 1227 | LD03827 | AY119574 | BS03994 | FJ634824 | UGS01329 |          |
| 1191 | LD36412 | AY058659 | BS08591 | FJ636203 |          | URS01205 |

| Donor clone open (DO) | DO Accession number | ORF::GFP | ORF::RFP | 4-way | 2-way | FRET |
|-----------------------|---------------------|----------|----------|-------|-------|------|
| BO15418               | FJ633451            | UGO01207 | URO01207 | yes   | yes   |      |
| BO11734               | FJ632172            | UGO01171 | URO01171 | yes   | yes   |      |
| BO10969               | FJ631941            | UGO01162 |          |       |       |      |
| BO09856               | FJ631595            |          | URO01120 |       | yes   |      |
| BO11448               | KX798731            | UGO01292 | URO01292 | yes   | yes   |      |
| BO09372               | FJ631486            | UGO01322 | URO01115 |       | yes   |      |
| BO10808               | FJ631880            | UGO01331 |          |       |       |      |
| BO07302               | FJ630741            |          | URO01072 |       | yes   |      |
| BO11081               | FJ631990            | UGO01167 | URO01167 |       | yes   |      |
| BO04448               | FJ629768            | UGO01031 | URO01031 | yes   | yes   |      |
| BO12359               | FJ632414            | UGO01287 | URO01287 | yes   | yes   |      |
| BO07663               | FJ630884            |          | URO01085 |       | yes   |      |
| BO15771               | FJ633577            | UGO01215 | URO01215 |       | yes   |      |
| BO05646               | FJ630114            | UGO01244 | URO01244 |       | yes   |      |
| BO12040               | FJ632290            | UGO01177 | URO01177 |       | yes   |      |
| BO06049               | FJ630253            | UGO01051 | URO01051 | yes   | yes   |      |
| ND                    | ~                   |          |          |       | yes   |      |
| BO04730               | FJ629855            |          | URO01057 |       | yes   |      |
| BO08882               | FJ631300            | UGO01104 |          |       | yes   | ★    |
| BO08578               | FJ631245            | UGO01102 | URO01102 | yes   | yes   |      |
| BO15369               | FJ633432            | UGO01272 | URO01272 | yes   | yes   |      |
| BO13858               | FJ632954            |          | URO01156 |       | yes   |      |
| BO17805               | FJ634222            | UGO01223 | URO01223 | yes   | yes   |      |
| BO17838               | FJ634234            | UGO01235 | URO01235 | yes   | yes   |      |
| BO04049               | FJ629615            |          | URO01028 |       | yes   |      |
| BO16181               | FJ633728            | UGO01278 | URO01278 | yes   | yes   |      |
| BO11938               | FJ632252            | UGO01230 | URO01230 | yes   | yes   |      |
| BO12248               | FJ632378            | UGO01263 | URO01263 | yes   | yes   |      |
| BO12196               | FJ632354            | UGO01179 |          |       | yes   |      |
| BO12571               | FJ638703            | UGO01182 | URO01182 | yes   | yes   |      |
| BO07372               | FJ630767            | UGO01078 | URO01078 | yes   | yes   |      |
| BO04017               | FJ629601            | UGO01137 | URO01336 | yes   | yes   |      |
| BO15123               | FJ633349            |          | URO01206 |       | yes   |      |
| BO14906               | FJ633272            | UGO01204 | URO01204 |       | yes   |      |
| BO10901               | FJ631916            | UGO01128 | URO01128 | yes   | yes   |      |
| BO11720               | FJ632167            | UGO01169 | URO01169 | yes   | yes   |      |
| BO08561               | FJ631239            | UGO01147 | URO01147 | yes   | yes   |      |
| BO03627               | FJ629572            | UGO01015 | URO01306 | yes   | yes   |      |

|         |          |          |          |     |     |
|---------|----------|----------|----------|-----|-----|
| BO04802 | FJ629865 | UGO01309 |          |     | yes |
| BO05476 | FJ630057 | UGO01243 |          |     | yes |
| BO14674 | FJ633221 |          | URO01195 |     | yes |
| BO05426 | FJ630030 |          | URO01017 |     | yes |
| BO13268 | FJ632742 | UGO01268 |          |     | yes |
| BO07723 | FJ630908 | UGO01142 | URO01142 | yes | yes |
| BO05417 | FJ630024 | UGO01242 | URO01242 |     | yes |
| BO15481 | FJ633490 | UGO01273 |          |     | yes |
| BO03858 | FJ629590 | UGO01134 | URO01134 |     | yes |
| BO08884 | FJ631302 | UGO01151 | URO01151 | yes | yes |
| BO06887 | FJ630582 |          | URO01065 |     | yes |
| BO10625 | FJ631819 | UGO01252 | URO01252 |     | yes |
| BO14872 | FJ633264 |          | URO01271 |     | yes |
| BO06010 | FJ630222 | UGO01050 | URO01050 | yes | yes |
| BO09740 | FJ631561 | UGO01119 | URO01119 | yes | yes |
| BO06788 | FJ630532 | UGO01060 | URO01060 | yes | yes |
| BO07777 | FJ630926 | UGO01143 | URO01143 | yes | yes |
| BO08190 | FJ631095 |          | URO01146 |     | yes |
| BO13864 | FJ632958 | UGO01335 | URO01192 | yes | yes |
| BO12453 | FJ632446 | UGO01264 | URO01264 |     | yes |
| BO04450 | FJ629770 | UGO01032 | URO01032 | yes | yes |
| BO12075 | FJ632302 | UGO01262 | URO01262 | yes | yes |
| BO07413 | FJ630776 | UGO01082 | URO01082 | yes | yes |
| BO16231 | FJ633742 | UGO01201 |          |     | yes |
| BO17738 | FJ634197 | UGO01234 | URO01234 | yes | yes |
| BO16385 | FJ633806 | UGO01203 | URO01203 | yes | yes |
| BO08144 | FJ631076 | UGO01088 | URO01088 | yes | yes |
| BO04976 | FJ638626 | UGO01139 | URO01139 | yes | yes |
| ND      | ~        |          |          |     | yes |
| BO10514 | FJ631796 | UGO01250 | URO01250 |     | yes |
| BO10890 | FJ631914 | UGO01163 | URO01163 |     | yes |
| BO12526 | FJ632472 | UGO01181 | URO01342 | yes | yes |
| BO08583 | FJ631246 |          | URO01148 |     | yes |
| BO14360 | FJ633102 | UGO01193 | URO01193 | yes | yes |
| BO16414 | FJ633820 | UGO01218 | URO01218 |     | yes |
| BO15459 | FJ633479 | UGO01208 | URO01208 | yes | yes |
| BO03662 | FJ629581 | UGO01135 | URO01135 | yes | yes |
| BO07422 | FJ630780 |          | URO01083 |     | yes |
| BO09255 | FJ631448 | UGO01112 |          |     | yes |
| BO06596 | FJ630456 | UGO01311 | URO01058 | yes | yes |
| BO07192 | FJ630699 |          | URO01071 |     |     |

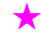



|         |          |          |          |     |     |
|---------|----------|----------|----------|-----|-----|
| BO11122 | FJ632004 | UGO01229 |          |     | yes |
| BO08865 | FJ631295 | UGO01103 |          |     | yes |
| BO06823 | FJ630547 | UGO01062 | URO01062 |     | yes |
| BO04849 | FJ629894 | UGO01241 | URO01241 |     | yes |
| BO09221 | FJ631433 | UGO01109 | URO01109 | yes | yes |
| BO04662 | FJ629832 | UGO01138 | URO01138 | yes | yes |
| BO09185 | FJ631423 | UGO01152 | URO01152 |     | yes |
| BO04828 | FJ629880 | UGO01041 | URO01314 | yes | yes |
| BO01296 | FJ629469 |          | URO01022 |     | yes |
| BO17223 | FJ634060 | UGO01221 | URO01221 | yes | yes |
| BO22320 | KX795772 | UGO01026 | URO01310 | yes | yes |
| BO16511 | FJ633847 | UGO01217 | URO01217 | yes | yes |
| BO04634 | FJ629819 |          | URO01033 |     | yes |
| BO01483 | FJ629516 | UGO01005 | URO01005 | yes | yes |
| BO07364 | FJ630761 | UGO01317 | URO01324 | yes | yes |
| BO18074 | FJ634307 | UGO01226 |          |     | yes |
| BO09902 | MN238606 | UGO01247 | URO01247 |     | yes |
| BO10379 | FJ631727 | UGO01123 |          |     | yes |
| BO16576 | FJ633868 | UGO01231 |          |     | yes |
| BO21745 | KX794432 | UGO01294 | URO01294 |     | yes |
| BO07020 | FJ630629 | UGO01312 | URO01066 | yes | yes |
| BO15805 | FJ633589 | UGO01211 | URO01211 | yes | yes |
| BO05472 | FJ630054 |          | URO01044 |     | yes |
| BO07075 | FJ630652 | UGO01070 | URO01320 | yes | yes |
| BO04826 | FJ629878 | UGO01040 | URO01040 |     | yes |
| BO10909 | FJ631920 | UGO01129 | URO01129 |     | yes |
| BO03746 | FJ629588 | UGO01326 |          |     | yes |
| BO08515 | FJ631223 | UGO01094 | URO01094 |     | yes |
| BO13676 | FJ632901 | UGO01189 | URO01344 | yes | yes |
| BO01141 | FJ629434 | UGO01012 | URO01305 |     | yes |
| BO16096 | FJ633718 | UGO01277 | URO01277 | yes | yes |
| BO10605 | KX797345 |          | URO01285 |     | yes |
| BO02243 | FJ629558 |          | URO01303 |     | yes |
| BO08620 | FJ631260 |          | URO01021 |     | yes |
| BO10449 | FJ631763 | UGO01124 | URO01124 | yes | yes |
| BO11724 | FJ632169 | UGO01170 | URO01170 | yes | yes |
| BO01472 | FJ629511 | UGO01003 | URO01003 | yes | yes |
| BO07140 | FJ630683 | UGO01068 | URO01068 | yes | yes |
| BO07312 | FJ630747 |          | URO01321 |     | yes |
| BO11104 | FJ631999 | UGO01255 |          |     | yes |
| BO13820 | FJ632936 | UGO01191 |          |     | yes |

|         |          |          |          |     |     |
|---------|----------|----------|----------|-----|-----|
| BO08535 | FJ631228 | UGO01101 | URO01101 | yes | yes |
| BO01601 | FJ629546 | UGO01011 | URO01011 |     | yes |
| BO07787 | FJ630929 | UGO01086 | URO01326 | yes | yes |
| BO17004 | FJ634008 | UGO01219 | URO01219 | yes | yes |
| BO07651 | FJ630875 |          | URO01309 |     | yes |
| BO17132 | FJ634036 | UGO01220 | URO01220 | yes | yes |
| BO14651 | FJ633215 | UGO01194 | URO01194 | yes | yes |
| BO17017 | KX799624 | UGO01293 | URO01293 | yes | yes |
| BO08304 | FJ631143 | UGO01089 |          |     | yes |
| BO07240 | FJ630718 | UGO01316 | URO01323 | yes | yes |
| BO11245 | FJ632039 |          | URO01258 |     |     |
| BO01052 | FJ629404 |          | URO01002 |     | yes |
| BO04493 | FJ629784 | UGO01240 | URO01240 | yes | yes |
| BO03268 | MN238596 | UGO01239 |          |     | yes |
| BO08814 | FJ631280 | UGO01150 | URO01150 | yes | yes |
| BO11422 | KX799863 | UGO01304 | URO01025 |     | yes |
| BO10952 | FJ631934 | UGO01161 | URO01338 |     | yes |
| BO15473 | FJ633485 | UGO01209 | URO01209 | yes | yes |
| BO17687 | FJ634191 | UGO01282 |          |     | yes |
| BO11995 | FJ632274 | UGO01332 | URO01175 | yes | yes |
| BO03940 | FJ629594 |          | URO01307 |     | yes |
| BO07993 | FJ631009 | UGO01245 |          |     | yes |
| BO09940 | KX796929 | UGO01248 | URO01248 | yes | yes |
| BO10662 | FJ631832 | UGO01330 | URO01158 | yes | yes |
| BO03638 | FJ629576 |          | URO01132 |     | yes |
| BO08391 | FJ631174 | UGO01093 | URO01093 | yes | yes |
| BO13116 | FJ632680 | UGO01334 | URO01187 | yes | yes |
| BO08523 | FJ631225 |          | URO01096 |     | yes |
| BO13564 | KX799531 | UGO01288 | URO01288 | yes | yes |
| BO11155 | FJ632014 | UGO01165 | URO01165 |     | yes |
| BO01112 | FJ629425 | UGO01007 | URO01007 |     | yes |
| BO01577 | FJ629540 | UGO01022 | URO01304 | yes | yes |
| BO05608 | FJ630087 | UGO01045 | URO01315 |     | yes |
| BO06072 | FJ630271 | UGO01054 | URO01054 |     | yes |
| BO04640 | FJ629822 | UGO01034 | URO01034 | yes | yes |
| BO07283 | FJ630734 |          | URO01079 |     | yes |
| BO10842 | FJ631892 | UGO01160 | URO01160 |     | yes |
| BO07683 | FJ630895 | UGO01144 | URO01144 | yes | yes |
| BO07237 | FJ630717 | UGO01141 | URO01141 | yes | yes |
| BO01104 | FJ629422 | UGO01006 | URO01006 | yes | yes |
| BO16363 | FJ633796 | UGO01202 | URO01202 | yes | yes |

|         |          |          |          |     |     |   |
|---------|----------|----------|----------|-----|-----|---|
| BO15422 | KX798988 | UGO01289 | URO01289 |     | yes |   |
| BO10484 | FJ638675 | UGO01325 | URO01127 | yes | yes | ★ |
| BO17644 | FJ634187 | UGO01281 |          |     | yes |   |
| BO17367 | FJ634094 | UGO01222 | URO01222 | yes | yes |   |
| BO12806 | MN238595 | UGO01266 |          |     |     |   |
| BO10803 | FJ631878 | UGO01253 | URO01253 |     | yes |   |
| BO01446 | KX796304 | UGO01001 | URO01301 |     | yes |   |
| BO15693 | FJ633554 | UGO01216 |          |     | yes |   |
| BO11863 | FJ632223 | UGO01260 | URO01260 | yes | yes |   |
| BO15748 | FJ633572 | UGO01214 | URO01214 | yes | yes |   |
| BO10452 | FJ631766 |          | URO01332 |     | yes |   |
| BO15870 | FJ633613 | UGO01212 | URO01212 | yes | yes |   |
| BO08375 | FJ631170 |          | URO01092 |     | yes |   |
| BO22128 | KX799357 |          | URO01296 |     |     |   |
| BO09252 | FJ631446 |          | URO01111 |     | yes |   |
| BO17948 | FJ634262 | UGO01236 | URO01236 | yes | yes |   |
| BO04869 | FJ629905 | UGO01042 | URO01042 | yes | yes |   |
| BO09244 | FJ631442 |          | URO01110 |     |     |   |
| BO10560 | FJ631804 |          | URO01284 |     |     |   |
| BO07793 | FJ630933 | UGO01329 | URO01145 | yes | yes |   |
| BO12514 | FJ632463 | UGO01333 | URO01180 |     | yes |   |
| BO07839 | FJ630952 | UGO01087 |          |     | yes |   |
| BO15495 | FJ633496 | UGO01210 | URO01210 | yes | yes |   |
| BO12834 | FJ632596 | UGO01186 | URO01343 | yes | yes |   |
| BO08189 | FJ631094 |          | URO01020 |     |     |   |
| BO16305 | FJ633776 | UGO01196 | URO01196 | yes | yes |   |
| BO17804 | FJ634221 | UGO01283 | URO01283 | yes | yes |   |
| BO08517 | FJ631224 | UGO01095 | URO01095 | yes | yes |   |
| BO09558 | FJ638669 | UGO01155 | URO01155 | yes | yes |   |
| BO17946 | FJ634261 | UGO01224 |          |     | yes |   |
| BO09057 | FJ631370 | UGO01246 | URO01246 | yes | yes |   |
| BO04682 | FJ629841 | UGO01307 | URO01035 | yes | yes |   |
| BO06220 | FJ630306 | UGO01055 | URO01055 | yes | yes |   |
| BO06807 | FJ630540 |          | URO01317 |     | yes |   |
| BO12757 | FJ632552 | UGO01185 |          |     | yes |   |
| ND      | ~        |          |          |     |     |   |
| BO11037 | FJ631967 | UGO01254 | URO01254 |     | yes |   |
| BO12007 | FJ632279 | UGO01176 | URO01176 | yes | yes |   |
| BO04404 | FJ629745 | UGO01030 | URO01030 | yes | yes |   |
| BO07171 | FJ630695 | UGO01069 | URO01319 | yes | yes |   |
| BO08232 | FJ631109 | UGO01091 | URO01091 | yes | yes |   |

|         |          |          |          |     |     |   |
|---------|----------|----------|----------|-----|-----|---|
| BO07547 | FJ630835 |          | URO01084 |     | yes |   |
| BO07291 | FJ630738 |          | URO01080 |     | yes |   |
| BO09261 | FJ631453 | UGO01321 |          |     | yes |   |
| BO12059 | FJ632294 | UGO01178 |          |     | yes |   |
| BO18480 | FJ634433 | UGO01227 | URO01227 | yes | yes |   |
| BO09426 | FJ631501 |          | URO01117 |     | yes |   |
| BO13579 | MN238605 | UGO01269 | URO01269 | yes | yes |   |
| BO08859 | FJ631293 |          | URO01238 |     | yes | ★ |
| BO05869 | FJ630177 | UGO01046 | URO01046 | yes | yes |   |
| BO13592 | FJ632848 | UGO01188 | URO01188 |     | yes |   |
| BO10634 | KX795535 | UGO01290 | URO01290 | yes | yes |   |
| BO06002 | FJ630214 | UGO01049 | URO01049 | yes | yes |   |
| BO05874 | FJ630181 |          | URO01048 |     | yes |   |
| BO12754 | FJ632550 | UGO01184 | URO01184 | yes | yes |   |
| BO16093 | FJ633716 | UGO01276 |          |     | yes |   |
| BO21842 | KX793921 | UGO01295 | URO01295 |     | yes |   |
| BO12573 | FJ632495 | UGO01265 | URO01265 | yes | yes |   |
| BO01335 | FJ629477 | UGO01013 | URO01013 | yes | yes |   |
| BO06843 | FJ630558 | UGO01064 | URO01318 | yes | yes |   |
| BO09719 | FJ631556 | UGO01118 | URO01330 | yes | yes | ★ |
| BO04710 | FJ629849 |          | URO01312 |     | yes |   |
| BO09202 | FJ631427 | UGO01107 | URO01107 | yes | yes |   |
| BO17637 | FJ634185 |          | URO01233 |     | yes |   |
| BO05871 | FJ630179 | UGO01310 | URO01047 | yes | yes |   |
| BO11934 | FJ632250 | UGO01172 | URO01172 | yes | yes |   |
| BO10939 | FJ631930 |          | URO01334 |     | yes |   |
| BO14848 | FJ633259 | UGO01205 | URO01205 |     | yes |   |
| BO09069 | FJ631379 | UGO01228 | URO01228 | yes | yes |   |
| BO07139 | FJ630682 |          | URO01067 |     |     |   |
| BO09258 | FJ631450 | UGO01113 | URO01113 | yes | yes |   |
| BO03884 | FJ629591 |          | URO01136 |     | yes |   |
| BO09010 | FJ631350 | UGO01319 | URO01106 | yes | yes |   |
| BO07145 | FJ630686 | UGO01154 | URO01154 |     | yes |   |
| BO13107 | FJ632677 | UGO01267 | URO01267 |     | yes |   |
| BO10012 | FJ631633 |          | URO01121 |     | yes |   |
| BO16667 | KX799925 |          | URO01279 |     | yes |   |
| BO05402 | FJ630015 | UGO01140 | URO01140 | yes | yes |   |
| BO05207 | FJ629996 | UGO01018 | URO01308 |     | yes |   |
| BO14010 | FJ632993 | UGO01270 | URO01270 | yes | yes |   |
| BO06051 | FJ630254 | UGO01052 | URO01052 | yes | yes |   |
| BO02323 | MN238601 |          | URO01023 |     | yes |   |

|         |          |          |          |     |     |
|---------|----------|----------|----------|-----|-----|
| BO06064 | FJ630265 | UGO01053 | URO01053 |     | yes |
| BO09964 | FJ631624 | UGO01249 | URO01249 | yes | yes |
| BO03603 | FJ629568 | UGO01131 | URO01335 | yes | yes |
| BO10931 | KX796096 | UGO01291 |          |     |     |
| BO01347 | FJ629482 | UGO01014 | URO01014 |     | yes |
| BO11702 | FJ632161 | UGO01168 | URO01168 | yes | yes |
| BO15754 | FJ633575 | UGO01274 |          |     | yes |
| BO18355 | FJ634388 | UGO01237 | URO01237 | yes | yes |
| BO11114 | FJ632000 | UGO01164 |          |     | yes |
| BO11056 | FJ631976 | UGO01166 | URO01166 |     | yes |
| BO10477 | FJ631783 | UGO01126 | URO01333 | yes | yes |
| BO18165 | FJ634336 | UGO01225 | URO01225 | yes | yes |
| BO09294 | FJ631466 | UGO01323 | URO01116 |     | yes |
| BO10346 | FJ631714 | UGO01122 | URO01122 | yes | yes |
| BO15737 | FJ633566 | UGO01213 | URO01213 | yes | yes |
| BO09318 | FJ631471 | UGO01153 | URO01153 | yes | yes |
| BO07339 | FJ630755 |          | URO01322 |     |     |
| BO11882 | FJ632233 |          | URO01341 |     | yes |
| BO06740 | FJ630512 | UGO01059 | URO01059 | yes | yes |
| BO01082 | FJ629415 | UGO01004 | URO01004 | yes | yes |
| BO11972 | FJ632264 | UGO01173 | URO01340 | yes | yes |
| BO01534 | FJ629531 | UGO01008 |          |     | yes |
| BO09644 | FJ631548 | UGO01024 | URO01024 |     | yes |
| BO16578 | FJ633869 | UGO01232 | URO01232 |     | yes |
| BO08805 | FJ631277 | UGO01149 | URO01149 | yes | yes |
| BO08205 | FJ631097 | UGO01090 | URO01090 | yes | yes |
| BO04754 | FJ629859 | UGO01038 | URO01038 | yes | yes |
| BO07259 | FJ630725 | UGO01076 | URO01076 |     | yes |
| BO10607 | FJ631812 | UGO01251 | URO01251 |     | yes |
| BO12711 | FJ632528 | UGO01183 | URO01183 | yes | yes |
| BO04026 | FJ629603 |          | URO01027 |     | yes |
| BO16091 | FJ633715 | UGO01275 | URO01275 | yes | yes |
| BO11255 | FJ632044 | UGO01259 | URO01259 | yes | yes |
| BO06401 | FJ630377 | UGO01056 | URO01316 | yes | yes |
| BO06837 | FJ630554 |          | URO01063 |     | yes |
| BO05420 | FJ630026 | UGO01043 |          |     | yes |
| BO11216 | KX793935 | UGO01256 |          |     | yes |
| BO11243 | FJ632038 | UGO01257 | URO01257 | yes | yes |
| BO07395 | FJ630772 | UGO01081 |          |     | yes |
| BO11956 | FJ632257 | UGO01261 | URO01261 | yes | yes |
| BO16764 | FJ633905 | UGO01280 | URO01280 |     | yes |

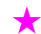

|         |          |          |          |     |     |
|---------|----------|----------|----------|-----|-----|
| BO09207 | FJ631429 | UGO01320 | URO01108 | yes | yes |
| BO04294 | FJ629722 | UGO01305 |          |     | yes |
| BO08991 | FJ631342 | UGO01105 | URO01105 |     | yes |
